# Supplementary material
Source: PubMed Central journal article supplement (PMC4150789)
Supplement: supp_gku686_nar-00984-y-2014-File008.pdf [file supp_gku686_nar-00984-y-2014-File008.pdf]

## SUPPLEMENTARY RESULTS

### Effect of 7SL silencing on cell toxicity

Since prolonged silencing of 7SL causes cell death, we tested the possibility that the upregulation of p53 was due to cell toxicity caused by lowering 7SL. At earlier time points after transfection of 7SL siRNA, 7SL abundance was quantified by RT-qPCR (Fig. S3A), HuR binding to *TP53* mRNA was assessed by RIP analysis (Fig. S3B), and cell viability was evaluated by counting live cells (Fig. S3C). As shown, toxicity was negligible at 12 and 24 h after transfection (Fig. S3C), even though 7SL abundance was already reduced to ~50% of the initial levels (Fig. S3A), and HuR binding to *TP53* mRNA had already more than doubled (Fig. S3B). These findings support the view that the increase in p53 levels was not indirectly due to toxicity derived from lowering 7SL levels, since the decline in 7SL amply precedes HeLa cell toxicity.

## SUPPLEMENTARY TABLE LEGEND

**Supplementary Table 1.** The human transcriptome was examined to identify mRNAs showing at least 30 nucleotide-long matches with 7SL. The positions of 7SL and the target mRNA in these putative hybrids are indicated; the location of the coding region and 3'UTR for each mRNA, as well as the location of HuR PAR-CLIP sites are also indicated. These interactions will be investigated separately.

Abdelmohsen *et al.*, Supplementary Figure S1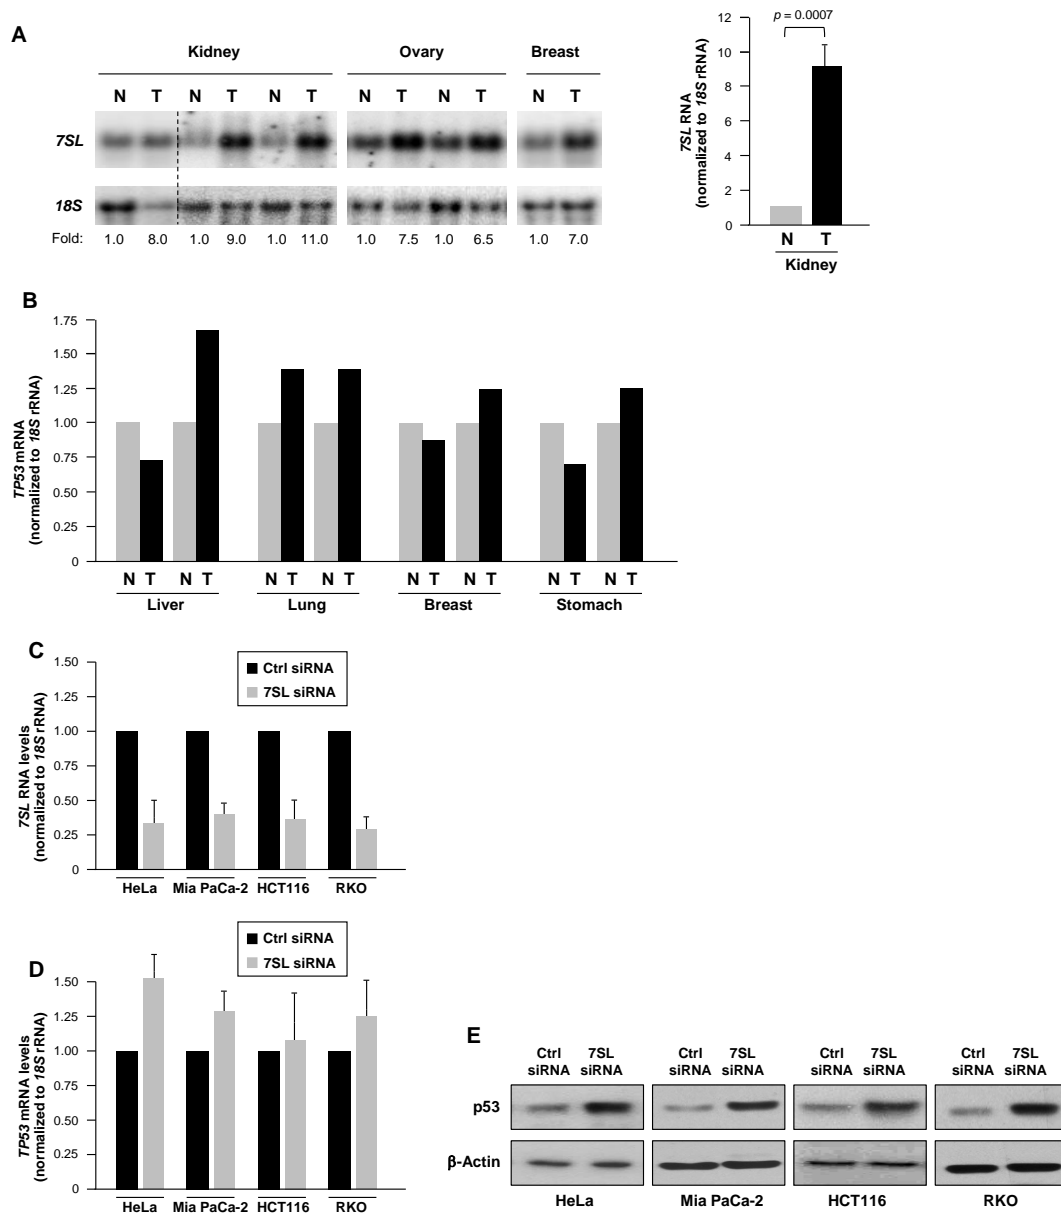

**Supplementary Figure S1.** (A) The abundance of *7SL* in the tumor tissues (T) indicated (kidney, ovary, breast) relative to adjacent normal tissues (N) was measured by Northern blot analysis and normalized to *18S* rRNA levels (right). Samples were obtained from BioChain Institute, Inc. (Breast and first pair of N and T Kidney tissues) or from the University of Maryland tissue bank (Ovary and remaining Kidney tissues). *Right*, for kidney, three pairs of (N,T) samples were available, and therefore the means and standard deviation (S.D.) were calculated and plotted; *p*-value is indicated. (B) The abundance of *TP53* mRNA in (T) tissues (liver, lung, breast, stomach) and adjacent normal tissues (N) was measured by RT-qPCR analysis and normalized to *18S* rRNA levels. (C-E) Forty-eight h after Ctrl siRNA or *7SL* siRNA transfection of HeLa, Mia PaCa-2, HCT116, or RKO cells, the levels of *7SL* RNA (C) and *TP53* mRNA (D) were assessed by RT-qPCR, normalized to *18S* rRNA, and plotted, and p53 levels were assessed by Western blot analysis (E). Data in A,C,D are the means  $\pm$ S.D. from three independent experiments.

Abdelmohsen *et al.*, Supplementary Figure S2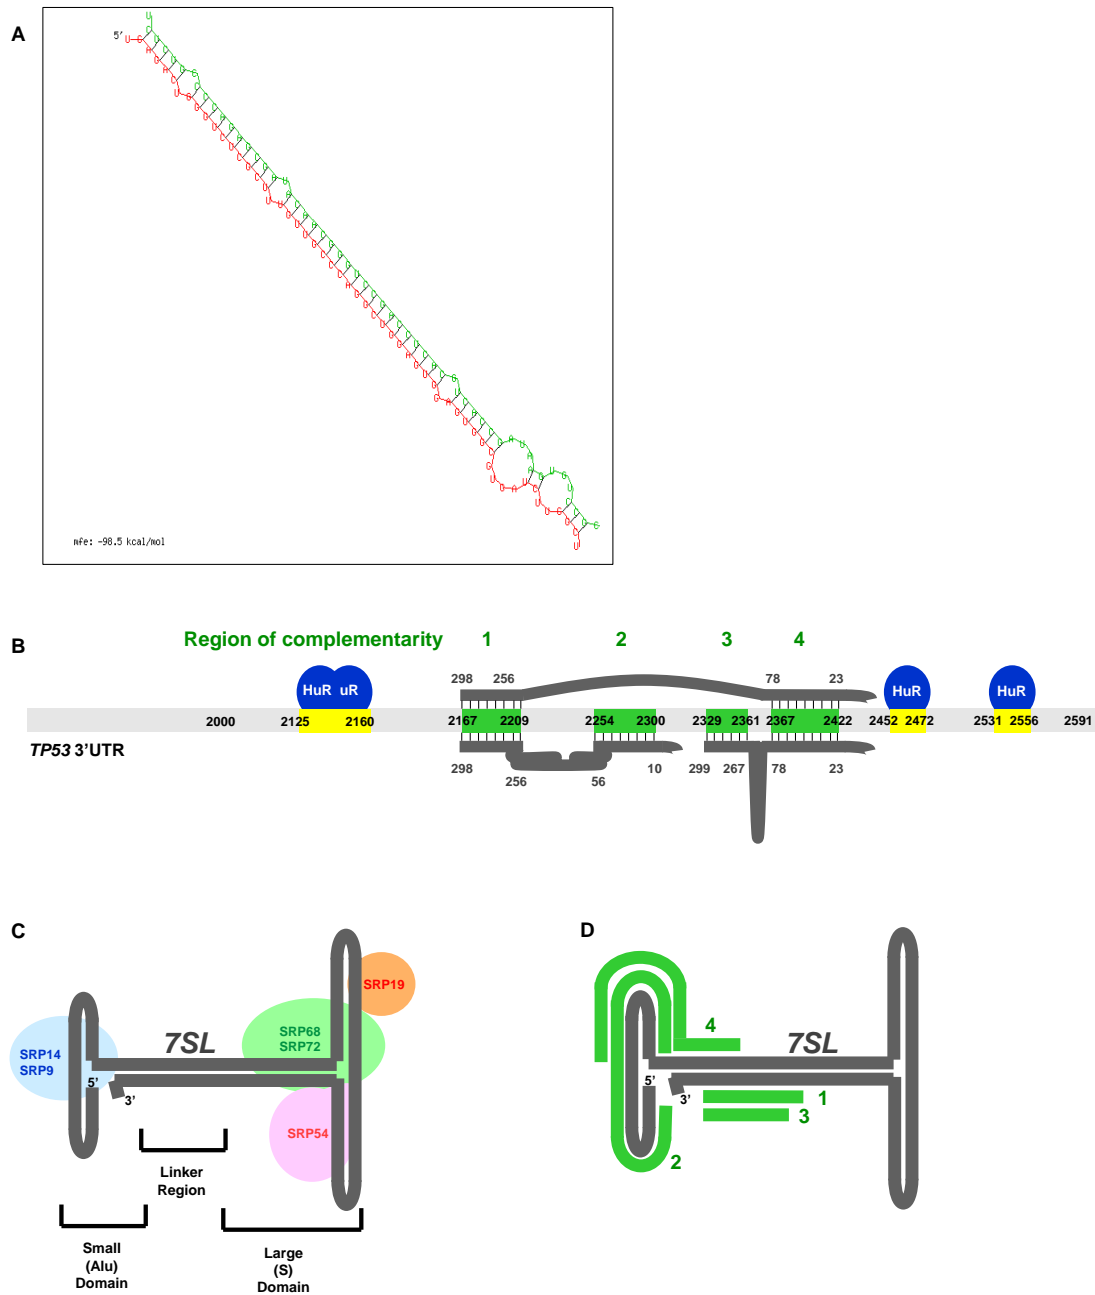

**Supplementary Figure S2.** (A) The putative association between *7SL* and *TP53* 3'UTR was tested using RNA hybrid (<http://bibiserv.techfak.uni-bielefeld.de/rnahybrid>). Red, *TP53* mRNA; green, *7SL*. (B) Shown are the regions of complementarity (numbered 1-4) between *7SL* (dark gray) and *TP53* 3'UTR. (C) The main areas of association of SRP proteins with *7SL*, as well as the main *7SL* regions ['Small (Alu) Domain', 'Linker Region', and 'Large (S) Domain'] are indicated in the schematic. (D) The interaction of *TP53* 3'UTR regions 1-4 (panel A) with *7SL* are indicated schematically.

Abdelmohsen *et al.*, Supplementary Figure S3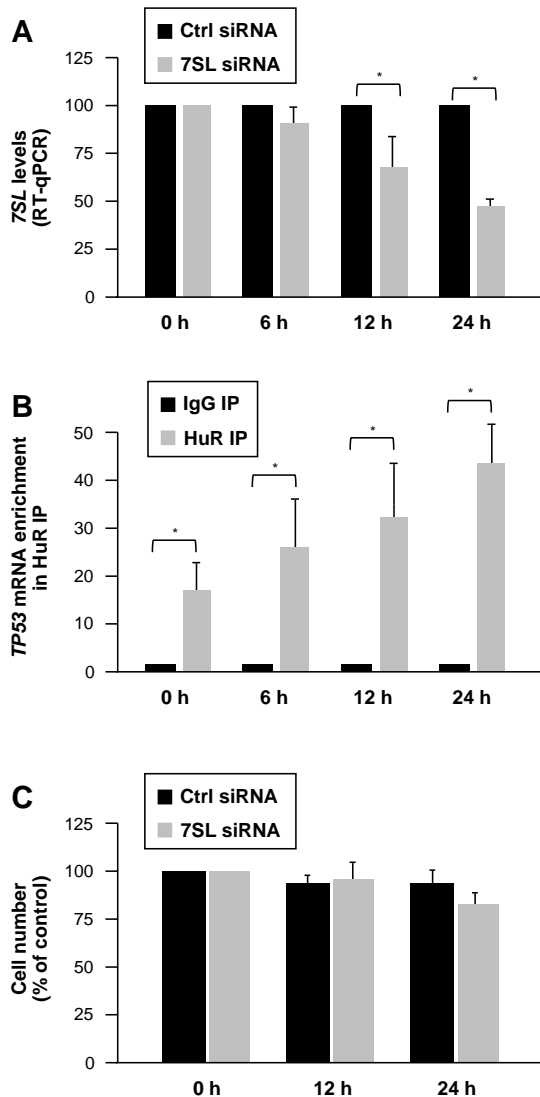

**Supplementary Figure S3.** (A) HeLa cells were transfected with Ctrl siRNA or 7SL siRNA and the levels of 7SL remaining at the times indicated (0, 6, 12, 24 h after transfection) were measured by RT-qPCR, normalized to *U6* RNA levels, and plotted relative (%) to 7SL levels in the Ctrl siRNA transfection group. (B) RIP analysis of *TP53* mRNA levels in HuR IP (relative to IgG IP) at the times indicated after transfection of either Ctrl siRNA or 7SL siRNA. (C) Percentage of cells remaining in the 7SL siRNA transfection group 12 and 24 h after transfection, compared with the cells remaining in the Ctrl siRNA transfection group. Data in (A-C) are shown as the means and S.D. of three independent experiments; \* denotes  $p < 0.05$ .

Abdelmohsen *et al.*, Supplementary Figure S4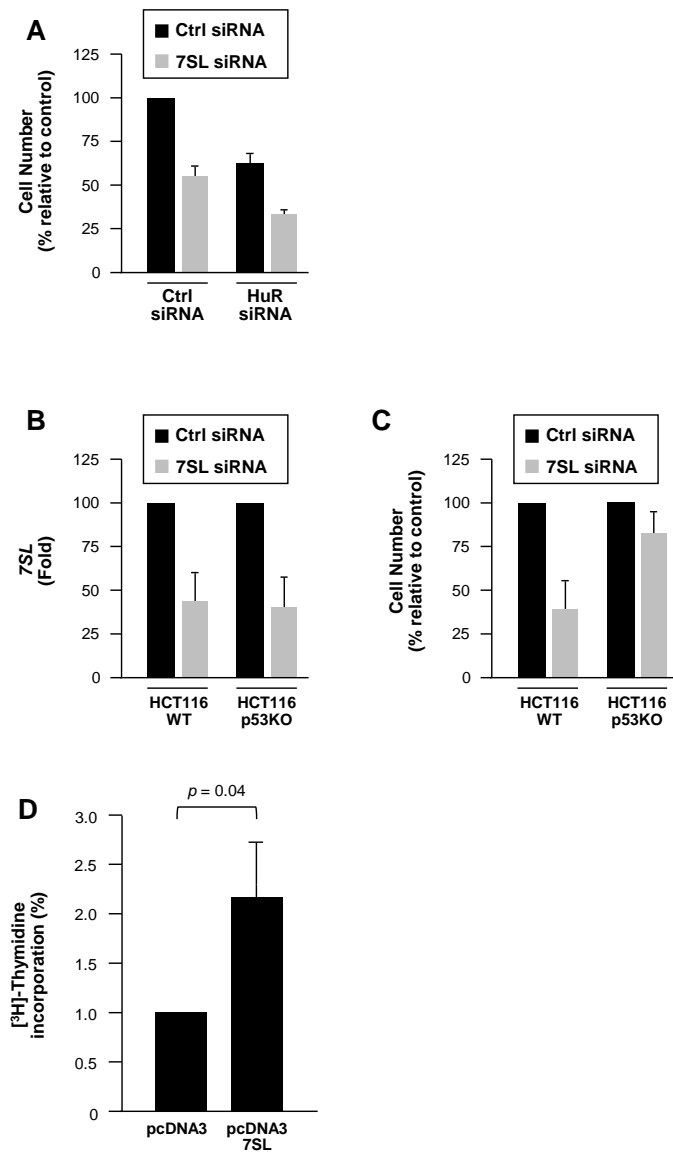

**Supplementary Figure S4.** (A) Forty-eight h after transfection of HeLa cells with indicated siRNAs, cell numbers were measured using a hemocytometer and represented as percentage of cells relative to the Ctrl siRNA group. (B) RT-qPCR analysis of 7SL levels two days after transfection of HCT116 (WT or p53KO) cells either with Ctrl siRNA or 7SL siRNA. (C) Forty-eight hours after the transfection of HCT116 (WT or p53KO) cells with Ctrl siRNA or 7SL siRNA, cell numbers were determined by direct cell counts using a hemocytometer. (D) Forty-eight h after transfecting HeLa cells with plasmids pcDNA3 or pcDNA3-7SL (as described in the main Figure 2E), [<sup>3</sup>H]-thymidine incorporation was measured. Data in A-D represent the means and  $\pm$  SD from 3 independent experiments.
