# Supplementary material
Source: PubMed Central journal article supplement (PMC4150789)
Supplement: supp_gku686_nar-00984-y-2014-File009.pdf [file supp_gku686_nar-00984-y-2014-File009.pdf]

| Gene Symbol | Target mRNA<br>Accession | Length of<br>Match | 7SL RNA Seq<br>Start | 7SL RNA Seq<br>End | Target mRNA<br>Seq Start | Target mRNA<br>Seq End | Target mRNA<br>Seq Length | Target mRNA<br>CDS Region | Target mRNA<br>3' UTR Region | HuR target<br>(PAR-CLIP) |
|-------------|--------------------------|--------------------|----------------------|--------------------|--------------------------|------------------------|---------------------------|---------------------------|------------------------------|--------------------------|
| AAK1        | NM_014911.3              | 41                 | 257                  | 297                | 16626                    | 16586                  | 21283                     | 506-3391                  | 3392-21283                   | Yes                      |
| AASS        | NM_005763.3              | 76                 | 1                    | 76                 | 3387                     | 3312                   | 5887                      | 146-2926                  | 2927-5887                    | Yes                      |
| AATK        | XM_005257847             | 40                 | 40                   | 79                 | 6720                     | 6681                   | 9044                      | 75-4199                   | 4200-9044                    | No                       |
| ABCA13      | NM_152701.3              | 59                 | 18                   | 76                 | 16355                    | 16297                  | 17207                     | 25-15201                  | 15202-17207                  | Yes                      |
| ABCB5       | NM_001163942             | 48                 | 20                   | 67                 | 1681                     | 1634                   | 2247                      | 547-942                   | 943-2247                     | No                       |
| ABHD17B     | NM_001025780             | 38                 | 30                   | 67                 | 2512                     | 2475                   | 3153                      | 603-1469                  | 1470-3153                    | No                       |
| ABRA        | NM_139166.4              | 60                 | 19                   | 78                 | 1569                     | 1510                   | 2831                      | 55-1200                   | 1201-2831                    | No                       |
| ACAP2       | NM_012287.5              | 58                 | 10                   | 67                 | 3962                     | 3905                   | 7187                      | 242-2578                  | 2579-7187                    | Yes                      |
| ACBD4       | NM_001135707             | 33                 | 20                   | 52                 | 1241                     | 1209                   | 1500                      | 345-1151                  | 1152-1500                    | No                       |
| ACBD7       | NM_001039844             | 56                 | 21                   | 76                 | 1098                     | 1043                   | 3383                      | 49-315                    | 316-3383                     | Yes                      |
| ACKR2       | NM_001296.4              | 67                 | 10                   | 76                 | 2008                     | 1942                   | 2978                      | 180-1334                  | 1335-2978                    | No                       |
| ACOT13      | NM_001160094             | 49                 | 19                   | 67                 | 1582                     | 1534                   | 4407                      | 588-941                   | 942-4407                     | No                       |
| ACOX1       | NM_001185039             | 38                 | 40                   | 77                 | 5277                     | 5240                   | 7759                      | 650-2518                  | 2519-7759                    | Yes                      |
| ACSL6       | NM_001009185             | 55                 | 22                   | 76                 | 3031                     | 2978                   | 6554                      | 110-2278                  | 2279-6554                    | No                       |
| ACTR10      | NM_018477.2              | 43                 | 256                  | 298                | 1688                     | 1646                   | 2451                      | 104-1357                  | 1358-2451                    | Yes                      |
| ACVRL1      | NM_000020.2              | 35                 | 18                   | 52                 | 2781                     | 2747                   | 4263                      | 284-1795                  | 1796-4263                    | No                       |
| ADAMTS17    | NM_139057.2              | 33                 | 20                   | 52                 | 5645                     | 5613                   | 6331                      | 80-3367                   | 3368-6331                    | Yes                      |
| ADAMTS4     | NM_005099.4              | 57                 | 1                    | 57                 | 3873                     | 3817                   | 4410                      | 429-2942                  | 2943-4410                    | No                       |
| ADAMTSL5    | NM_213604.2              | 39                 | 40                   | 78                 | 2749                     | 2711                   | 2867                      | 445-1860                  | 1861-2867                    | No                       |
| ADARB2      | NM_018702.3              | 31                 | 269                  | 299                | 7841                     | 7811                   | 8426                      | 327-2546                  | 2547-8426                    | No                       |
| ADAT2       | NM_001286259             | 47                 | 22                   | 68                 | 4790                     | 4744                   | 7368                      | 1286-1720                 | 1721-7368                    | Yes                      |
| ADIPOQ      | NM_001177800             | 47                 | 21                   | 67                 | 2761                     | 2715                   | 4629                      | 136-870                   | 871-4629                     | No                       |
| ADRBK2      | NM_005160.3              | 47                 | 21                   | 67                 | 4768                     | 4722                   | 9068                      | 148-2214                  | 2215-9068                    | Yes                      |
| AFF3        | NM_001025108             | 56                 | 21                   | 76                 | 5915                     | 5860                   | 8136                      | 145-3900                  | 3901-8136                    | Yes                      |
| AFMID       | NM_001010982             | 48                 | 20                   | 67                 | 1457                     | 1410                   | 1755                      | 55-966                    | 967-1755                     | Yes                      |
| AGMAT       | NM_024758.4              | 47                 | 21                   | 67                 | 1720                     | 1674                   | 3154                      | 144-1202                  | 1203-3154                    | No                       |
| AGO1        | XM_005270746             | 57                 | 20                   | 76                 | 11374                    | 11318                  | 12559                     | Jan-56                    | 2557-12559                   | No                       |
| AHCYL2      | NM_001130720             | 58                 | 21                   | 78                 | 4494                     | 4437                   | 5072                      | 64-1896                   | 1897-5072                    | Yes                      |
| AHR         | NM_001621.4              | 67                 | 10                   | 76                 | 4880                     | 4814                   | 6247                      | 614-3160                  | 3161-6247                    | Yes                      |
| AHSA1       | XM_005267271             | 39                 | 24                   | 62                 | 1115                     | 1077                   | 1138                      | 158-1024                  | 1025-1138                    | No                       |
| AIFM2       | NM_001198696             | 33                 | 267                  | 299                | 2190                     | 2158                   | 3256                      | 218-1339                  | 1340-3256                    | No                       |
| AIG1        | NM_001286588             | 47                 | 22                   | 68                 | 2282                     | 2236                   | 3715                      | 85-489                    | 490-3715                     | Yes                      |
| AIM1        | NM_001624.2              | 44                 | 18                   | 61                 | 6460                     | 6417                   | 7553                      | 488-5659                  | 5660-7553                    | Yes                      |
| AK2         | NM_001625.3              | 48                 | 21                   | 68                 | 1213                     | 1166                   | 2759                      | 84-803                    | 804-2759                     | Yes                      |
| AK3         | NM_001199852             | 31                 | 269                  | 299                | 3046                     | 3016                   | 4213                      | 223-786                   | 787-4213                     | Yes                      |
| AKAP5       | NM_004857.3              | 34                 | 1                    | 34                 | 3434                     | 3401                   | 6487                      | 379-1662                  | 1663-6487                    | Yes                      |
| AKIP1       | NM_001206646             | 57                 | 1                    | 57                 | 948                      | 892                    | 1227                      | 77-628                    | 629-1227                     | No                       |
| AKNA        | NM_030767.4              | 43                 | 10                   | 52                 | 5902                     | 5860                   | 7387                      | 163-4482                  | 4483-7387                    | No                       |
| AKR7A2      | NM_003689.3              | 32                 | 37                   | 68                 | 2170                     | 2139                   | 2619                      | 23-1102                   | 1103-2619                    | No                       |

|           |              |    |     |     |      |      |       |          |            |     |
|-----------|--------------|----|-----|-----|------|------|-------|----------|------------|-----|
| ALDH1B1   | NM_000692.4  | 39 | 257 | 295 | 2779 | 2741 | 3088  | 154-1707 | 1708-3088  | Yes |
| ALDH1L2   | NM_001034173 | 33 | 267 | 299 | 5923 | 5891 | 7555  | 128-2899 | 2900-7555  | No  |
| ALDH6A1   | NM_001278593 | 56 | 21  | 76  | 4109 | 4054 | 4662  | 100-1668 | 1669-4662  | No  |
| ALDH7A1   | NM_001182.4  | 48 | 21  | 68  | 4374 | 4327 | 4953  | 193-1812 | 1813-4953  | Yes |
| ALG1      | NM_019109.4  | 36 | 32  | 67  | 3354 | 3319 | 3946  | 42-1436  | 1437-3946  | Yes |
| ALG10B    | NM_00101362C | 46 | 31  | 76  | 4514 | 4469 | 10091 | 140-1561 | 1562-10091 | Yes |
| ALG9      | NM_00107769C | 50 | 18  | 67  | 5003 | 4954 | 6137  | 100-1935 | 1936-6137  | No  |
| ALOX15    | NM_001140.3  | 56 | 20  | 75  | 2501 | 2446 | 2707  | 15-2003  | 2004-2707  | No  |
| ALS2      | NM_001135745 | 43 | 25  | 67  | 2161 | 2119 | 2908  | 357-1547 | 1548-2908  | Yes |
| AMER2     | NM_152704.3  | 48 | 20  | 67  | 8306 | 8259 | 10619 | 665-2680 | 2681-10619 | No  |
| AMER3     | NM_001105193 | 67 | 10  | 76  | 4753 | 4687 | 6236  | 175-2760 | 2761-6236  | No  |
| ANAPC16   | NM_001242546 | 42 | 20  | 61  | 1996 | 1955 | 3578  | 493-825  | 826-3578   | No  |
| ANGEL2    | NM_144567.3  | 67 | 10  | 76  | 3659 | 3593 | 4668  | 156-1790 | 1791-4668  | Yes |
| ANKRD40   | NM_052855.3  | 58 | 10  | 67  | 3366 | 3309 | 4169  | 256-1362 | 1363-4169  | Yes |
| ANKRD42   | XM_005273971 | 56 | 21  | 76  | 2601 | 2546 | 3767  | 960-1652 | 1653-3767  | Yes |
| ANKRD6    | NM_001242809 | 43 | 256 | 298 | 4000 | 3958 | 5355  | 342-2525 | 2526-5355  | Yes |
| ANKS4B    | NM_145865.2  | 38 | 41  | 78  | 1841 | 1804 | 2906  | 44-1297  | 1298-2906  | No  |
| ANO6      | NM_001142679 | 31 | 20  | 50  | 3571 | 3541 | 3591  | 336-3125 | 3126-3591  | Yes |
| ANTXR2    | NM_00128678C | 35 | 40  | 74  | 5914 | 5880 | 7221  | 158-1393 | 1394-7221  | Yes |
| AP1S3     | NM_001039569 | 72 | 5   | 76  | 3137 | 3066 | 4005  | 153-617  | 618-4005   | Yes |
| AP3S2     | NM_005829.4  | 37 | 257 | 293 | 4131 | 4095 | 5934  | 437-1018 | 1019-5934  | Yes |
| AP4E1     | NM_001252127 | 67 | 1   | 67  | 5929 | 5863 | 6791  | 356-3544 | 3545-6791  | Yes |
| AP4S1     | NM_001128126 | 41 | 257 | 297 | 1662 | 1622 | 4260  | 390-824  | 825-4260   | Yes |
| APAF1     | NM_001160.2  | 40 | 40  | 79  | 5289 | 5250 | 7042  | 578-4162 | 4163-7042  | Yes |
| APBB2     | NM_00116605C | 57 | 20  | 76  | 8548 | 8492 | 9001  | 631-2907 | 2908-9001  | Yes |
| APOBEC3F  | NM_145298.5  | 43 | 5   | 47  | 3111 | 3069 | 4706  | 294-1415 | 1416-4706  | Yes |
| APOL1     | NM_00113654C | 48 | 20  | 67  | 1606 | 1559 | 2924  | 208-1404 | 1405-2924  | No  |
| APOL2     | NM_030882.2  | 36 | 255 | 290 | 1482 | 1447 | 2545  | 337-1350 | 1351-2545  | Yes |
| APOL6     | NM_030641.3  | 39 | 260 | 298 | 8059 | 8021 | 10156 | 295-1326 | 1327-10156 | Yes |
| APOLD1    | NM_001130415 | 56 | 22  | 77  | 3418 | 3363 | 4752  | 85-924   | 925-4752   | Yes |
| APOOL     | NM_198450.5  | 58 | 10  | 67  | 2411 | 2354 | 6479  | 22-828   | 829-6479   | Yes |
| APPBP2    | NM_001282476 | 45 | 20  | 64  | 5558 | 5514 | 6410  | 434-1978 | 1979-6410  | Yes |
| APPL1     | NM_012096.2  | 57 | 1   | 57  | 5353 | 5297 | 6061  | 148-2277 | 2278-6061  | Yes |
| AQP6      | NM_001652.3  | 57 | 20  | 76  | 1894 | 1838 | 2654  | 338-1186 | 1187-2654  | No  |
| ARCN1     | NM_001142281 | 33 | 267 | 299 | 1996 | 1964 | 3768  | 162-1433 | 1434-3768  | Yes |
| ARFGEF1   | XM_005251136 | 33 | 267 | 299 | 6476 | 6444 | 7528  | 82-5484  | 5485-7528  | Yes |
| ARGFX     | NM_001012659 | 39 | 40  | 78  | 4078 | 4040 | 5065  | 96-1043  | 1044-5065  | No  |
| ARHGAP1   | NM_004308.3  | 43 | 25  | 67  | 2693 | 2651 | 3460  | 165-1484 | 1485-3460  | Yes |
| ARHGAP11A | NM_001286479 | 49 | 4   | 52  | 3442 | 3394 | 5157  | 549-3053 | 3054-5157  | Yes |
| ARHGAP18  | XM_005267212 | 48 | 21  | 68  | 4169 | 4122 | 4359  | 135-1991 | 1992-4359  | Yes |
| ARHGAP26  | NM_001135608 | 49 | 19  | 67  | 5202 | 5154 | 8876  | 36-2315  | 2316-8876  | Yes |

|          |              |    |     |     |       |       |       |           |            |     |
|----------|--------------|----|-----|-----|-------|-------|-------|-----------|------------|-----|
| ARHGEF26 | NM_001251962 | 40 | 28  | 67  | 3786  | 3747  | 5254  | 285-2900  | 2901-5254  | No  |
| ARL10    | XM_005265890 | 32 | 21  | 52  | 1045  | 1014  | 1625  | 91-921    | 922-1625   | Yes |
| ARL17A   | NM_001113738 | 67 | 10  | 76  | 3739  | 3673  | 5273  | 140-673   | 674-5273   | No  |
| ARNTL2   | NM_001248002 | 43 | 10  | 52  | 5037  | 4995  | 7369  | 220-2088  | 2089-7369  | Yes |
| ARPP19   | NM_006628.4  | 38 | 20  | 57  | 4037  | 4000  | 5162  | 125-463   | 464-5162   | Yes |
| ARSA     | NM_000487.5  | 42 | 257 | 298 | 3212  | 3171  | 4325  | 395-1924  | 1925-4325  | No  |
| ARSB     | NM_000046.3  | 38 | 30  | 67  | 5550  | 5513  | 6076  | 1287-2888 | 2889-6076  | Yes |
| ARSD     | NM_001669.3  | 33 | 267 | 299 | 2241  | 2209  | 5199  | 101-1882  | 1883-5199  | No  |
| AS3MT    | NM_020682.3  | 59 | 18  | 76  | 1908  | 1850  | 2477  | 141-1268  | 1269-2477  | Yes |
| ASB16    | NM_080863.4  | 33 | 267 | 299 | 1743  | 1711  | 2139  | 85-1446   | 1447-2139  | No  |
| ASB6     | NM_001202403 | 33 | 267 | 299 | 2640  | 2608  | 4570  | 171-1349  | 1350-4570  | No  |
| ATAD3C   | NM_001039211 | 31 | 48  | 78  | 3328  | 3298  | 3859  | 996-2231  | 2232-3859  | No  |
| ATF7IP2  | NM_00125616C | 49 | 1   | 49  | 2884  | 2836  | 3653  | 271-1902  | 1903-3653  | Yes |
| ATG12    | NM_001277783 | 50 | 18  | 67  | 2401  | 2352  | 4193  | 300-524   | 525-4193   | Yes |
| ATG14    | NM_014924.4  | 43 | 256 | 298 | 3433  | 3391  | 4760  | 37-1515   | 1516-4760  | No  |
| ATL3     | XM_005273890 | 47 | 21  | 67  | 5106  | 5060  | 7278  | 260-2041  | 2042-7278  | Yes |
| ATM      | NM_000051.3  | 57 | 20  | 76  | 11180 | 11124 | 13147 | 386-9556  | 9557-13147 | Yes |
| ATP1B2   | NM_001678.3  | 67 | 1   | 67  | 2381  | 2315  | 3350  | 584-1456  | 1457-3350  | No  |
| ATP1B4   | NM_001142447 | 40 | 40  | 79  | 3234  | 3195  | 4773  | 85-1158   | 1159-4773  | No  |
| ATP6VOA2 | NM_012463.3  | 68 | 9   | 76  | 3463  | 3396  | 6550  | 249-2819  | 2820-6550  | Yes |
| ATP6VOD2 | NM_152565.1  | 35 | 18  | 52  | 2060  | 2026  | 2370  | 70-1122   | 1123-2370  | No  |
| ATP6V1A  | NM_001690.3  | 58 | 10  | 67  | 2732  | 2675  | 4607  | 109-1962  | 1963-4607  | Yes |
| ATP6V1C1 | NM_001695.4  | 55 | 21  | 75  | 4407  | 4354  | 5704  | 246-1394  | 1395-5704  | Yes |
| ATP7A    | NM_000052.6  | 32 | 21  | 52  | 5847  | 5816  | 8540  | 202-4704  | 4705-8540  | Yes |
| ATP8B2   | NM_020452.3  | 59 | 18  | 76  | 4774  | 4716  | 5872  | Jan-72    | 3673-5872  | Yes |
| ATXN3    | NM_001127696 | 59 | 18  | 76  | 5741  | 5683  | 6878  | 70-1110   | 1111-6878  | Yes |
| AUH      | XM_005252072 | 42 | 257 | 298 | 982   | 942   | 1105  | 36-803    | 804-1105   | Yes |
| AUNIP    | NM_024037.2  | 73 | 4   | 76  | 1694  | 1622  | 2178  | 102-1175  | 1176-2178  | No  |
| AVL9     | XM_005249668 | 33 | 267 | 299 | 3258  | 3226  | 6988  | 222-2180  | 2181-6988  | Yes |
| AVPR1A   | NM_000706.4  | 43 | 25  | 67  | 5087  | 5045  | 7844  | 1975-3231 | 3232-7844  | No  |
| B3GALNT2 | NM_152490.3  | 33 | 267 | 299 | 3927  | 3895  | 4755  | 230-1732  | 1733-4755  | Yes |
| B3GAT3   | XM_005273904 | 57 | 1   | 57  | 1259  | 1203  | 1600  | 208-1155  | 1156-1600  | Yes |
| B4GALT5  | NM_004776.3  | 48 | 21  | 68  | 2932  | 2885  | 4743  | 195-1361  | 1362-4743  | Yes |
| BAG5     | NM_001015048 | 49 | 19  | 67  | 3527  | 3479  | 4866  | 228-1571  | 1572-4866  | Yes |
| BBIP1    | NM_001195304 | 58 | 10  | 67  | 1438  | 1381  | 2368  | 303-614   | 615-2368   | No  |
| BCKDHB   | NM_183050.2  | 48 | 20  | 67  | 1591  | 1544  | 3712  | 68-1246   | 1247-3712  | Yes |
| BCL2L15  | NM_001010922 | 57 | 1   | 57  | 1307  | 1251  | 4986  | 173-664   | 665-4986   | Yes |
| BDH1     | NM_004051.4  | 39 | 29  | 67  | 2068  | 2030  | 3394  | 251-1282  | 1283-3394  | No  |
| BET1     | XM_005250109 | 48 | 18  | 65  | 2437  | 2390  | 3604  | 166-549   | 550-3604   | Yes |
| BLOC1S2  | NM_001001342 | 33 | 267 | 299 | 2350  | 2318  | 2722  | 226-525   | 526-2722   | Yes |
| BLOC1S3  | NM_212550.3  | 44 | 256 | 299 | 1587  | 1544  | 2617  | 97-705    | 706-2617   | Yes |

|                |              |    |     |     |      |      |      |           |           |     |
|----------------|--------------|----|-----|-----|------|------|------|-----------|-----------|-----|
| BLOC1S4        | NM_018366.2  | 55 | 24  | 78  | 1036 | 982  | 1546 | 96-749    | 750-1546  | No  |
| BMP3           | NM_001201.2  | 37 | 21  | 57  | 4683 | 4647 | 5734 | 321-1739  | 1740-5734 | No  |
| BMP8A          | NM_181809.3  | 33 | 10  | 42  | 4612 | 4580 | 5642 | 347-1555  | 1556-5642 | No  |
| BNIP2          | XM_005254607 | 47 | 11  | 57  | 4308 | 4262 | 6356 | 90-1433   | 1434-6356 | Yes |
| BNIP1          | NM_001159642 | 50 | 4   | 52  | 1932 | 1883 | 2412 | 672-1499  | 1500-2412 | No  |
| BOLA2          | XM_005255415 | 62 | 5   | 66  | 1888 | 1827 | 3369 | 379-1230  | 1231-3369 | No  |
| BPNT1          | NM_001286149 | 53 | 5   | 57  | 1784 | 1733 | 2337 | 214-975   | 976-2337  | Yes |
| BRIP1          | NM_032043.2  | 47 | 21  | 67  | 4346 | 4300 | 8166 | 307-4056  | 4057-8166 | Yes |
| BROX           | XM_005273065 | 47 | 11  | 57  | 1915 | 1869 | 3868 | 1-1395    | 1396-3868 | No  |
| BTF3L4         | NM_001136497 | 40 | 28  | 67  | 2773 | 2734 | 4576 | 316-618   | 619-4576  | Yes |
| BTN3A1         | NM_001145008 | 42 | 35  | 76  | 2878 | 2837 | 3278 | 369-1754  | 1755-3278 | No  |
| BVES           | NM_001199563 | 34 | 1   | 34  | 2160 | 2127 | 5599 | 218-1300  | 1301-5599 | Yes |
| C10orf111      | NM_153244.1  | 48 | 10  | 57  | 923  | 876  | 1785 | 275-742   | 743-1785  | Yes |
| C10orf67       | NM_153714.2  | 60 | 19  | 78  | 1560 | 1501 | 2943 | 67-624    | 625-2943  | No  |
| C10orf76       | NM_024541.2  | 43 | 256 | 298 | 2782 | 2740 | 4101 | 103-2172  | 2173-4101 | Yes |
| C11orf31       | NM_170746.2  | 40 | 28  | 67  | 1172 | 1133 | 1294 | 347-715   | 716-1294  | No  |
| C11orf44       | NM_001271983 | 54 | 21  | 74  | 465  | 412  | 3547 | 24-392    | 393-3547  | No  |
| C11orf58       | NM_014267.5  | 43 | 256 | 298 | 1956 | 1914 | 3980 | 179-730   | 731-3980  | Yes |
| C11orf83       | NM_001085372 | 30 | 28  | 57  | 900  | 871  | 1959 | 93-374    | 375-1959  | No  |
| C12orf49       | XM_005253937 | 49 | 28  | 76  | 3758 | 3710 | 4950 | 97-624    | 625-4950  | Yes |
| C12orf5        | NM_020375.2  | 35 | 256 | 290 | 2993 | 2959 | 8237 | 80-892    | 893-8237  | Yes |
| C14orf119      | NM_017924.3  | 49 | 20  | 68  | 2193 | 2145 | 2960 | 148-570   | 571-2960  | Yes |
| C15orf38       | NM_001282380 | 34 | 10  | 43  | 5059 | 5026 | 6503 | 833-1225  | 1226-6503 | Yes |
| C15orf38-AP3S2 | NM_001199058 | 37 | 257 | 293 | 4453 | 4417 | 6256 | 156-1340  | 1341-6256 | No  |
| C15orf40       | NM_001160113 | 60 | 18  | 77  | 885  | 826  | 998  | 35-538    | 539-998   | Yes |
| C15orf59       | XM_005254369 | 45 | 5   | 49  | 3870 | 3826 | 6980 | 1613-2494 | 2495-6980 | No  |
| C16orf54       | NM_175900.3  | 61 | 19  | 79  | 2239 | 2179 | 2686 | 110-784   | 785-2686  | No  |
| C17orf103      | NM_152914.2  | 47 | 21  | 67  | 3993 | 3947 | 4787 | 3-344     | 345-4787  | No  |
| C17orf75       | NM_022344.3  | 42 | 10  | 51  | 4271 | 4230 | 4599 | 71-1261   | 1262-4599 | Yes |
| C17orf85       | NM_001114118 | 58 | 10  | 67  | 5366 | 5309 | 8197 | 29-1891   | 1892-8197 | Yes |
| C19orf35       | NM_198532.2  | 57 | 1   | 57  | 2376 | 2320 | 2570 | 101-1522  | 1523-2570 | No  |
| C1GALT1        | NM_020156.4  | 50 | 14  | 63  | 2916 | 2867 | 6244 | 224-1315  | 1316-6244 | Yes |
| C1QTNF3        | NM_030945.3  | 57 | 20  | 76  | 2464 | 2408 | 3624 | 142-882   | 883-3624  | Yes |
| C1QTNF6        | NM_031910.3  | 48 | 20  | 67  | 1541 | 1494 | 2954 | 78-914    | 915-2954  | No  |
| C1orf106       | NM_001142569 | 58 | 10  | 67  | 3076 | 3019 | 4225 | 362-2098  | 2099-4225 | No  |
| C1orf174       | NM_207356.2  | 58 | 19  | 76  | 1232 | 1175 | 1705 | 108-839   | 840-1705  | Yes |
| C1orf210       | NM_001164829 | 73 | 4   | 76  | 1168 | 1096 | 1424 | 164-505   | 506-1424  | No  |
| C1orf229       | NM_207401.1  | 35 | 256 | 290 | 1877 | 1843 | 2258 | 194-907   | 908-2258  | No  |
| C20orf203      | NM_182584.2  | 35 | 257 | 291 | 1958 | 1924 | 4803 | 264-848   | 849-4803  | No  |
| C2CD2          | NM_015500.1  | 58 | 10  | 67  | 4614 | 4557 | 6349 | 243-2333  | 2334-6349 | No  |
| C3orf33        | NM_173657.1  | 56 | 21  | 76  | 1800 | 1745 | 1931 | 271-1026  | 1027-1931 | Yes |

|          |              |    |     |     |      |      |       |          |            |     |
|----------|--------------|----|-----|-----|------|------|-------|----------|------------|-----|
| C3orf70  | NM_001025266 | 67 | 10  | 76  | 2674 | 2608 | 5901  | 192-944  | 945-5901   | Yes |
| C3orf72  | NM_001040061 | 42 | 257 | 298 | 2654 | 2613 | 4075  | 132-659  | 660-4075   | No  |
| C4orf40  | NM_214711.3  | 47 | 21  | 67  | 1645 | 1599 | 4814  | 190-849  | 850-4814   | No  |
| C5orf22  | NM_018356.2  | 33 | 267 | 299 | 2074 | 2042 | 3616  | 128-1456 | 1457-3616  | Yes |
| C5orf60  | NM_001142306 | 35 | 256 | 290 | 913  | 879  | 1210  | 27-860   | 861-1210   | No  |
| C5orf64  | NM_173667.2  | 39 | 29  | 67  | 1288 | 1250 | 2970  | 76-468   | 469-2970   | No  |
| C6orf141 | XM_005248851 | 49 | 19  | 67  | 2004 | 1956 | 2134  | 126-860  | 861-2134   | No  |
| C6orf25  | NM_025260.3  | 54 | 4   | 57  | 1199 | 1146 | 2435  | 41-754   | 755-2435   | No  |
| C7       | NM_000587.2  | 34 | 257 | 290 | 3276 | 3243 | 4034  | 115-2646 | 2647-4034  | No  |
| C8orf37  | NM_177965.3  | 49 | 4   | 52  | 2690 | 2642 | 3378  | 46-669   | 670-3378   | Yes |
| C9orf3   | NM_001193331 | 47 | 30  | 76  | 2783 | 2737 | 3851  | 219-1919 | 1920-3851  | Yes |
| C9orf41  | NM_152420.1  | 36 | 43  | 78  | 2007 | 1972 | 2219  | 154-1383 | 1384-2219  | Yes |
| C9orf9   | XM_005272164 | 48 | 20  | 67  | 1765 | 1718 | 2245  | 158-826  | 827-2245   | No  |
| C9orf91  | NM_153045.3  | 40 | 40  | 79  | 4002 | 3963 | 4413  | 218-1246 | 1247-4413  | Yes |
| CA13     | NM_198584.2  | 60 | 19  | 78  | 1440 | 1381 | 3855  | 343-1131 | 1132-3855  | Yes |
| CA5B     | NM_007220.3  | 33 | 267 | 299 | 2510 | 2478 | 6032  | 118-1071 | 1072-6032  | No  |
| CACNG8   | NM_031895.5  | 63 | 5   | 67  | 5763 | 5701 | 8751  | 108-1385 | 1386-8751  | No  |
| CALCOCO2 | NM_001261390 | 47 | 21  | 67  | 2716 | 2670 | 3754  | 102-1514 | 1515-3754  | Yes |
| CAMLG    | NM_001745.3  | 64 | 4   | 67  | 1923 | 1860 | 2255  | 142-1032 | 1033-2255  | Yes |
| CARD6    | NM_032587.3  | 48 | 10  | 57  | 3488 | 3441 | 4097  | 76-3189  | 3190-4097  | Yes |
| CARD8    | NM_001184900 | 40 | 40  | 79  | 4314 | 4275 | 5291  | 44-1657  | 1658-5291  | Yes |
| CARHSP1  | NM_001042476 | 43 | 10  | 52  | 2019 | 1977 | 3043  | 361-804  | 805-3043   | Yes |
| CASP10   | NM_001206524 | 48 | 21  | 68  | 2102 | 2055 | 5705  | 419-1786 | 1787-5705  | Yes |
| CASP2    | NM_001224.4  | 57 | 1   | 57  | 2764 | 2708 | 4057  | 89-1027  | 1028-4057  | Yes |
| CASP8    | NM_001080124 | 34 | 256 | 289 | 1712 | 1679 | 2750  | 236-1630 | 1631-2750  | Yes |
| CASP9    | NM_001229.4  | 56 | 21  | 76  | 2807 | 2752 | 3038  | 246-1496 | 1497-3038  | No  |
| CASS4    | NM_001164114 | 37 | 21  | 57  | 2847 | 2811 | 2993  | 202-2400 | 2401-2993  | Yes |
| CBFA2T2  | NM_001032999 | 64 | 4   | 67  | 4733 | 4670 | 7319  | 147-1934 | 1935-7319  | Yes |
| CBFB     | NM_001755.2  | 61 | 20  | 79  | 1611 | 1552 | 3181  | 262-810  | 811-3181   | Yes |
| CBL      | NM_005188.3  | 33 | 20  | 52  | 7852 | 7820 | 11241 | 143-2863 | 2864-11241 | Yes |
| CBX5     | NM_001127321 | 43 | 256 | 298 | 6880 | 6838 | 11525 | 121-696  | 697-11525  | Yes |
| CC2D1B   | NM_032449.2  | 50 | 18  | 67  | 4492 | 4443 | 5670  | 152-2728 | 2729-5670  | No  |
| CCDC113  | NM_001142302 | 57 | 20  | 76  | 3427 | 3371 | 5142  | 80-1051  | 1052-5142  | No  |
| CCDC117  | NM_001284263 | 47 | 21  | 67  | 1919 | 1873 | 3937  | 177-962  | 963-3937   | Yes |
| CCDC120  | NM_001163321 | 57 | 1   | 57  | 3292 | 3236 | 3652  | 214-2304 | 2305-3652  | Yes |
| CCDC122  | NM_144974.3  | 57 | 1   | 57  | 1657 | 1601 | 2024  | 260-1081 | 1082-2024  | Yes |
| CCDC125  | NM_176816.3  | 64 | 4   | 67  | 1889 | 1826 | 3624  | 44-1579  | 1580-3624  | Yes |
| CCDC134  | XM_005261749 | 36 | 1   | 36  | 6029 | 5994 | 6850  | 152-502  | 503-6850   | Yes |
| CCDC141  | NM_173648.3  | 49 | 19  | 67  | 6538 | 6490 | 9127  | 119-4711 | 4712-9127  | No  |
| CCDC50   | NM_174908.3  | 34 | 19  | 52  | 2634 | 2601 | 8421  | 591-1511 | 1512-8421  | Yes |
| CCDC68   | NM_001143829 | 32 | 31  | 62  | 3541 | 3510 | 4033  | 173-1180 | 1181-4033  | No  |

|            |              |    |     |     |      |      |       |          |            |     |
|------------|--------------|----|-----|-----|------|------|-------|----------|------------|-----|
| CCDC8      | NM_032040.4  | 39 | 40  | 78  | 2748 | 2710 | 3334  | 853-2469 | 2470-3334  | No  |
| CCL15      | XM_005258019 | 40 | 28  | 67  | 1053 | 1014 | 1368  | 494-835  | 836-1368   | No  |
| CCL16      | NM_004590.2  | 59 | 10  | 68  | 815  | 757  | 1497  | 68-430   | 431-1497   | No  |
| CCL22      | NM_002990.4  | 56 | 21  | 76  | 1350 | 1295 | 2933  | 35-316   | 317-2933   | No  |
| CCNDBP1    | NM_012142.4  | 47 | 22  | 68  | 2903 | 2857 | 3669  | 232-1314 | 1315-3669  | Yes |
| CCNF       | NM_001761.2  | 40 | 18  | 57  | 3827 | 3788 | 4287  | 89-2449  | 2450-4287  | Yes |
| CCNY       | NM_001282852 | 35 | 18  | 52  | 4387 | 4353 | 4636  | 181-1131 | 1132-4636  | Yes |
| CCNYL1     | NM_00114230C | 70 | 23  | 91  | 2365 | 2296 | 3773  | 358-1284 | 1285-3773  | No  |
| CCPG1      | NM_004748.4  | 44 | 1   | 44  | 4608 | 4565 | 7089  | 540-2813 | 2814-7089  | Yes |
| CCRN4L     | NM_012118.3  | 38 | 20  | 57  | 1706 | 1669 | 1984  | 224-1519 | 1520-1984  | Yes |
| CCSER2     | NM_00128424C | 58 | 10  | 67  | 4732 | 4675 | 7675  | 260-3403 | 3404-7675  | No  |
| CD209      | NM_001144893 | 58 | 10  | 67  | 1593 | 1536 | 3920  | 68-874   | 875-3920   | No  |
| CD24       | NM_013230.2  | 33 | 267 | 299 | 1400 | 1368 | 2194  | 111-353  | 354-2194   | No  |
| CD300LG    | NM_145273.3  | 67 | 10  | 76  | 2330 | 2264 | 2799  | 70-1068  | 1069-2799  | No  |
| CD302      | NM_001198763 | 46 | 22  | 67  | 2914 | 2869 | 3821  | 58-582   | 583-3821   | Yes |
| CD3EAP     | NM_012099.1  | 48 | 29  | 76  | 2839 | 2792 | 3286  | 489-2021 | 2022-3286  | Yes |
| CD3G       | NM_000073.2  | 59 | 18  | 76  | 1206 | 1148 | 1311  | 81-629   | 630-1311   | No  |
| CDC5L      | NM_001253.3  | 33 | 267 | 299 | 6087 | 6055 | 6432  | 311-2719 | 2720-6432  | Yes |
| CDC6       | NM_001254.3  | 49 | 4   | 52  | 2407 | 2359 | 3053  | 211-1893 | 1894-3053  | Yes |
| CDCP1      | NM_022842.4  | 49 | 28  | 76  | 4494 | 4446 | 6027  | 136-2646 | 2647-6027  | No  |
| CDH1       | NM_004360.3  | 32 | 267 | 298 | 3443 | 3412 | 4815  | 125-2773 | 2774-4815  | Yes |
| CDH17      | NM_001144663 | 34 | 257 | 290 | 2814 | 2781 | 3699  | 127-2625 | 2626-3699  | No  |
| CDH6       | NM_004932.3  | 57 | 1   | 57  | 6280 | 6224 | 8571  | 361-2733 | 2734-8571  | No  |
| CDK19      | NM_015076.3  | 58 | 10  | 67  | 4468 | 4411 | 6139  | 74-1582  | 1583-6139  | No  |
| CDKAL1     | NM_017774.3  | 67 | 10  | 76  | 2449 | 2383 | 3272  | 168-1907 | 1908-3272  | Yes |
| CDKN2AIPNL | NM_080656.2  | 35 | 256 | 290 | 862  | 828  | 1270  | 54-404   | 405-1270   | Yes |
| CDON       | NM_001243597 | 50 | 18  | 67  | 4571 | 4522 | 8116  | 129-3992 | 3993-8116  | Yes |
| CEACAM8    | NM_001816.3  | 34 | 256 | 289 | 1509 | 1476 | 2333  | 103-1152 | 1153-2333  | No  |
| CECR1      | NM_001282225 | 33 | 267 | 299 | 3363 | 3331 | 4510  | 277-1812 | 1813-4510  | No  |
| CELF3      | NM_001172648 | 37 | 25  | 61  | 3608 | 3572 | 5352  | 695-1951 | 1952-5352  | No  |
| CENPH      | NM_022909.3  | 35 | 256 | 290 | 1094 | 1060 | 1405  | 88-831   | 832-1405   | Yes |
| CENPN      | NM_001100624 | 43 | 256 | 298 | 2619 | 2577 | 4663  | 791-1810 | 1811-4663  | Yes |
| CEP104     | NM_014704.3  | 56 | 21  | 76  | 4815 | 4760 | 6458  | 360-3137 | 3138-6458  | No  |
| CEP41      | NM_00125716C | 55 | 21  | 75  | 2145 | 2091 | 3315  | 245-409  | 410-3315   | No  |
| CEP44      | NM_001040157 | 48 | 20  | 67  | 3158 | 3111 | 4535  | 415-1587 | 1588-4535  | No  |
| CEP63      | NM_001042383 | 49 | 20  | 68  | 3865 | 3817 | 5326  | 346-1833 | 1834-5326  | Yes |
| CEP97      | XM_005247758 | 67 | 10  | 76  | 7389 | 7323 | 7770  | 86-2761  | 2762-7770  | Yes |
| CFLAR      | NM_001127183 | 48 | 20  | 67  | 3378 | 3331 | 10668 | 494-1936 | 1937-10668 | Yes |
| CHEK1      | NM_001114121 | 56 | 21  | 76  | 2479 | 2424 | 2699  | 898-2328 | 2329-2699  | Yes |
| CHMP1B     | NM_020412.4  | 47 | 21  | 67  | 2577 | 2531 | 3060  | 123-722  | 723-3060   | No  |
| CHP1       | NM_007236.4  | 55 | 22  | 76  | 2344 | 2290 | 3230  | 145-732  | 733-3230   | No  |

|          |              |    |     |     |      |      |       |           |            |     |
|----------|--------------|----|-----|-----|------|------|-------|-----------|------------|-----|
| CHRA1    | NM_017444.5  | 48 | 20  | 67  | 1643 | 1596 | 2504  | 203-598   | 599-2504   | Yes |
| CHRFAM7A | XM_005254750 | 33 | 10  | 42  | 3423 | 3391 | 3701  | 1009-1974 | 1975-3701  | No  |
| CHRNA7   | NM_000746.5  | 33 | 10  | 42  | 3068 | 3036 | 3356  | 113-1621  | 1622-3356  | Yes |
| CHRNA4   | NM_000750.3  | 47 | 22  | 68  | 2124 | 2078 | 2448  | 113-1609  | 1610-2448  | Yes |
| CHST1    | NM_003654.5  | 35 | 256 | 290 | 2981 | 2947 | 3947  | 706-1941  | 1942-3947  | No  |
| CHST6    | NM_021615.4  | 47 | 21  | 67  | 3584 | 3538 | 6885  | 181-1368  | 1369-6885  | No  |
| CHSY1    | NM_014918.4  | 43 | 256 | 298 | 3520 | 3478 | 4567  | 477-2885  | 2886-4567  | Yes |
| CIITA    | NM_000246.3  | 50 | 18  | 67  | 4051 | 4002 | 4654  | 134-3526  | 3527-4654  | No  |
| CISD2    | NM_001008388 | 47 | 22  | 68  | 5286 | 5240 | 5892  | 108-515   | 516-5892   | Yes |
| CLCC1    | NM_00104821C | 46 | 22  | 67  | 2194 | 2149 | 4835  | 141-1796  | 1797-4835  | Yes |
| CLCN3    | NM_001243372 | 65 | 10  | 74  | 4909 | 4845 | 6142  | 560-2935  | 2936-6142  | Yes |
| CLCN5    | NM_000084.4  | 33 | 20  | 52  | 6733 | 6701 | 9515  | 249-2489  | 2490-9515  | Yes |
| CLDN11   | NM_001185056 | 40 | 40  | 79  | 1140 | 1101 | 2431  | 125-496   | 497-2431   | Yes |
| CLEC17A  | NM_001204118 | 56 | 23  | 78  | 1679 | 1624 | 2162  | 78-1214   | 1215-2162  | No  |
| CLEC19A  | NM_00125672C | 30 | 261 | 290 | 1228 | 1199 | 2511  | 70-630    | 631-2511   | No  |
| CLEC7A   | NM_022570.4  | 67 | 1   | 67  | 1867 | 1801 | 2484  | 188-793   | 794-2484   | No  |
| CLMN     | NM_024734.3  | 58 | 21  | 78  | 9709 | 9652 | 12750 | 117-3125  | 3126-12750 | Yes |
| CLSPN    | NM_001190481 | 33 | 267 | 299 | 4384 | 4352 | 8292  | 81-3908   | 3909-8292  | Yes |
| CNBP     | NM_001127192 | 37 | 21  | 57  | 2728 | 2692 | 3399  | 207-746   | 747-3399   | Yes |
| CNEP1R1  | NM_001281789 | 48 | 20  | 67  | 1313 | 1266 | 2150  | 111-488   | 489-2150   | No  |
| CNN2     | NM_004368.2  | 48 | 21  | 68  | 2110 | 2063 | 2478  | 364-1293  | 1294-2478  | Yes |
| CNNM3    | NM_017623.4  | 47 | 21  | 67  | 3593 | 3547 | 4916  | 25-2148   | 2149-4916  | Yes |
| CNR2     | XM_005245737 | 58 | 10  | 67  | 3881 | 3824 | 5362  | 260-1342  | 1343-5362  | No  |
| CNTNAP2  | NM_014141.5  | 43 | 256 | 298 | 8386 | 8344 | 9894  | 517-4512  | 4513-9894  | Yes |
| COLGALT1 | XM_005260080 | 33 | 267 | 299 | 2303 | 2271 | 3338  | 4-1623    | 1624-3338  | No  |
| COQ6     | XM_005267717 | 58 | 10  | 67  | 1146 | 1089 | 2058  | 54-968    | 969-2058   | Yes |
| COQ7     | NM_001190983 | 48 | 21  | 68  | 1114 | 1067 | 2616  | 134-673   | 674-2616   | Yes |
| COX15    | NM_078470.4  | 50 | 18  | 67  | 2597 | 2548 | 7689  | 618-1850  | 1851-7689  | Yes |
| COX16    | NM_00120409C | 40 | 18  | 57  | 1276 | 1237 | 1652  | 145-393   | 394-1652   | Yes |
| COX18    | NM_173827.2  | 31 | 21  | 51  | 2227 | 2197 | 4523  | 107-1108  | 1109-4523  | Yes |
| COX6B2   | NM_144613.4  | 64 | 4   | 67  | 1381 | 1318 | 1679  | 184-450   | 451-1679   | No  |
| CPM      | NM_001005502 | 44 | 24  | 67  | 6324 | 6281 | 6651  | 44-1375   | 1376-6651  | No  |
| CPSF2    | NM_017437.2  | 73 | 4   | 76  | 4764 | 4692 | 5072  | 269-2617  | 2618-5072  | Yes |
| CPT1A    | NM_001876.3  | 45 | 23  | 67  | 4148 | 4104 | 5260  | 171-2492  | 2493-5260  | Yes |
| CR1      | NM_000573.3  | 38 | 1   | 38  | 7149 | 7112 | 8629  | 141-6260  | 6261-8629  | No  |
| CRCP     | NM_001040647 | 52 | 17  | 67  | 2460 | 2409 | 2721  | 146-493   | 494-2721   | Yes |
| CREB5    | NM_001011666 | 31 | 21  | 51  | 2625 | 2595 | 7772  | 48-1157   | 1158-7772  | Yes |
| CRIP1    | NM_014171.5  | 47 | 21  | 67  | 3166 | 3120 | 6366  | 112-417   | 418-6366   | Yes |
| CRISPLD2 | NM_031476.3  | 30 | 20  | 49  | 3912 | 3883 | 4607  | 228-1721  | 1722-4607  | No  |
| CRKL     | NM_005207.3  | 48 | 20  | 67  | 2134 | 2087 | 5336  | 510-1421  | 1422-5336  | Yes |
| CRLF3    | NM_015986.3  | 48 | 20  | 67  | 2135 | 2088 | 2954  | 110-1438  | 1439-2954  | Yes |

|          |              |    |     |     |      |      |       |           |            |     |
|----------|--------------|----|-----|-----|------|------|-------|-----------|------------|-----|
| CRLS1    | NM_001127458 | 31 | 21  | 51  | 2832 | 2802 | 3667  | 151-759   | 760-3667   | Yes |
| CRTAP    | NM_006371.4  | 33 | 267 | 299 | 1747 | 1715 | 6668  | 121-1326  | 1327-6668  | Yes |
| CRTC1    | NM_001098482 | 33 | 267 | 299 | 5403 | 5371 | 7009  | 89-2041   | 2042-7009  | Yes |
| CRX      | NM_000554.4  | 42 | 257 | 298 | 1906 | 1865 | 4482  | 205-1104  | 1105-4482  | No  |
| CTF1     | NM_001142544 | 67 | 10  | 76  | 928  | 862  | 1678  | 38-640    | 641-1678   | No  |
| CTSB     | NM_001908.3  | 59 | 18  | 76  | 2404 | 2346 | 3783  | 163-1182  | 1183-3783  | Yes |
| CTSS     | NM_001199739 | 43 | 256 | 298 | 2808 | 2766 | 3957  | 262-1107  | 1108-3957  | No  |
| CTSV     | NM_001201575 | 48 | 5   | 52  | 1744 | 1697 | 4339  | 48-1052   | 1053-4339  | No  |
| CUL2     | NM_001198777 | 31 | 269 | 299 | 3754 | 3724 | 4246  | 236-2473  | 2474-4246  | Yes |
| CXADR    | NM_001207063 | 42 | 256 | 297 | 3557 | 3516 | 5482  | 225-983   | 984-5482   | Yes |
| CXCL16   | NM_022059.2  | 33 | 267 | 299 | 1847 | 1815 | 2344  | 533-1354  | 1355-2344  | Yes |
| CXorf56  | NM_001170569 | 53 | 5   | 57  | 1168 | 1116 | 2408  | 309-830   | 831-2408   | Yes |
| CYB561D1 | NM_00113440C | 58 | 10  | 67  | 4076 | 4019 | 5010  | 62-817    | 818-5010   | No  |
| CYB5D1   | NM_144607.4  | 44 | 256 | 299 | 1678 | 1635 | 3760  | 390-1076  | 1077-3760  | No  |
| CYB5R3   | NM_000398.6  | 57 | 1   | 57  | 2372 | 2316 | 2923  | 85-990    | 991-2923   | No  |
| CYCS     | NM_018947.5  | 48 | 21  | 68  | 2388 | 2341 | 5544  | 171-488   | 489-5544   | Yes |
| CYLC2    | NM_001340.3  | 47 | 21  | 67  | 1934 | 1888 | 2189  | 71-1117   | 1118-2189  | No  |
| CYP1A2   | NM_000761.3  | 53 | 5   | 57  | 2804 | 2752 | 3127  | 65-1615   | 1616-3127  | No  |
| CYP20A1  | NM_177538.2  | 44 | 24  | 67  | 8244 | 8201 | 10943 | 623-2011  | 2012-10943 | Yes |
| CYP2B6   | NM_000767.4  | 49 | 19  | 67  | 2654 | 2607 | 3052  | 8-1483    | 1484-3052  | No  |
| CYP4V2   | NM_207352.3  | 39 | 40  | 78  | 2339 | 2301 | 4713  | 305-1882  | 1883-4713  | Yes |
| CYP51A1  | NM_000786.3  | 35 | 18  | 52  | 2656 | 2622 | 3208  | 163-1692  | 1693-3208  | Yes |
| CYP8B1   | NM_004391.2  | 59 | 18  | 76  | 2469 | 2411 | 3950  | 326-1831  | 1832-3950  | No  |
| CYTH2    | NM_004228.6  | 45 | 22  | 66  | 3945 | 3901 | 4622  | 301-1500  | 1501-4622  | No  |
| DAND5    | NM_152654.2  | 59 | 10  | 68  | 1252 | 1194 | 1732  | 44-613    | 614-1732   | No  |
| DBR1     | NM_016216.3  | 67 | 1   | 67  | 1978 | 1912 | 2690  | 155-1789  | 1790-2690  | Yes |
| DBT      | NM_001918.3  | 33 | 267 | 299 | 8594 | 8562 | 10831 | 34-1482   | 1483-10831 | Yes |
| DCAF16   | NM_017741.3  | 43 | 256 | 298 | 3144 | 3102 | 4548  | 1062-1712 | 1713-4548  | No  |
| DCAF4L1  | NM_001029955 | 43 | 256 | 298 | 2806 | 2764 | 4772  | 98-1288   | 1289-4772  | No  |
| DCDC5    | NM_020869.3  | 35 | 256 | 290 | 4278 | 4244 | 4773  | 317-2989  | 2990-4773  | Yes |
| DCP2     | NM_001242377 | 64 | 4   | 67  | 4900 | 4837 | 10093 | 225-1382  | 1383-10093 | Yes |
| DCX      | NM_000555.3  | 56 | 10  | 65  | 6561 | 6506 | 9433  | 173-1498  | 1499-9433  | No  |
| DDA1     | NM_024050.5  | 33 | 267 | 299 | 2257 | 2225 | 4078  | 128-436   | 437-4078   | Yes |
| DDI2     | XM_005246017 | 33 | 266 | 298 | 5678 | 5646 | 10604 | 214-3282  | 3283-10604 | Yes |
| DENND6A  | NM_152678.2  | 32 | 21  | 52  | 3529 | 3498 | 4679  | 72-1898   | 1899-4679  | No  |
| DENR     | NM_003677.3  | 64 | 4   | 67  | 1322 | 1259 | 3061  | 137-733   | 734-3061   | Yes |
| DEPDC5   | NM_001007188 | 55 | 25  | 79  | 2126 | 2072 | 2460  | 203-1882  | 1883-2460  | Yes |
| DES11    | NM_015704.2  | 37 | 21  | 57  | 1769 | 1733 | 3804  | 219-725   | 726-3804   | No  |
| DFFB     | NM_001282669 | 41 | 258 | 298 | 2314 | 2274 | 3120  | 338-1426  | 1427-3120  | Yes |
| DHFR     | NM_000791.3  | 67 | 1   | 67  | 2078 | 2014 | 3932  | 493-1056  | 1057-3932  | No  |
| DHX8     | XM_005257113 | 58 | 21  | 78  | 5634 | 5577 | 6682  | 77-3733   | 3734-6682  | Yes |



|          |              |    |     |     |      |      |       |           |            |     |
|----------|--------------|----|-----|-----|------|------|-------|-----------|------------|-----|
| DIEXF    | NM_014388.6  | 48 | 20  | 67  | 4422 | 4375 | 8505  | 98-2368   | 2369-8505  | No  |
| DISC1    | NM_001012957 | 34 | 19  | 52  | 5858 | 5825 | 7003  | 54-2552   | 2553-7003  | Yes |
| DNAJC14  | NM_032364.5  | 33 | 267 | 299 | 2640 | 2608 | 3330  | 205-2313  | 2314-3330  | Yes |
| DNAJC16  | NM_015291.2  | 58 | 10  | 67  | 4087 | 4030 | 6035  | 121-2469  | 2470-6035  | Yes |
| DNAJC21  | XM_005248250 | 58 | 19  | 76  | 2848 | 2791 | 3360  | 222-1622  | 1623-3360  | Yes |
| DNAJC24  | NM_181706.4  | 54 | 23  | 76  | 1326 | 1273 | 3000  | 117-566   | 567-3000   | Yes |
| DNAJC3   | NM_006260.4  | 48 | 10  | 57  | 4220 | 4174 | 5598  | 118-1632  | 1633-5598  | Yes |
| DNAJC30  | NM_032317.2  | 48 | 20  | 67  | 1625 | 1578 | 2534  | 29-709    | 710-2534   | No  |
| DNAL1    | NM_001201366 | 48 | 1   | 48  | 7278 | 7231 | 8584  | 329-784   | 785-8584   | Yes |
| DNMBP    | NM_015221.2  | 32 | 267 | 298 | 5614 | 5583 | 6419  | 93-4826   | 4827-6419  | Yes |
| DOCK5    | XM_005273651 | 39 | 40  | 78  | 3982 | 3944 | 5342  | 180-3278  | 3279-5342  | Yes |
| DPY19L4  | NM_181787.2  | 50 | 18  | 67  | 4780 | 4731 | 6234  | 125-2296  | 2297-6234  | Yes |
| DSC3     | NM_001941.3  | 44 | 255 | 298 | 4899 | 4856 | 6935  | 156-2846  | 2847-6935  | Yes |
| DSCR3    | NM_006052.1  | 47 | 21  | 67  | 1819 | 1773 | 3252  | 240-1133  | 1134-3252  | Yes |
| DSEL     | NM_032160.2  | 34 | 257 | 290 | 8558 | 8525 | 9281  | 1225-4893 | 4894-9281  | No  |
| DTD2     | NM_080664.2  | 57 | 20  | 76  | 1023 | 967  | 2696  | 82-588    | 589-2696   | No  |
| DTWD2    | NM_173666.2  | 56 | 21  | 76  | 2812 | 2757 | 4974  | 35-931    | 932-4974   | Yes |
| DTX3L    | NM_138287.3  | 32 | 20  | 51  | 2618 | 2587 | 5768  | 90-2312   | 2313-5768  | Yes |
| DUSP18   | NM_152511.3  | 39 | 40  | 78  | 1920 | 1882 | 2453  | 502-1068  | 1069-2453  | Yes |
| DUSP19   | NM_001142314 | 55 | 22  | 76  | 2386 | 2332 | 5226  | 376-876   | 877-5226   | Yes |
| DUSP4    | NM_001394.6  | 48 | 21  | 68  | 2697 | 2650 | 5625  | 473-1657  | 1658-5625  | Yes |
| DZIP1    | NM_014934.4  | 47 | 21  | 67  | 5425 | 5379 | 7441  | 856-3402  | 3403-7441  | Yes |
| E2F2     | NM_004091.3  | 67 | 1   | 67  | 4251 | 4185 | 5201  | 428-1741  | 1742-5201  | Yes |
| EDEM1    | NM_014674.2  | 54 | 21  | 74  | 2599 | 2546 | 6162  | 133-2106  | 2107-6162  | Yes |
| EEF2K    | NM_013302.3  | 49 | 28  | 76  | 3084 | 3036 | 7412  | 486-2663  | 2664-7412  | Yes |
| EFCAB2   | NM_001143943 | 39 | 40  | 78  | 1266 | 1228 | 3772  | 91-492    | 493-3772   | Yes |
| EFCAB5   | NM_001145053 | 39 | 40  | 78  | 3514 | 3476 | 3762  | 240-2810  | 2811-3762  | No  |
| EFHC1    | NM_00117242C | 58 | 20  | 77  | 2468 | 2411 | 5508  | 185-2050  | 2051-5508  | Yes |
| EFR3B    | NM_014971.1  | 38 | 42  | 79  | 4877 | 4840 | 7500  | 210-2663  | 2664-7500  | No  |
| EGF      | NM_00117813C | 61 | 18  | 78  | 5018 | 4958 | 5477  | 453-3953  | 3954-5477  | No  |
| EGLN1    | NM_022051.2  | 33 | 267 | 299 | 5408 | 5376 | 7102  | 3157-4437 | 4438-7102  | Yes |
| EHD2     | NM_014601.3  | 73 | 4   | 76  | 2883 | 2811 | 3601  | 251-1882  | 1883-3601  | No  |
| EIF1AD   | NM_001242481 | 33 | 267 | 299 | 2342 | 2310 | 2925  | 374-871   | 872-2925   | Yes |
| EIF2AK2  | NM_001135651 | 38 | 30  | 67  | 2327 | 2290 | 4127  | 324-1979  | 1980-4127  | Yes |
| EIF2S1   | NM_004094.4  | 34 | 42  | 75  | 3397 | 3364 | 4165  | 142-1089  | 1090-4165  | Yes |
| EIF2S3   | NM_001415.3  | 33 | 267 | 299 | 2896 | 2864 | 3486  | 22-1440   | 1441-3486  | Yes |
| EIF4E    | NM_001130678 | 38 | 1   | 38  | 3370 | 3333 | 3406  | 121-834   | 835-3406   | Yes |
| EIF4EBP2 | NM_004096.4  | 39 | 19  | 57  | 5329 | 5291 | 7531  | 298-660   | 661-7531   | Yes |
| EIF5A2   | NM_020390.5  | 47 | 21  | 67  | 1649 | 1603 | 5537  | 131-592   | 593-5537   | Yes |
| ELK4     | NM_001973.3  | 69 | 10  | 78  | 5893 | 5826 | 11170 | 1251-2546 | 2547-11170 | Yes |
| ELMSAN1  | NM_001043318 | 40 | 18  | 57  | 6224 | 6185 | 7656  | 340-3477  | 3478-7656  | No  |

|          |              |    |     |     |      |      |       |          |            |     |
|----------|--------------|----|-----|-----|------|------|-------|----------|------------|-----|
| ELOVL7   | NM_001104558 | 47 | 21  | 67  | 2802 | 2756 | 3851  | 150-995  | 996-3851   | Yes |
| ELP3     | NM_00128422C | 55 | 13  | 67  | 2683 | 2629 | 3135  | 265-1692 | 1693-3135  | Yes |
| EMP2     | NM_001424.4  | 58 | 19  | 76  | 3800 | 3743 | 5186  | 195-698  | 699-5186   | Yes |
| ENAH     | NM_001008493 | 33 | 267 | 299 | 9629 | 9597 | 13172 | 454-2229 | 2230-13172 | Yes |
| ENPP1    | NM_006208.2  | 35 | 256 | 290 | 6633 | 6599 | 7442  | 21-2798  | 2799-7442  | Yes |
| ENTPD1   | NM_001098175 | 49 | 28  | 76  | 4735 | 4687 | 12615 | 179-1732 | 1733-12615 | No  |
| ENTPD7   | NM_020354.3  | 39 | 40  | 78  | 3904 | 3866 | 8564  | 179-1993 | 1994-8564  | Yes |
| EOGT     | NM_001278689 | 33 | 20  | 52  | 2845 | 2813 | 4666  | 677-2260 | 2261-4666  | No  |
| EPB41L4A | NM_022140.3  | 46 | 20  | 65  | 2617 | 2572 | 4707  | 275-2335 | 2336-4707  | Yes |
| EPHA10   | NM_173641.2  | 49 | 28  | 76  | 1376 | 1328 | 2082  | 87-974   | 975-2082   | No  |
| EPHA3    | NM_182644.2  | 30 | 22  | 51  | 2684 | 2655 | 2684  | 226-1845 | 1846-2684  | Yes |
| EPM2AIP1 | NM_014805.3  | 35 | 260 | 294 | 6562 | 6528 | 7439  | 228-2051 | 2052-7439  | Yes |
| ERCC1    | NM_001166049 | 73 | 4   | 76  | 2732 | 2660 | 3328  | 147-968  | 969-3328   | No  |
| ERCC4    | NM_005236.2  | 33 | 267 | 299 | 4589 | 4557 | 6765  | Oct-60   | 2761-6765  | Yes |
| EREG     | NM_001432.2  | 48 | 20  | 67  | 2803 | 2756 | 4628  | 167-676  | 677-4628   | No  |
| ERN1     | XM_005257141 | 35 | 256 | 290 | 6017 | 5983 | 7980  | 393-3134 | 3135-7980  | No  |
| ERO1L    | NM_014584.1  | 31 | 21  | 51  | 2931 | 2901 | 3334  | 227-1633 | 1634-3334  | Yes |
| EVC      | NM_153717.2  | 46 | 22  | 67  | 5470 | 5425 | 6430  | 185-3163 | 3164-6430  | No  |
| EVI5     | NM_005665.4  | 40 | 40  | 79  | 4507 | 4468 | 7403  | Nov-43   | 2444-7403  | Yes |
| EXD1     | NM_001286441 | 67 | 1   | 67  | 2838 | 2772 | 3264  | 333-2051 | 2052-3264  | No  |
| EXOC8    | NM_175876.3  | 31 | 269 | 299 | 2789 | 2759 | 5099  | 88-2265  | 2266-5099  | Yes |
| EXOG     | NM_001145464 | 61 | 18  | 78  | 1293 | 1233 | 2996  | 97-1053  | 1054-2996  | Yes |
| EXOSC6   | NM_058219.2  | 59 | 18  | 76  | 1391 | 1333 | 1729  | 31-849   | 850-1729   | No  |
| EXPH5    | NM_015065.2  | 43 | 256 | 298 | 7154 | 7112 | 10208 | 112-6081 | 6082-10208 | Yes |
| EYA3     | NM_001282561 | 48 | 20  | 67  | 4765 | 4718 | 5903  | 183-1766 | 1767-5903  | Yes |
| F11R     | NM_016946.4  | 40 | 28  | 67  | 3394 | 3355 | 4830  | 271-1170 | 1171-4830  | Yes |
| F2RL2    | NM_001256566 | 40 | 40  | 79  | 1557 | 1518 | 3295  | 120-1178 | 1179-3295  | No  |
| F3       | NM_001178096 | 40 | 259 | 298 | 1375 | 1336 | 2233  | 222-938  | 939-2233   | Yes |
| FABP2    | NM_000134.3  | 54 | 25  | 78  | 908  | 855  | 2271  | 60-458   | 459-2271   | No  |
| FABP7    | XM_005266858 | 48 | 21  | 68  | 1284 | 1237 | 3473  | 246-746  | 747-3473   | No  |
| FAM101B  | NM_182705.2  | 48 | 21  | 68  | 2954 | 2907 | 3895  | 65-709   | 710-3895   | Yes |
| FAM105A  | NM_019018.2  | 47 | 21  | 67  | 3936 | 3890 | 7064  | 114-1184 | 1185-7064  | Yes |
| FAM105B  | NM_138348.4  | 37 | 21  | 57  | 5483 | 5447 | 7896  | 153-1211 | 1212-7896  | Yes |
| FAM114A1 | NM_138389.2  | 56 | 21  | 76  | 2606 | 2551 | 4138  | 260-1951 | 1952-4138  | Yes |
| FAM117B  | NM_173511.3  | 48 | 10  | 57  | 3331 | 3284 | 5795  | 11-1780  | 1781-5795  | Yes |
| FAM118A  | NM_001104595 | 55 | 20  | 74  | 2232 | 2178 | 3255  | 617-1690 | 1691-3255  | No  |
| FAM124A  | NM_001242312 | 56 | 21  | 76  | 3738 | 3683 | 4808  | 169-1809 | 1810-4808  | No  |
| FAM126B  | NM_173822.3  | 42 | 10  | 51  | 5337 | 5296 | 9348  | 189-1781 | 1782-9348  | Yes |
| FAM129A  | NM_052966.3  | 34 | 257 | 290 | 4480 | 4447 | 6969  | 231-3017 | 3018-6969  | Yes |
| FAM134A  | NM_024293.4  | 37 | 21  | 57  | 4109 | 4073 | 4625  | 137-1768 | 1769-4625  | Yes |
| FAM134C  | NM_178126.3  | 35 | 256 | 290 | 2327 | 2293 | 3818  | 104-1504 | 1505-3818  | Yes |

|          |              |    |     |     |       |       |       |          |             |     |
|----------|--------------|----|-----|-----|-------|-------|-------|----------|-------------|-----|
| FAM154B  | NM_001008226 | 46 | 23  | 68  | 2010  | 1965  | 3146  | 70-1266  | 1267-3146   | No  |
| FAM160A1 | XM_005263199 | 67 | 10  | 76  | 5948  | 5882  | 11322 | 451-3573 | 3574-11322  | Yes |
| FAM208A  | NM_001112736 | 53 | 5   | 57  | 7406  | 7354  | 8296  | 102-4640 | 4641-8296   | No  |
| FAM20B   | NM_014864.3  | 48 | 20  | 67  | 2839  | 2792  | 5950  | 294-1523 | 1524-5950   | Yes |
| FAM210A  | NM_001098801 | 32 | 20  | 51  | 2595  | 2564  | 4392  | 433-1251 | 1252-4392   | No  |
| FAM227A  | NM_001013647 | 55 | 21  | 75  | 3800  | 3746  | 10322 | 605-2317 | 2318-10322  | No  |
| FAM60A   | NM_001135811 | 39 | 29  | 67  | 1200  | 1162  | 3134  | 327-992  | 993-3134    | Yes |
| FAM73A   | NM_001270384 | 42 | 258 | 299 | 3936  | 3895  | 6427  | 33-1934  | 1935-6427   | Yes |
| FAM83B   | NM_001010872 | 35 | 256 | 290 | 4108  | 4074  | 6269  | 117-3152 | 3153-6269   | Yes |
| FAM83H   | NM_198488.3  | 33 | 267 | 299 | 4132  | 4100  | 5604  | 70-3609  | 3610-5604   | Yes |
| FANCD2   | NM_001018115 | 50 | 18  | 67  | 4704  | 4655  | 5134  | 79-4434  | 4435-5134   | Yes |
| FANCE    | NM_021922.2  | 32 | 18  | 49  | 2162  | 2131  | 2565  | 186-1796 | 1797-2565   | Yes |
| FANCF    | NM_022725.3  | 34 | 257 | 290 | 1893  | 1860  | 3309  | 32-1156  | 1157-3309   | Yes |
| FASTKD2  | NM_001136193 | 56 | 21  | 76  | 6118  | 6063  | 6930  | 411-2543 | 2544-6930   | Yes |
| FAT3     | NM_001008781 | 37 | 40  | 76  | 15114 | 15078 | 19048 | 18-13691 | 13692-19048 | Yes |
| FBXL18   | NM_024963.4  | 50 | 18  | 67  | 6453  | 6404  | 8253  | 95-2251  | 2252-8253   | Yes |
| FBXL20   | NM_001184906 | 38 | 30  | 67  | 7204  | 7167  | 10285 | 255-1469 | 1470-10285  | Yes |
| FBXO40   | NM_016298.3  | 49 | 28  | 76  | 3743  | 3695  | 5722  | 211-2340 | 2341-5722   | No  |
| FBXO44   | NM_001014765 | 33 | 20  | 52  | 3094  | 3062  | 3320  | 499-1266 | 1267-3320   | No  |
| FBXO45   | NM_001105573 | 33 | 267 | 299 | 4821  | 4789  | 5743  | 132-992  | 993-5743    | Yes |
| FBXW2    | NM_012164.3  | 54 | 23  | 76  | 3946  | 3893  | 9186  | 239-1603 | 1604-9186   | Yes |
| FBXW8    | NM_012174.1  | 48 | 20  | 67  | 3263  | 3216  | 4673  | 83-1681  | 1682-4673   | Yes |
| FCAR     | NM_002000.2  | 35 | 18  | 52  | 1298  | 1264  | 1671  | 198-1061 | 1062-1671   | No  |
| FCF1     | NM_015962.4  | 43 | 25  | 67  | 1759  | 1717  | 2409  | 52-648   | 649-2409    | Yes |
| FCGR2A   | NM_001136219 | 47 | 19  | 65  | 1613  | 1568  | 2429  | 54-1007  | 1008-2429   | No  |
| FCN1     | XM_005263399 | 32 | 18  | 49  | 3442  | 3411  | 4520  | 133-1215 | 1216-4520   | No  |
| FCRL1    | NM_001159397 | 51 | 18  | 68  | 2149  | 2099  | 2989  | 114-1214 | 1215-2989   | No  |
| FDX1     | NM_004109.4  | 36 | 17  | 52  | 2331  | 2296  | 3155  | 185-739  | 740-3155    | Yes |
| FDXACB1  | NM_138378.2  | 43 | 256 | 298 | 2404  | 2362  | 3081  | 326-2200 | 2201-3081   | Yes |
| FECH     | NM_000140.3  | 40 | 40  | 79  | 4092  | 4053  | 7277  | 118-1389 | 1390-7277   | Yes |
| FEZ1     | NM_022549.3  | 47 | 21  | 67  | 1459  | 1413  | 1836  | 236-550  | 551-1836    | No  |
| FFAR4    | NM_001195755 | 49 | 20  | 68  | 2363  | 2315  | 3609  | 57-1142  | 1143-3609   | No  |
| FGD2     | NM_173558.3  | 34 | 28  | 61  | 2721  | 2688  | 3045  | 172-2139 | 2140-3045   | No  |
| FGD6     | NM_018351.3  | 54 | 21  | 74  | 7958  | 7905  | 9288  | 225-4517 | 4518-9288   | Yes |
| FGF5     | NM_004464.3  | 36 | 22  | 57  | 3508  | 3473  | 5399  | 238-1044 | 1045-5399   | Yes |
| FGFBP3   | NM_152429.4  | 32 | 21  | 52  | 1933  | 1902  | 2564  | 183-959  | 960-2564    | Yes |
| FHDC1    | NM_033393.2  | 47 | 20  | 66  | 4371  | 4325  | 6480  | 76-3507  | 3508-6480   | No  |
| FKBP5    | NM_001145777 | 60 | 20  | 79  | 4981  | 4922  | 7384  | 159-965  | 966-7384    | Yes |
| FKBP9    | NM_001284341 | 67 | 1   | 67  | 2972  | 2906  | 3639  | 171-2042 | 2043-3639   | Yes |
| FLCN     | NM_144997.5  | 56 | 21  | 76  | 3239  | 3184  | 3723  | 505-2244 | 2245-3723   | Yes |
| FOPNL    | NM_144600.2  | 49 | 28  | 76  | 881   | 833   | 2250  | 6-530    | 531-2250    | No  |

|         |              |    |     |     |       |       |       |          |            |     |
|---------|--------------|----|-----|-----|-------|-------|-------|----------|------------|-----|
| FOXJ3   | NM_00119885C | 40 | 28  | 67  | 3182  | 3143  | 5324  | 270-2138 | 2139-5324  | Yes |
| FOXK1   | NM_001037165 | 57 | 1   | 57  | 9351  | 9295  | 11191 | Nov-12   | 2213-11191 | Yes |
| FOXP4   | NM_001012426 | 48 | 20  | 67  | 5182  | 5135  | 5965  | 459-2501 | 2502-5965  | Yes |
| FREM2   | NM_207361.4  | 47 | 21  | 67  | 15573 | 15527 | 16179 | 310-9819 | 9820-16179 | Yes |
| FRG2    | NM_001005217 | 34 | 19  | 52  | 1397  | 1364  | 2084  | 54-890   | 891-2084   | No  |
| FRG2C   | NM_001124759 | 34 | 38  | 71  | 1486  | 1453  | 2069  | 45-893   | 894-2069   | No  |
| FRMD8   | NM_031904.3  | 43 | 256 | 298 | 3285  | 3243  | 3774  | 193-1587 | 1588-3774  | No  |
| FSBP    | NM_001256141 | 48 | 20  | 67  | 2931  | 2884  | 5418  | 85-984   | 985-5418   | No  |
| FTO     | NM_001080432 | 54 | 4   | 57  | 3793  | 3740  | 4313  | 223-1740 | 1741-4313  | Yes |
| FUS     | NM_001170634 | 48 | 21  | 68  | 4021  | 3974  | 5116  | 106-1683 | 1684-5116  | Yes |
| FUT1    | NM_000148.3  | 43 | 256 | 298 | 3009  | 2967  | 4246  | 976-2073 | 2074-4246  | No  |
| FUT2    | NM_000511.5  | 64 | 4   | 67  | 2436  | 2373  | 3099  | 122-1153 | 1154-3099  | No  |
| FUT4    | NM_002033.3  | 48 | 20  | 67  | 4537  | 4490  | 6063  | 284-1876 | 1877-6063  | Yes |
| FUT9    | NM_006581.3  | 34 | 257 | 290 | 3708  | 3675  | 12815 | 342-1421 | 1422-12815 | No  |
| FXN     | NM_000144.4  | 33 | 267 | 299 | 4011  | 3979  | 7168  | 221-853  | 854-7168   | Yes |
| FZD2    | NM_001466.3  | 42 | 257 | 298 | 3341  | 3300  | 3834  | 246-1943 | 1944-3834  | No  |
| FZD3    | NM_017412.3  | 48 | 32  | 79  | 6633  | 6586  | 13804 | 530-2530 | 2531-13804 | Yes |
| FZD4    | NM_012193.3  | 56 | 21  | 76  | 5992  | 5937  | 7394  | 314-1927 | 1928-7394  | Yes |
| G6PC    | NM_000151.3  | 40 | 40  | 79  | 3922  | 3883  | 4169  | 81-1154  | 1155-4169  | No  |
| GAL3ST4 | NM_024637.4  | 46 | 22  | 67  | 2187  | 2142  | 2561  | 394-1854 | 1855-2561  | No  |
| GAPVD1  | NM_001282679 | 33 | 20  | 52  | 6444  | 6412  | 7083  | 365-4801 | 4802-7083  | Yes |
| GART    | NM_175085.2  | 35 | 18  | 52  | 1780  | 1746  | 2207  | 136-1437 | 1438-2207  | Yes |
| GATC    | NM_176818.2  | 56 | 23  | 78  | 1732  | 1677  | 4248  | 44-454   | 455-4248   | No  |
| GBP6    | NM_198460.2  | 33 | 267 | 299 | 2455  | 2423  | 4867  | 275-2176 | 2177-4867  | No  |
| GCFC2   | NM_001201334 | 64 | 10  | 73  | 3187  | 3124  | 4223  | 406-2244 | 2245-4223  | No  |
| GCM1    | NM_003643.3  | 45 | 5   | 49  | 1839  | 1795  | 2780  | 210-1520 | 1521-2780  | Yes |
| GCOM1   | NM_00101809C | 43 | 256 | 298 | 2498  | 2456  | 4662  | 132-1784 | 1785-4662  | No  |
| GDAP2   | NM_017686.3  | 37 | 21  | 57  | 4786  | 4750  | 8885  | 300-1793 | 1794-8885  | Yes |
| GDPD1   | NM_182569.3  | 37 | 21  | 57  | 2300  | 2264  | 3296  | 144-1088 | 1089-3296  | Yes |
| GEMIN6  | XM_005264568 | 32 | 21  | 52  | 812   | 781   | 981   | 31-417   | 418-981    | Yes |
| GFOD2   | NM_00124365C | 47 | 21  | 67  | 1441  | 1395  | 5309  | 296-634  | 635-5309   | Yes |
| GFPT1   | NM_00124471C | 43 | 10  | 52  | 7821  | 7779  | 8703  | 184-2283 | 2284-8703  | Yes |
| GFRAL   | NM_207410.2  | 50 | 4   | 52  | 1556  | 1507  | 1911  | 87-1271  | 1272-1911  | No  |
| GGA2    | NM_015044.4  | 43 | 21  | 63  | 5674  | 5632  | 5973  | 84-1925  | 1926-5973  | Yes |
| GGCX    | NM_000821.5  | 31 | 18  | 48  | 5736  | 5706  | 7475  | 107-2383 | 2384-7475  | No  |
| GHR     | NM_000163.4  | 43 | 10  | 52  | 3764  | 3722  | 4563  | 193-2109 | 2110-4563  | No  |
| GIGYF2  | NM_001103146 | 54 | 21  | 74  | 6646  | 6593  | 7819  | 198-4097 | 4098-7819  | Yes |
| GINS1   | NM_021067.3  | 33 | 18  | 50  | 1920  | 1888  | 3289  | 135-725  | 726-3289   | Yes |
| GINS4   | NM_032336.2  | 47 | 30  | 76  | 2635  | 2589  | 3841  | 211-882  | 883-3841   | Yes |
| GJC1    | NM_001080383 | 59 | 18  | 76  | 4933  | 4875  | 7640  | 271-1461 | 1462-7640  | Yes |
| GK5     | NM_001039547 | 49 | 28  | 76  | 4487  | 4439  | 9855  | 153-1742 | 1743-9855  | Yes |

|          |              |    |     |     |      |      |      |           |           |     |
|----------|--------------|----|-----|-----|------|------|------|-----------|-----------|-----|
| GLB1L3   | NM_001080407 | 53 | 5   | 57  | 2494 | 2442 | 2959 | 361-2322  | 2323-2959 | Yes |
| GLG1     | NM_001145666 | 48 | 10  | 57  | 7070 | 7023 | 8267 | 51-3629   | 3630-8267 | Yes |
| GLRX3    | NM_001199868 | 40 | 256 | 295 | 1122 | 1083 | 1365 | 47-1054   | 1055-1365 | Yes |
| GM2A     | NM_000405.4  | 57 | 20  | 76  | 1596 | 1540 | 3690 | 166-747   | 748-3690  | Yes |
| GNAI3    | NM_006496.3  | 43 | 256 | 298 | 3613 | 3571 | 4748 | 158-1222  | 1223-4748 | Yes |
| GNAL     | NM_001142339 | 40 | 40  | 79  | 4298 | 4259 | 6048 | 338-1483  | 1484-6048 | Yes |
| GNB4     | NM_021629.3  | 38 | 40  | 77  | 4243 | 4206 | 6428 | 281-1303  | 1304-6428 | Yes |
| GNE      | NM_001128227 | 50 | 18  | 67  | 4542 | 4493 | 5313 | 113-2374  | 2375-5313 | Yes |
| GNG4     | NM_001098721 | 40 | 28  | 67  | 1982 | 1943 | 4997 | 329-556   | 557-4997  | Yes |
| GNG7     | NM_052847.2  | 48 | 20  | 67  | 1396 | 1349 | 4264 | 238-444   | 445-4264  | No  |
| GNL3L    | NM_001184819 | 67 | 10  | 76  | 8331 | 8265 | 8690 | 257-2005  | 2006-8690 | Yes |
| GNPNAT1  | NM_198066.3  | 56 | 23  | 78  | 3487 | 3433 | 3945 | 256-810   | 811-3945  | Yes |
| GNPTAB   | NM_024312.4  | 30 | 21  | 50  | 5218 | 5189 | 5644 | 193-3963  | 3964-5644 | Yes |
| GNS      | NM_002076.3  | 73 | 4   | 76  | 3195 | 3123 | 5144 | 171-1829  | 1830-5144 | Yes |
| GOLGA3   | NM_005895.3  | 47 | 21  | 67  | 8054 | 8008 | 9252 | 560-5056  | 5057-9252 | Yes |
| GOLGA6L6 | NM_001145004 | 44 | 33  | 76  | 3541 | 3498 | 4091 | 92-2344   | 2345-4091 | No  |
| GOLPH3L  | NM_018178.5  | 52 | 10  | 61  | 2039 | 1988 | 3208 | 218-1075  | 1076-3208 | Yes |
| GOSR2    | XM_005257844 | 35 | 256 | 290 | 3439 | 3405 | 3825 | 68-565    | 566-3825  | Yes |
| GP5      | NM_004488.2  | 34 | 257 | 290 | 2315 | 2282 | 3493 | 32-1714   | 1715-3493 | No  |
| GPANK1   | NM_001199237 | 64 | 4   | 67  | 2465 | 2402 | 2793 | 686-1756  | 1757-2793 | No  |
| GPI      | NM_000175.3  | 34 | 257 | 290 | 2565 | 2532 | 4212 | 141-1817  | 1818-4212 | Yes |
| GPLD1    | NM_001503.3  | 47 | 21  | 67  | 3946 | 3900 | 5858 | 112-2634  | 2635-5858 | Yes |
| GPR110   | NM_025048.2  | 35 | 18  | 52  | 941  | 907  | 1437 | 200-856   | 857-1437  | No  |
| GPR132   | NM_001278694 | 58 | 21  | 78  | 3605 | 3548 | 3878 | 1123-2265 | 2266-3878 | No  |
| GPR37L1  | NM_004767.3  | 56 | 21  | 76  | 2105 | 2050 | 2459 | 64-1509   | 1510-2459 | No  |
| GPR4     | NM_005282.2  | 40 | 40  | 79  | 2516 | 2477 | 3057 | 946-2034  | 2035-3057 | No  |
| GPR63    | NM_001143957 | 34 | 257 | 290 | 3021 | 2988 | 6088 | 479-1738  | 1739-6088 | Yes |
| GPR65    | NM_003608.3  | 33 | 267 | 299 | 2973 | 2941 | 4522 | 559-1572  | 1573-4522 | No  |
| GPR78    | NM_080819.4  | 42 | 257 | 298 | 3148 | 3107 | 4262 | 494-1585  | 1586-4262 | No  |
| GPR83    | NM_016540.3  | 37 | 21  | 57  | 2348 | 2312 | 4300 | 173-1444  | 1445-4300 | Yes |
| GREB1    | NM_014668.3  | 57 | 1   | 57  | 7345 | 7289 | 8482 | 301-6150  | 6151-8482 | No  |
| GRM6     | NM_000843.3  | 45 | 30  | 74  | 5345 | 5301 | 6143 | 180-2813  | 2814-6143 | No  |
| GRPEL2   | NM_152407.3  | 33 | 20  | 52  | 1933 | 1901 | 4105 | 127-804   | 805-4105  | Yes |
| GRSF1    | NM_001098477 | 56 | 21  | 76  | 6025 | 5970 | 6482 | 406-1362  | 1363-6482 | Yes |
| GRWD1    | NM_031485.3  | 41 | 10  | 50  | 2041 | 2001 | 2456 | 234-1574  | 1575-2456 | No  |
| GSDMA    | NM_178171.4  | 57 | 11  | 67  | 1843 | 1787 | 2164 | 119-1456  | 1457-2164 | No  |
| GSPT1    | NM_001130006 | 32 | 21  | 52  | 3836 | 3805 | 7166 | 249-2159  | 2160-7166 | Yes |
| GSR      | NM_000637.3  | 67 | 10  | 76  | 2211 | 2145 | 3174 | 135-1703  | 1704-3174 | Yes |
| GSTCD    | NM_001031720 | 57 | 1   | 57  | 3216 | 3160 | 4122 | 73-1974   | 1975-4122 | Yes |
| GTF2E1   | NM_005513.2  | 56 | 21  | 76  | 1823 | 1768 | 3033 | 115-1434  | 1435-3033 | Yes |
| GTF2H3   | NM_001271866 | 49 | 28  | 76  | 2565 | 2517 | 3305 | 122-919   | 920-3305  | Yes |

|           |              |    |     |     |       |       |       |          |            |     |
|-----------|--------------|----|-----|-----|-------|-------|-------|----------|------------|-----|
| GTF2IRD2  | NM_173537.3  | 67 | 10  | 76  | 3302  | 3236  | 3599  | 216-3065 | 3066-3599  | No  |
| GTF2IRD2B | NM_001003795 | 76 | 1   | 76  | 3312  | 3237  | 3595  | 216-3065 | 3066-3595  | No  |
| GTPBP1    | NM_004286.4  | 49 | 4   | 52  | 4316  | 4268  | 5074  | 155-2164 | 2165-5074  | No  |
| GTPBP10   | NM_001042717 | 38 | 23  | 60  | 5779  | 5742  | 7313  | 78-1004  | 1005-7313  | Yes |
| GTPBP3    | NM_001128855 | 34 | 257 | 290 | 2135  | 2102  | 2549  | 96-1511  | 1512-2549  | Yes |
| GUCD1     | NM_001284251 | 76 | 1   | 76  | 2523  | 2449  | 3592  | 111-1001 | 1002-3592  | No  |
| H2AFV     | NM_138635.3  | 55 | 10  | 64  | 1180  | 1126  | 3755  | 156-500  | 501-3755   | Yes |
| H6PD      | NM_001282587 | 33 | 267 | 299 | 4727  | 4695  | 9043  | 153-2561 | 2562-9043  | Yes |
| HAUS2     | NM_001130447 | 39 | 41  | 79  | 3424  | 3386  | 3860  | 61-675   | 676-3860   | Yes |
| HAUS3     | NM_024511.5  | 48 | 20  | 67  | 2497  | 2450  | 5620  | 231-2042 | 2043-5620  | Yes |
| HAUS5     | NM_015302.1  | 49 | 4   | 52  | 3225  | 3177  | 4309  | 52-1953  | 1954-4309  | Yes |
| HAVCR2    | NM_032782.4  | 67 | 10  | 76  | 1751  | 1685  | 2448  | 255-1160 | 1161-2448  | No  |
| HCAR1     | NM_032554.3  | 40 | 28  | 67  | 1735  | 1696  | 2977  | 244-1284 | 1285-2977  | No  |
| HDAC2     | NM_001527.3  | 33 | 267 | 299 | 5162  | 5130  | 6656  | 288-1754 | 1755-6656  | Yes |
| HECA      | NM_016217.2  | 76 | 1   | 76  | 3550  | 3475  | 5621  | 286-1917 | 1918-5621  | Yes |
| HELZ      | NM_014877.3  | 64 | 4   | 67  | 12075 | 12012 | 13847 | 188-6016 | 6017-13847 | Yes |
| HERC4     | NM_001278187 | 43 | 25  | 67  | 1217  | 1175  | 2147  | 312-644  | 645-2147   | Yes |
| HIF3A     | NM_022462.4  | 33 | 267 | 299 | 4805  | 4773  | 5803  | 175-1977 | 1978-5803  | No  |
| HIGD1A    | NM_001099668 | 34 | 19  | 52  | 1898  | 1865  | 2952  | 252-575  | 576-2952   | Yes |
| HIST1H2BN | XM_005249438 | 57 | 1   | 57  | 2054  | 1998  | 2223  | 102-602  | 603-2223   | Yes |
| HIST1H3E  | XM_005249443 | 67 | 1   | 67  | 1761  | 1695  | 2684  | 361-771  | 772-2684   | No  |
| HIST4H4   | XM_005253301 | 63 | 5   | 67  | 609   | 547   | 1946  | 76-387   | 388-1946   | Yes |
| HJURP     | NM_001282962 | 63 | 5   | 67  | 2584  | 2522  | 3027  | 67-2151  | 2152-3027  | Yes |
| HLA-DOA   | NM_002119.3  | 47 | 21  | 67  | 2301  | 2255  | 3485  | 77-829   | 830-3485   | No  |
| HMG20A    | NM_018200.2  | 45 | 247 | 291 | 2476  | 2432  | 3898  | 202-1245 | 1246-3898  | Yes |
| HMHA1     | NM_001258328 | 41 | 4   | 44  | 4869  | 4829  | 5399  | 104-3562 | 3563-5399  | No  |
| HOGA1     | NM_00113467C | 57 | 20  | 76  | 1339  | 1283  | 2012  | 360-854  | 855-2012   | No  |
| HOMEZ     | NM_020834.2  | 57 | 1   | 57  | 2616  | 2560  | 3741  | 149-1801 | 1802-3741  | Yes |
| HOOK3     | NM_032410.3  | 59 | 4   | 61  | 5865  | 5808  | 14460 | 243-2399 | 2400-14460 | Yes |
| HP1BP3    | NM_016287.3  | 56 | 21  | 76  | 2656  | 2601  | 3938  | 141-1802 | 1803-3938  | Yes |
| HPSE      | NM_00109854C | 38 | 42  | 79  | 2260  | 2223  | 4630  | 100-1731 | 1732-4630  | Yes |
| HRH4      | NM_001143828 | 46 | 4   | 49  | 3056  | 3011  | 3422  | 101-1009 | 1010-3422  | Yes |
| HSD17B13  | NM_00113623C | 57 | 1   | 57  | 1915  | 1859  | 2289  | 66-860   | 861-2289   | No  |
| HSD3B7    | NM_001142777 | 42 | 257 | 298 | 1455  | 1414  | 2233  | 300-890  | 891-2233   | No  |
| HSPA14    | NM_001278205 | 31 | 21  | 51  | 2799  | 2769  | 4110  | 244-675  | 676-4110   | Yes |
| HTR1D     | NM_000864.4  | 30 | 23  | 52  | 2014  | 1985  | 2857  | 511-1644 | 1645-2857  | Yes |
| HUNK      | NM_014586.1  | 43 | 256 | 298 | 5468  | 5426  | 7385  | 361-2505 | 2506-7385  | Yes |
| HUS1      | NM_004507.3  | 37 | 24  | 60  | 2050  | 2014  | 3033  | 107-949  | 950-3033   | Yes |
| IBA57     | NM_001010867 | 37 | 21  | 57  | 6437  | 6401  | 7921  | 90-1160  | 1161-7921  | No  |
| ICAM1     | NM_000201.2  | 42 | 27  | 68  | 3129  | 3088  | 3249  | 320-1918 | 1919-3249  | No  |
| ICK       | NM_014920.3  | 44 | 4   | 47  | 3831  | 3788  | 6127  | 380-2278 | 2279-6127  | Yes |

|          |               |    |     |     |      |      |      |          |           |     |
|----------|---------------|----|-----|-----|------|------|------|----------|-----------|-----|
| ICMT     | NM_012405.3   | 48 | 20  | 67  | 3712 | 3665 | 4815 | 74-928   | 929-4815  | Yes |
| IFI6     | NM_002038.3   | 52 | 247 | 298 | 659  | 608  | 836  | 124-516  | 517-836   | Yes |
| IFLTD1   | NM_001145727  | 40 | 10  | 49  | 1145 | 1106 | 2504 | 12-989   | 990-2504  | No  |
| IFNLR1   | NM_170743.3   | 33 | 267 | 299 | 4015 | 3983 | 4563 | 28-1590  | 1591-4563 | No  |
| IGF1     | NM_000618.3   | 43 | 10  | 52  | 6257 | 6215 | 7321 | 220-681  | 682-7321  | No  |
| IGFBPL1  | NM_001007563  | 43 | 256 | 298 | 1702 | 1660 | 3559 | 24-860   | 861-3559  | No  |
| IKBKB    | XM_005273490  | 40 | 40  | 79  | 3622 | 3583 | 4084 | 187-2604 | 2605-4084 | Yes |
| IKZF3    | NM_001257408  | 41 | 20  | 60  | 7991 | 7951 | 9584 | 63-1490  | 1491-9584 | Yes |
| IL11     | NM_000641.3   | 40 | 28  | 67  | 1529 | 1490 | 2381 | 154-753  | 754-2381  | Yes |
| IL12RB1  | NM_153701.1   | 58 | 22  | 79  | 1599 | 1542 | 1881 | 65-1210  | 1211-1881 | No  |
| IL17RD   | NM_017563.3   | 35 | 256 | 290 | 6156 | 6122 | 8736 | 90-2309  | 2310-8736 | No  |
| IL5RA    | NM_000564.4   | 55 | 21  | 75  | 3683 | 3629 | 5821 | 645-1907 | 1908-5821 | No  |
| IL6R     | NM_001206866  | 57 | 1   | 57  | 1829 | 1773 | 2058 | 438-1496 | 1497-2058 | Yes |
| ILDR2    | NM_199351.2   | 47 | 22  | 68  | 7341 | 7295 | 8127 | 57-1976  | 1977-8127 | Yes |
| IMPAD1   | NM_017813.4   | 49 | 19  | 67  | 3447 | 3399 | 7242 | 287-1366 | 1367-7242 | Yes |
| IMPG2    | NM_016247.3   | 30 | 261 | 290 | 6791 | 6762 | 8365 | 204-3929 | 3930-8365 | Yes |
| INADL    | NM_176877.2   | 43 | 256 | 298 | 5984 | 5942 | 8505 | 115-5520 | 5521-8505 | Yes |
| ING5     | NM_032329.4   | 43 | 256 | 298 | 2572 | 2530 | 5233 | 26-748   | 749-5233  | Yes |
| INHBE    | NM_031479.3   | 57 | 20  | 76  | 2024 | 1968 | 2453 | 225-1277 | 1278-2453 | Yes |
| INMT     | NM_001199219  | 43 | 256 | 298 | 1422 | 1380 | 2576 | 17-805   | 806-2576  | Yes |
| INO80C   | XM_005258195  | 67 | 10  | 76  | 2322 | 2256 | 3458 | 273-866  | 867-3458  | Yes |
| INPP5B   | NM_005540.2   | 59 | 18  | 76  | 3244 | 3186 | 4469 | 95-2836  | 2837-4469 | Yes |
| INTS2    | NM_020748.2   | 43 | 10  | 52  | 5028 | 4986 | 5881 | 77-3691  | 3692-5881 | Yes |
| IPCEF1   | NM_001130699  | 35 | 256 | 290 | 5603 | 5569 | 6858 | 197-1513 | 1514-6858 | Yes |
| IRAK1BP1 | NM_001010844  | 46 | 20  | 65  | 2204 | 2159 | 3464 | 34-816   | 817-3464  | Yes |
| IRAK2    | NM_001570.3   | 42 | 26  | 67  | 2899 | 2858 | 3469 | 77-1954  | 1955-3469 | Yes |
| IRAK3    | NM_001142523  | 59 | 1   | 57  | 2868 | 2810 | 8168 | 103-1710 | 1711-8168 | Yes |
| IRAK4    | NM_001114182  | 43 | 256 | 298 | 3398 | 3356 | 4351 | 131-1513 | 1514-4351 | Yes |
| IREB2    | NM_004136.2   | 54 | 4   | 57  | 4924 | 4871 | 6367 | 163-3054 | 3055-6367 | Yes |
| IRF4     | NM_001195286  | 38 | 258 | 295 | 1578 | 1541 | 5329 | 127-1479 | 1480-5329 | No  |
| IRF6     | NM_001206696  | 55 | 22  | 76  | 2786 | 2732 | 4256 | 341-1459 | 1460-4256 | Yes |
| IRGQ     | NM_001007561  | 43 | 257 | 299 | 4519 | 4477 | 9703 | 157-2028 | 2029-9703 | Yes |
| ISCA1    | XM_005252249  | 48 | 21  | 68  | 1251 | 1204 | 1401 | 163-564  | 565-1401  | Yes |
| ISLR2    | NM_001130136  | 58 | 10  | 67  | 3671 | 3614 | 4833 | 770-3007 | 3008-4833 | No  |
| ISPD     | NM_0011101417 | 34 | 18  | 51  | 2307 | 2274 | 5374 | 1-1206   | 1207-5374 | No  |
| ITGA11   | XM_005254227  | 31 | 260 | 290 | 7725 | 7695 | 7936 | 98-3667  | 3668-7936 | No  |
| ITGAX    | NM_000887.4   | 43 | 256 | 298 | 4012 | 3970 | 4720 | 122-3613 | 3614-4720 | No  |
| ITGB8    | NM_002214.2   | 39 | 19  | 57  | 4318 | 4280 | 8787 | 706-3015 | 3016-8787 | No  |
| ITPRIPL2 | NM_001034841  | 40 | 40  | 79  | 6410 | 6371 | 7722 | 531-2138 | 2139-7722 | Yes |
| JADE1    | NM_001287441  | 30 | 10  | 39  | 3740 | 3711 | 4083 | 161-1690 | 1691-4083 | No  |
| JAK3     | NM_000215.3   | 33 | 267 | 299 | 4183 | 4151 | 5449 | 101-3475 | 3476-5449 | No  |

|          |              |    |     |     |      |      |       |          |            |     |
|----------|--------------|----|-----|-----|------|------|-------|----------|------------|-----|
| JAKMIP2  | NM_001270934 | 56 | 21  | 76  | 5327 | 5272 | 9209  | 542-2941 | 2942-9209  | Yes |
| JAM2     | NM_001270407 | 43 | 256 | 298 | 2704 | 2662 | 4249  | 541-1329 | 1330-4249  | No  |
| JMJD1C   | XM_005269628 | 38 | 41  | 78  | 6556 | 6519 | 8299  | 459-5561 | 5562-8299  | Yes |
| JMY      | NM_152405.4  | 37 | 43  | 79  | 5122 | 5086 | 9145  | 550-3516 | 3517-9145  | Yes |
| JOSD1    | NM_014876.5  | 48 | 20  | 67  | 1786 | 1739 | 3435  | 468-1076 | 1077-3435  | Yes |
| JRK      | NM_003724.3  | 36 | 257 | 292 | 3473 | 3438 | 9124  | 526-2232 | 2233-9124  | Yes |
| KANSL3   | XM_005263980 | 67 | 1   | 67  | 3361 | 3295 | 4830  | 147-2903 | 2904-4830  | No  |
| KATNAL1  | NM_00101438C | 56 | 21  | 76  | 2501 | 2446 | 7512  | 130-1602 | 1603-7512  | Yes |
| KBTD12   | NM_207335.2  | 48 | 20  | 67  | 4230 | 4183 | 5268  | 4-1875   | 1876-5268  | No  |
| KCNE3    | NM_005472.4  | 32 | 21  | 52  | 1705 | 1674 | 3070  | 348-659  | 660-3070   | No  |
| KCNE4    | NM_080671.3  | 57 | 20  | 76  | 2540 | 2484 | 3190  | 216-881  | 882-3190   | No  |
| KCNJ5    | XM_005271543 | 64 | 4   | 67  | 4378 | 4315 | 5714  | 21-1280  | 1281-5714  | No  |
| KCNMB4   | NM_014505.5  | 48 | 29  | 76  | 2979 | 2932 | 4725  | 454-1086 | 1087-4725  | Yes |
| KCNN3    | NM_001204087 | 56 | 21  | 76  | 9854 | 9799 | 13080 | 315-2555 | 2556-13080 | Yes |
| KCTD10   | NM_031954.3  | 49 | 28  | 76  | 3018 | 2970 | 4057  | 89-1030  | 1031-4057  | Yes |
| KIAA0513 | NM_001286565 | 67 | 1   | 67  | 5648 | 5582 | 7781  | 632-1867 | 1868-7781  | No  |
| KIAA0754 | NM_015038.1  | 57 | 1   | 57  | 5996 | 5940 | 6979  | 763-5046 | 5047-6979  | No  |
| KIAA0825 | NM_001145678 | 48 | 21  | 68  | 5403 | 5356 | 7241  | 258-4085 | 4086-7241  | No  |
| KIAA0922 | XM_005262869 | 57 | 20  | 76  | 5302 | 5246 | 5914  | 53-4882  | 4883-5914  | Yes |
| KIAA1143 | NM_020696.3  | 52 | 1   | 52  | 4642 | 4591 | 5157  | 80-544   | 545-5157   | Yes |
| KIAA1210 | NM_020721.1  | 61 | 1   | 61  | 5475 | 5416 | 7838  | Jan-30   | 5131-7838  | No  |
| KIAA1324 | NM_001267048 | 63 | 5   | 67  | 6164 | 6102 | 6793  | 222-3002 | 3003-6793  | No  |
| KIAA1456 | NM_001099677 | 34 | 1   | 34  | 3864 | 3831 | 9313  | 581-1567 | 1568-9313  | No  |
| KIAA1462 | NM_020848.2  | 31 | 21  | 51  | 8916 | 8886 | 9300  | 138-4217 | 4218-9300  | Yes |
| KIAA1467 | NM_020853.1  | 33 | 267 | 299 | 3442 | 3410 | 4725  | 24-1892  | 1893-4725  | Yes |
| KIAA1671 | NM_001145206 | 36 | 256 | 291 | 9541 | 9506 | 10517 | 27-5447  | 5448-10517 | Yes |
| KIAA1737 | NM_033426.2  | 56 | 21  | 76  | 2890 | 2835 | 4397  | 180-1379 | 1380-4397  | Yes |
| KIAA1751 | NM_001080484 | 61 | 8   | 68  | 3378 | 3319 | 4710  | 157-2445 | 2446-4710  | No  |
| KIAA1755 | NM_001029864 | 43 | 257 | 299 | 4654 | 4612 | 6412  | 273-3875 | 3876-6412  | No  |
| KIAA1841 | XM_005264609 | 48 | 20  | 67  | 1635 | 1588 | 2474  | 351-1490 | 1491-2474  | Yes |
| KIAA2018 | NM_001009899 | 58 | 10  | 67  | 8627 | 8570 | 13708 | 412-7149 | 7150-13708 | Yes |
| KIF18B   | NM_001264573 | 34 | 257 | 290 | 3594 | 3561 | 4308  | 99-2600  | 2601-4308  | Yes |
| KIF1B    | NM_183416.3  | 56 | 21  | 76  | 6520 | 6465 | 7680  | 253-3714 | 3715-7680  | Yes |
| KIF1C    | NM_006612.5  | 54 | 1   | 54  | 4552 | 4499 | 7935  | 358-3669 | 3670-7935  | No  |
| KIF3A    | NM_007054.5  | 42 | 257 | 298 | 4548 | 4507 | 6257  | 155-2254 | 2255-6257  | Yes |
| KIN      | NM_012311.3  | 33 | 19  | 51  | 3153 | 3121 | 6401  | 95-1276  | 1277-6401  | Yes |
| KLC1     | XM_005267601 | 43 | 256 | 298 | 2728 | 2686 | 5571  | 46-2034  | 2035-5571  | No  |
| KLF8     | NM_001159296 | 33 | 267 | 299 | 3300 | 3268 | 4821  | 487-1260 | 1261-4821  | No  |
| KLHL24   | NM_017644.3  | 40 | 256 | 295 | 5819 | 5780 | 7331  | 296-2098 | 2099-7331  | Yes |
| KLHL30   | NM_198582.3  | 63 | 5   | 67  | 3307 | 3245 | 3685  | 108-1844 | 1845-3685  | No  |
| KLHL6    | NM_130446.2  | 48 | 5   | 52  | 3188 | 3141 | 6320  | 59-1924  | 1925-6320  | No  |



|              |              |    |     |     |      |      |       |           |            |     |
|--------------|--------------|----|-----|-----|------|------|-------|-----------|------------|-----|
| KLLN         | NM_001126049 | 33 | 20  | 52  | 3539 | 3507 | 4277  | 951-1487  | 1488-4277  | No  |
| KLRD1        | NM_001114396 | 51 | 18  | 68  | 1209 | 1159 | 3195  | 198-737   | 738-3195   | No  |
| KMO          | NM_003679.4  | 35 | 257 | 291 | 2479 | 2445 | 5266  | 312-1772  | 1773-5266  | No  |
| KPNA4        | NM_002268.4  | 67 | 1   | 67  | 7834 | 7768 | 8981  | 307-1872  | 1873-8981  | Yes |
| KRAS         | NM_004985.3  | 48 | 20  | 67  | 3156 | 3109 | 5312  | 182-748   | 749-5312   | Yes |
| KSR2         | NM_173598.4  | 40 | 40  | 79  | 8986 | 8947 | 17008 | 56-2821   | 2822-17008 | No  |
| L2HGDH       | NM_024884.2  | 33 | 267 | 299 | 2605 | 2573 | 6111  | 80-1471   | 1472-6111  | Yes |
| LAMP3        | NM_014398.3  | 50 | 18  | 67  | 2126 | 2077 | 3341  | 225-1475  | 1476-3341  | No  |
| LAMTOR3      | NM_001243736 | 43 | 257 | 299 | 2043 | 2001 | 4259  | 250-603   | 604-4259   | No  |
| LAT2         | XM_005250562 | 67 | 10  | 76  | 2291 | 2225 | 2499  | 192-923   | 924-2499   | No  |
| LATS1        | NM_004690.3  | 31 | 29  | 59  | 6328 | 6298 | 7533  | 549-3941  | 3942-7533  | Yes |
| LBX2         | NM_001009812 | 42 | 257 | 298 | 1253 | 1212 | 1463  | 458-1042  | 1043-1463  | No  |
| LDHAL6A      | NM_001144071 | 37 | 256 | 292 | 1460 | 1424 | 1990  | 262-1260  | 1261-1990  | No  |
| LEPREL1      | NM_001134418 | 38 | 10  | 47  | 2241 | 2204 | 3082  | 299-1882  | 1883-3082  | Yes |
| LEPROT       | NM_001198681 | 53 | 5   | 57  | 4145 | 4093 | 4625  | 115-537   | 538-4625   | Yes |
| LETM1        | NM_012318.2  | 58 | 10  | 67  | 4713 | 4656 | 5462  | 298-2517  | 2518-5462  | Yes |
| LGSN         | NM_001143940 | 30 | 28  | 57  | 3209 | 3180 | 5213  | 35-661    | 662-5213   | No  |
| LIMD1        | NM_014240.2  | 54 | 20  | 73  | 5478 | 5425 | 6284  | 50-2080   | 2081-6284  | Yes |
| LIN28A       | NM_024674.4  | 57 | 11  | 67  | 2980 | 2924 | 4014  | 115-744   | 745-4014   | No  |
| LIN54        | NM_001115007 | 38 | 261 | 298 | 2706 | 2669 | 5214  | 129-1715  | 1716-5214  | Yes |
| LIN7C        | NM_018362.3  | 34 | 257 | 290 | 3839 | 3806 | 4866  | 28-621    | 622-4866   | Yes |
| LINC00843    | XM_005278342 | 57 | 1   | 57  | 1709 | 1653 | 2439  | 356-808   | 809-2439   | No  |
| LITAF        | NM_001136472 | 42 | 38  | 79  | 1461 | 1420 | 2479  | 71-556    | 557-2479   | Yes |
| LIX1L        | NM_153713.2  | 43 | 256 | 298 | 2616 | 2574 | 3992  | 93-1106   | 1107-3992  | Yes |
| LLGL1        | NM_004140.3  | 42 | 256 | 297 | 3652 | 3611 | 4225  | 62-3256   | 3257-4225  | Yes |
| LMX1B        | NM_001174146 | 43 | 10  | 52  | 2807 | 2765 | 5816  | 8-1228    | 1229-5816  | No  |
| LNX2         | NM_153371.3  | 57 | 20  | 76  | 2988 | 2932 | 4804  | 310-2382  | 2383-4804  | Yes |
| LOC100129520 | XM_005262352 | 48 | 31  | 78  | 4116 | 4070 | 4787  | 272-3253  | 3254-4787  | No  |
| LOC100288255 | NM_001199232 | 34 | 19  | 52  | 1395 | 1362 | 2082  | 54-890    | 891-2082   | No  |
| LOC100294341 | XM_003403615 | 67 | 10  | 76  | 4451 | 4385 | 5973  | 852-1385  | 1386-5973  | No  |
| LOC100506127 | NM_001282456 | 48 | 21  | 68  | 3024 | 2977 | 5372  | 505-1269  | 1270-5372  | No  |
| LOC100506571 | XM_003119160 | 44 | 256 | 299 | 1688 | 1645 | 2649  | 204-827   | 828-2649   | No  |
| LOC100507656 | XM_003118753 | 57 | 20  | 76  | 2862 | 2806 | 3754  | 254-2281  | 2282-3754  | No  |
| LOC100652758 | NM_001278082 | 33 | 267 | 299 | 1053 | 1021 | 1175  | 262-594   | 595-1175   | No  |
| LOC100653071 | XM_003403765 | 33 | 267 | 299 | 1159 | 1127 | 1467  | 70-738    | 739-1467   | No  |
| LOC100996273 | XM_003846283 | 58 | 19  | 76  | 1793 | 1736 | 2946  | 304-945   | 946-2946   | No  |
| LOC100996779 | XM_003846740 | 40 | 40  | 79  | 1665 | 1626 | 2598  | 648-1052  | 1053-2598  | No  |
| LOC101060212 | XM_005276917 | 60 | 19  | 78  | 2766 | 2707 | 3994  | 62-943    | 944-3994   | No  |
| LOC101060405 | XM_005276503 | 32 | 21  | 52  | 1897 | 1866 | 2652  | 92-766    | 767-2652   | No  |
| LOC101060445 | XM_005276331 | 53 | 5   | 57  | 1345 | 1293 | 3483  | 479-1126  | 1127-3483  | No  |
| LOC101060589 | XM_003960630 | 49 | 28  | 76  | 4603 | 4555 | 6050  | 1324-3843 | 3844-6050  | No  |

|              |              |    |     |     |       |       |       |           |             |     |
|--------------|--------------|----|-----|-----|-------|-------|-------|-----------|-------------|-----|
| LOC101927294 | XM_005260628 | 57 | 1   | 57  | 1185  | 1129  | 1631  | 62-889    | 890-1631    | No  |
| LOC101928206 | XM_005268252 | 48 | 32  | 79  | 698   | 654   | 1015  | 1-465     | 466-1015    | No  |
| LOC101929403 | XM_005274425 | 56 | 12  | 67  | 566   | 511   | 870   | 1->870    | 1-870       | No  |
| LOC101929496 | XM_005250749 | 33 | 267 | 299 | 820   | 788   | 2815  | <1-123    | 124-2815    | No  |
| LOC101929668 | XM_005255732 | 67 | 4   | 70  | 1586  | 1520  | 2652  | 2-970     | 971-2652    | No  |
| LOC101929695 | XM_005268255 | 35 | 256 | 290 | 1771  | 1737  | 3357  | 855-1544  | 1545-3357   | No  |
| LOC101929889 | XM_005276513 | 46 | 18  | 63  | 1580  | 1535  | 1909  | 108-1310  | 1311-1909   | No  |
| LOC101929970 | XM_005276472 | 33 | 10  | 42  | 3250  | 3218  | 3528  | 562-1800  | 1801-3528   | No  |
| LOC101930037 | XM_005276305 | 39 | 40  | 78  | 1017  | 979   | 1168  | 1-618     | 619-1168    | No  |
| LOC101930123 | XM_005276497 | 49 | 28  | 76  | 3068  | 3020  | 5284  | 470-2647  | 2648-5284   | No  |
| LOC101930145 | XM_005276410 | 48 | 20  | 67  | 81    | 34    | 291   | <1->291   | 1-291       | No  |
| LOC101930184 | XM_005272731 | 43 | 10  | 52  | 89    | 47    | 204   | <1->204   | 1-204       | No  |
| LOC101930602 | XM_005276012 | 43 | 10  | 52  | 89    | 47    | 204   | <1->204   | 1-204       | No  |
| LOC400682    | XM_003846486 | 42 | 10  | 51  | 3183  | 3142  | 3499  | 365-955   | 956-3499    | No  |
| LOC440243    | NM_001271664 | 44 | 33  | 76  | 3227  | 3184  | 3777  | 92-2053   | 2054-3777   | No  |
| LOC646021    | XM_003960735 | 50 | 18  | 67  | 1240  | 1191  | 1581  | 1-1014    | 1015-1581   | No  |
| LOC651959    | XM_003846756 | 34 | 19  | 52  | 1332  | 1299  | 2029  | 1-849     | 850-2029    | No  |
| LONRF2       | NM_198461.3  | 43 | 256 | 298 | 6465  | 6423  | 13920 | 641-2905  | 2906-13920  | Yes |
| LPCAT3       | NM_005768.5  | 61 | 16  | 76  | 1890  | 1830  | 2297  | 115-1578  | 1579-2297   | Yes |
| LPGAT1       | NM_014873.2  | 47 | 18  | 64  | 2683  | 2637  | 7802  | 228-1340  | 1341-7802   | Yes |
| LPIN3        | NM_022896.1  | 48 | 20  | 67  | 3061  | 3014  | 4464  | 92-2647   | 2648-4464   | No  |
| LPP          | NM_001167671 | 43 | 256 | 298 | 7640  | 7598  | 18221 | 190-2028  | 2029-18221  | Yes |
| LRCH3        | XM_005269368 | 48 | 21  | 68  | 2848  | 2801  | 2861  | 39-2216   | 2217-2861   | Yes |
| LRP2         | NM_004525.2  | 40 | 36  | 75  | 15391 | 15352 | 15735 | 214-14181 | 14182-15735 | Yes |
| LRPAP1       | NM_002337.3  | 60 | 19  | 78  | 7037  | 6978  | 10536 | 86-1159   | 1160-10536  | No  |
| LRRRC10      | NM_201550.2  | 39 | 40  | 78  | 2036  | 1998  | 2649  | 325-1158  | 1159-2649   | No  |
| LRRRC19      | NM_022901.2  | 56 | 21  | 76  | 2334  | 2279  | 3624  | 112-1224  | 1225-3624   | No  |
| LRRRC25      | NM_145256.2  | 55 | 22  | 76  | 2134  | 2080  | 2430  | 643-1560  | 1561-2430   | No  |
| LRRRC3       | NM_030891.3  | 48 | 5   | 52  | 1972  | 1925  | 2520  | 294-1067  | 1068-2520   | No  |
| LRRRC47      | NM_020710.2  | 56 | 21  | 76  | 2018  | 1963  | 2694  | 29-1780   | 1781-2694   | No  |
| LRTOMT       | NM_001205138 | 43 | 256 | 298 | 1349  | 1307  | 2521  | 612-1136  | 1137-2521   | No  |
| LSM5         | NM_001130710 | 32 | 21  | 52  | 1728  | 1697  | 2212  | 71-259    | 260-2212    | Yes |
| LURAP1       | NM_001013615 | 39 | 40  | 78  | 1293  | 1255  | 1863  | 94-813    | 814-1863    | No  |
| LUZP2        | NM_001009909 | 33 | 267 | 299 | 3906  | 3874  | 5311  | 275-1315  | 1316-5311   | No  |
| LY75         | NM_002349.3  | 49 | 19  | 67  | 5900  | 5852  | 6936  | 75-5243   | 5244-6936   | No  |
| LY75-CD302   | NM_001198759 | 46 | 22  | 67  | 8028  | 7983  | 8919  | 75-5696   | 5697-8919   | No  |
| LYRM7        | NM_181705.2  | 38 | 245 | 282 | 3359  | 3322  | 6213  | 74-388    | 389-6213    | Yes |
| LYZ          | NM_000239.2  | 57 | 1   | 57  | 935   | 879   | 1516  | 56-502    | 503-1516    | No  |
| LZTS1        | NM_021020.2  | 43 | 256 | 298 | 3347  | 3305  | 5459  | 112-1902  | 1903-5459   | No  |
| MAGEA10      | NM_001011543 | 54 | 23  | 76  | 2246  | 2193  | 2759  | 434-1543  | 1544-2759   | No  |
| MAGT1        | NM_032121.5  | 40 | 40  | 79  | 2062  | 2023  | 4035  | 63-1166   | 1167-4035   | Yes |

|           |              |    |     |     |      |      |       |          |            |     |
|-----------|--------------|----|-----|-----|------|------|-------|----------|------------|-----|
| MAK       | NM_001242385 | 49 | 28  | 76  | 2775 | 2727 | 3800  | 304-2055 | 2056-3800  | No  |
| MALL      | NM_005434.4  | 57 | 1   | 57  | 1812 | 1756 | 3071  | 775-1236 | 1237-3071  | No  |
| MANSC1    | NM_018050.2  | 67 | 10  | 76  | 1834 | 1768 | 2297  | 259-1554 | 1555-2297  | Yes |
| MAP1LC3C  | NM_001004343 | 33 | 267 | 299 | 961  | 929  | 1192  | 76-519   | 520-1192   | No  |
| MAP3K13   | NM_001242314 | 56 | 21  | 76  | 8044 | 7989 | 9830  | 292-3192 | 3193-9830  | Yes |
| MAP4      | NM_030885.3  | 30 | 28  | 57  | 1978 | 1949 | 3224  | 527-826  | 827-3224   | Yes |
| MAP7D3    | NM_001173516 | 43 | 256 | 298 | 3254 | 3212 | 4463  | 164-2740 | 2741-4463  | Yes |
| MAPK12    | XM_003846644 | 43 | 256 | 298 | 1322 | 1280 | 2150  | 65-847   | 848-2150   | No  |
| MAPK13    | NM_002754.4  | 42 | 257 | 298 | 5885 | 5844 | 6348  | 100-1197 | 1198-6348  | No  |
| MAPK1IP1L | NM_144578.3  | 42 | 257 | 298 | 3232 | 3191 | 6469  | 165-902  | 903-6469   | Yes |
| 6-Mar     | NM_00127066C | 47 | 21  | 67  | 5025 | 4979 | 9566  | 261-2849 | 2850-9566  | No  |
| MARVELD2  | NM_001038603 | 35 | 256 | 290 | 1840 | 1806 | 2297  | 75-1751  | 1752-2297  | Yes |
| MAST3     | NM_015016.1  | 48 | 20  | 67  | 4335 | 4288 | 5893  | Jan-30   | 3931-5893  | Yes |
| MATR3     | NM_001194954 | 37 | 256 | 292 | 4703 | 4667 | 5522  | 697-3240 | 3241-5522  | Yes |
| MAVS      | NM_001206491 | 57 | 20  | 76  | 4790 | 4734 | 11596 | 421-1620 | 1621-11596 | No  |
| MBOAT1    | NM_00108048C | 57 | 1   | 57  | 2035 | 1979 | 4334  | 231-1718 | 1719-4334  | No  |
| MCCC2     | NM_022132.4  | 58 | 10  | 67  | 2551 | 2494 | 3696  | 139-1830 | 1831-3696  | Yes |
| MCF2L2    | NM_015078.3  | 57 | 1   | 57  | 4693 | 4637 | 5013  | 293-3637 | 3638-5013  | Yes |
| MCM10     | NM_018518.4  | 34 | 259 | 292 | 3554 | 3521 | 4559  | 129-2753 | 2754-4559  | Yes |
| MCPH1     | NM_024596.3  | 33 | 267 | 299 | 3015 | 2983 | 3154  | 77-2584  | 2585-3154  | Yes |
| MCTS1     | NM_001137554 | 67 | 1   | 67  | 1532 | 1466 | 9617  | 158-706  | 707-9617   | Yes |
| MCUR1     | NM_001031713 | 56 | 21  | 76  | 2745 | 2690 | 5472  | 132-1211 | 1212-5472  | No  |
| MDM2      | NM_001145337 | 42 | 257 | 298 | 6386 | 6345 | 7104  | 75-1409  | 1410-7104  | Yes |
| MDM4      | NM_001204171 | 33 | 1   | 33  | 7258 | 7226 | 9940  | 167-1489 | 1490-9940  | Yes |
| ME2       | NM_001168335 | 54 | 4   | 57  | 3364 | 3311 | 4468  | 260-1699 | 1700-4468  | Yes |
| MEAF6     | NM_001270875 | 58 | 10  | 67  | 3380 | 3323 | 4788  | 74-649   | 650-4788   | No  |
| MED17     | NM_004268.4  | 32 | 19  | 50  | 2751 | 2720 | 3497  | 276-2231 | 2232-3497  | Yes |
| MED18     | NM_00112735C | 59 | 18  | 76  | 1034 | 976  | 1813  | 190-816  | 817-1813   | No  |
| MED21     | NM_001271811 | 31 | 269 | 299 | 2378 | 2348 | 2703  | 59-265   | 266-2703   | Yes |
| MEFV      | NM_000243.2  | 67 | 1   | 67  | 3309 | 3243 | 3507  | 41-2386  | 2387-3507  | No  |
| MET       | NM_000245.2  | 33 | 267 | 299 | 5070 | 5038 | 6641  | 188-4360 | 4361-6641  | Yes |
| METTL16   | NM_024086.3  | 63 | 5   | 67  | 3359 | 3297 | 5758  | 149-1837 | 1838-5758  | No  |
| METTL20   | NM_001135863 | 40 | 28  | 67  | 1656 | 1617 | 2122  | 229-1017 | 1018-2122  | No  |
| METTL21B  | NM_015433.2  | 61 | 1   | 61  | 1383 | 1323 | 2717  | 126-806  | 807-2717   | No  |
| METTL6    | NM_152396.2  | 54 | 21  | 74  | 1626 | 1573 | 2499  | 259-1113 | 1114-2499  | Yes |
| METTL7A   | NM_014033.3  | 48 | 5   | 52  | 1616 | 1569 | 3390  | 289-1023 | 1024-3390  | Yes |
| METTL8    | NM_024770.3  | 32 | 18  | 49  | 2922 | 2891 | 8154  | 142-1365 | 1366-8154  | Yes |
| MFAP3     | NM_001135037 | 58 | 21  | 78  | 2883 | 2826 | 4588  | 197-847  | 848-4588   | Yes |
| MFSD4     | NM_181644.4  | 48 | 20  | 67  | 2898 | 2851 | 4114  | 87-1631  | 1632-4114  | No  |
| MGAT4A    | NM_012214.2  | 34 | 40  | 73  | 4576 | 4543 | 8382  | 315-1922 | 1923-8382  | Yes |
| MICB      | NM_005931.3  | 30 | 22  | 51  | 2047 | 2018 | 2497  | 117-1268 | 1269-2497  | Yes |

|          |              |    |     |     |      |      |       |          |            |     |
|----------|--------------|----|-----|-----|------|------|-------|----------|------------|-----|
| MILR1    | NM_001085423 | 47 | 21  | 67  | 1237 | 1191 | 1488  | 55-1086  | 1087-1488  | No  |
| MINOS1   | NM_001032363 | 56 | 12  | 67  | 2136 | 2081 | 3726  | 70-306   | 307-3726   | No  |
| MIP      | NM_012064.3  | 60 | 239 | 298 | 2128 | 2069 | 2608  | 39-830   | 831-2608   | No  |
| MIS12    | NM_001258217 | 55 | 21  | 75  | 1896 | 1842 | 2701  | 746-1363 | 1364-2701  | Yes |
| MLANA    | NM_005511.1  | 57 | 11  | 67  | 1114 | 1058 | 1524  | 54-410   | 411-1524   | No  |
| MMS22L   | NM_198468.2  | 57 | 1   | 57  | 6867 | 6811 | 8643  | 267-3998 | 3999-8643  | No  |
| MOAP1    | NM_022151.4  | 35 | 256 | 290 | 1726 | 1692 | 2435  | 371-1426 | 1427-2435  | No  |
| MOB1B    | NM_001244766 | 58 | 19  | 76  | 4572 | 4515 | 7091  | 295-960  | 961-7091   | No  |
| MOB3A    | NM_130807.2  | 40 | 40  | 79  | 1687 | 1648 | 3347  | 319-972  | 973-3347   | No  |
| MOC53    | NM_014484.4  | 63 | 5   | 67  | 2090 | 2028 | 3050  | 30-1412  | 1413-3050  | Yes |
| MON2     | NM_001278469 | 43 | 256 | 298 | 8062 | 8020 | 10440 | 392-5419 | 5420-10440 | Yes |
| MORN4    | NM_001098831 | 43 | 10  | 52  | 1298 | 1256 | 2352  | 183-623  | 624-2352   | Yes |
| MPC2     | NM_001143674 | 43 | 256 | 298 | 1340 | 1298 | 2220  | 189-572  | 573-2220   | No  |
| MPHOSPH8 | NM_017520.3  | 65 | 12  | 76  | 3106 | 3042 | 4281  | 102-2684 | 2685-4281  | Yes |
| MPL      | NM_005373.2  | 48 | 20  | 67  | 2606 | 2559 | 3645  | 46-1953  | 1954-3645  | No  |
| MPRIP    | NM_015134.3  | 35 | 256 | 290 | 7561 | 7527 | 10960 | 90-3206  | 3207-10960 | Yes |
| MPV17L   | NM_001128423 | 51 | 17  | 67  | 1373 | 1323 | 2309  | 145-735  | 736-2309   | No  |
| MPZL1    | NM_001146191 | 50 | 30  | 79  | 1622 | 1573 | 4576  | 203-562  | 563-4576   | Yes |
| MPZL3    | NM_001286152 | 67 | 10  | 76  | 1650 | 1584 | 3950  | 75-746   | 747-3950   | Yes |
| MREG     | NM_018000.2  | 43 | 10  | 52  | 2100 | 2058 | 3213  | 297-941  | 942-3213   | Yes |
| MRI1     | NM_001031727 | 58 | 10  | 67  | 2058 | 2001 | 3177  | 67-1176  | 1177-3177  | Yes |
| MRO      | NM_001127174 | 56 | 21  | 76  | 4194 | 4139 | 4895  | 81-671   | 672-4895   | No  |
| MRPL30   | NM_145212.3  | 43 | 257 | 299 | 2679 | 2637 | 4554  | 199-684  | 685-4554   | Yes |
| MRPL35   | NM_016622.3  | 33 | 45  | 77  | 1744 | 1712 | 3323  | 59-625   | 626-3323   | No  |
| MRPL42   | NM_014050.3  | 36 | 256 | 291 | 2808 | 2773 | 3139  | 160-588  | 589-3139   | Yes |
| MRPL44   | NM_022915.3  | 50 | 18  | 67  | 1413 | 1364 | 1772  | 70-1068  | 1069-1772  | Yes |
| MRPL49   | NM_004927.3  | 48 | 20  | 67  | 1011 | 964  | 2119  | 104-604  | 605-2119   | No  |
| MRPS16   | NM_016065.3  | 35 | 256 | 290 | 1300 | 1266 | 2651  | 212-625  | 626-2651   | Yes |
| MRTO4    | NM_016183.3  | 33 | 267 | 299 | 2124 | 2092 | 2273  | 256-975  | 976-2273   | Yes |
| MS4A10   | NM_206893.3  | 42 | 257 | 298 | 1844 | 1803 | 2296  | 97-900   | 901-2296   | No  |
| MSMO1    | NM_001017369 | 49 | 4   | 52  | 1298 | 1250 | 1955  | 238-726  | 727-1955   | No  |
| MSS51    | NM_001024593 | 56 | 21  | 76  | 1751 | 1696 | 2433  | 67-1449  | 1450-2433  | No  |
| MTDH     | NM_178812.3  | 33 | 21  | 53  | 6470 | 6438 | 7667  | 329-2077 | 2078-7667  | Yes |
| MTF1     | NM_005955.2  | 48 | 5   | 52  | 4401 | 4354 | 7986  | 142-2403 | 2404-7986  | Yes |
| MTFMT    | NM_139242.3  | 43 | 256 | 298 | 1898 | 1856 | 2763  | 27-1196  | 1197-2763  | No  |
| MTL5     | NM_001039656 | 57 | 20  | 76  | 1971 | 1915 | 3625  | 141-1061 | 1062-3625  | No  |
| MTPAP    | NM_018109.3  | 57 | 2   | 57  | 2997 | 2941 | 5620  | 64-1812  | 1813-5620  | No  |
| MTR      | NM_000254.2  | 56 | 21  | 76  | 5120 | 5065 | 10558 | 424-4221 | 4222-10558 | Yes |
| MUC21    | NM_001010909 | 54 | 22  | 75  | 3212 | 3159 | 3656  | 252-1952 | 1953-3656  | No  |
| MUSK     | XM_005251994 | 43 | 256 | 298 | 5271 | 5229 | 6008  | 251-2890 | 2891-6008  | No  |
| MXRA7    | NM_001008528 | 58 | 10  | 67  | 1605 | 1548 | 2507  | 29-643   | 644-2507   | Yes |

|        |              |    |     |     |       |       |       |          |            |     |
|--------|--------------|----|-----|-----|-------|-------|-------|----------|------------|-----|
| MYADM  | NM_001020818 | 49 | 28  | 76  | 1697  | 1649  | 3243  | 315-1283 | 1284-3243  | Yes |
| MYEF2  | NM_016132.3  | 76 | 1   | 76  | 3404  | 3329  | 5403  | 125-1927 | 1928-5403  | Yes |
| MYLK3  | NM_182493.2  | 42 | 257 | 298 | 4351  | 4310  | 7998  | 117-2576 | 2577-7998  | Yes |
| MYLK4  | NM_001012418 | 48 | 1   | 48  | 3005  | 2958  | 5760  | 298-1464 | 1465-5760  | No  |
| MYNN   | NM_001185118 | 67 | 10  | 76  | 5292  | 5226  | 5367  | 497-2329 | 2330-5367  | Yes |
| MYO10  | NM_012334.2  | 44 | 256 | 299 | 8177  | 8134  | 11436 | 469-6645 | 6646-11436 | Yes |
| MYO5C  | NM_018728.3  | 54 | 4   | 57  | 6123  | 6070  | 6975  | 163-5391 | 5392-6975  | No  |
| NAA38  | NM_016200.4  | 58 | 10  | 67  | 5365  | 5308  | 12520 | 193-483  | 484-12520  | No  |
| NAA50  | NM_025146.2  | 35 | 256 | 290 | 5303  | 5269  | 6148  | 325-834  | 835-6148   | No  |
| NADK2  | NM_001085411 | 49 | 19  | 67  | 3125  | 3077  | 3897  | 1-1329   | 1330-3897  | No  |
| NANOG  | NM_024865.2  | 40 | 256 | 295 | 1421  | 1382  | 2098  | 217-1134 | 1135-2098  | No  |
| NANP   | NM_152667.2  | 35 | 41  | 75  | 1989  | 1955  | 3806  | 65-811   | 812-3806   | Yes |
| NAPG   | NM_003826.2  | 37 | 256 | 292 | 2000  | 1964  | 3729  | 228-1166 | 1167-3729  | Yes |
| NARG2  | NM_001018089 | 59 | 18  | 76  | 3963  | 3905  | 7081  | 502-3039 | 3040-7081  | Yes |
| NAT10  | XM_005252999 | 40 | 22  | 61  | 5514  | 5475  | 6222  | 213-3290 | 3291-6222  | Yes |
| NAV1   | NM_001167738 | 35 | 256 | 290 | 10431 | 10397 | 11689 | 190-4641 | 4642-11689 | No  |
| NCCRP1 | NM_001001414 | 33 | 267 | 299 | 1617  | 1585  | 1973  | 20-847   | 848-1973   | No  |
| NCMAP  | NM_00101098C | 59 | 21  | 79  | 1801  | 1743  | 3991  | 102-410  | 411-3991   | No  |
| NDRG3  | NM_022477.3  | 50 | 18  | 67  | 2470  | 2421  | 2995  | 143-1234 | 1235-2995  | Yes |
| NDST3  | NM_004784.2  | 30 | 261 | 290 | 4507  | 4478  | 5961  | 404-3025 | 3026-5961  | Yes |
| NDUFA4 | NM_002489.3  | 41 | 21  | 61  | 1166  | 1127  | 2058  | 130-375  | 376-2058   | Yes |
| NDUFA7 | NM_005001.3  | 31 | 49  | 79  | 578   | 548   | 585   | 39-380   | 381-585    | Yes |
| NDUFC2 | NM_001204054 | 56 | 21  | 76  | 1956  | 1901  | 2284  | 476-742  | 743-2284   | No  |
| NDUFV3 | NM_001001503 | 43 | 256 | 298 | 574   | 532   | 1056  | 67-393   | 394-1056   | Yes |
| NEIL2  | NM_001135746 | 32 | 19  | 50  | 1640  | 1609  | 2202  | 132-1130 | 1131-2202  | Yes |
| NEK2   | NM_001204183 | 52 | 1   | 52  | 1715  | 1664  | 1938  | 152-1306 | 1307-1938  | Yes |
| NF2    | NM_000268.3  | 58 | 10  | 67  | 3657  | 3600  | 6046  | 444-2231 | 2232-6046  | Yes |
| NFAT5  | NM_001113178 | 50 | 18  | 67  | 9723  | 9674  | 13304 | 337-4983 | 4984-13304 | Yes |
| NFATC3 | XM_005255961 | 42 | 257 | 298 | 3934  | 3893  | 4137  | 316-3522 | 3523-4137  | Yes |
| NFKBIZ | NM_001005474 | 43 | 256 | 298 | 3010  | 2968  | 3801  | 283-2139 | 2140-3801  | Yes |
| NHLRC1 | NM_198586.2  | 33 | 267 | 299 | 1648  | 1616  | 2134  | 15-1202  | 1203-2134  | No  |
| NHLRC2 | NM_198514.3  | 57 | 20  | 76  | 4231  | 4175  | 6409  | 242-2422 | 2423-6409  | Yes |
| NICN1  | NM_032316.3  | 46 | 22  | 67  | 1929  | 1884  | 3227  | 86-727   | 728-3227   | No  |
| NIPAL3 | XM_005245949 | 37 | 40  | 76  | 1127  | 1091  | 1800  | 393-1073 | 1074-1800  | Yes |
| NLRC3  | NM_178844.2  | 48 | 10  | 57  | 4768  | 4721  | 6401  | 412-3609 | 3610-6401  | No  |
| NMNAT1 | NM_022787.3  | 50 | 18  | 67  | 2477  | 2428  | 3781  | 145-984  | 985-3781   | Yes |
| NMUR1  | NM_006056.4  | 33 | 267 | 299 | 2079  | 2047  | 3274  | 111-1391 | 1392-3274  | No  |
| NOL9   | NM_024654.4  | 57 | 20  | 76  | 5636  | 5580  | 6728  | 97-2205  | 2206-6728  | Yes |
| NOM1   | NM_138400.1  | 67 | 1   | 67  | 3464  | 3401  | 6082  | 16-2598  | 2599-6082  | Yes |
| NONO   | NM_001145408 | 43 | 256 | 298 | 2527  | 2485  | 3228  | 711-2126 | 2127-3228  | Yes |
| NOS1   | NM_000620.4  | 33 | 20  | 52  | 8387  | 8355  | 12189 | 712-5016 | 5017-12189 | No  |

|         |              |    |     |     |      |      |       |          |            |     |
|---------|--------------|----|-----|-----|------|------|-------|----------|------------|-----|
| NOS3    | NM_001160111 | 33 | 267 | 299 | 1943 | 1911 | 2546  | 1-1890   | 1891-2546  | No  |
| NPAP1   | NM_018958.2  | 58 | 19  | 76  | 4748 | 4691 | 8053  | 475-3945 | 3946-8053  | No  |
| NQO1    | NM_000903.2  | 34 | 257 | 290 | 1701 | 1668 | 2601  | 192-1016 | 1017-2601  | No  |
| NR5A2   | NM_001276464 | 55 | 25  | 79  | 4132 | 4078 | 4787  | 156-1565 | 1566-4787  | No  |
| NR6A1   | NM_001278546 | 57 | 1   | 57  | 4571 | 4515 | 7052  | 192-1622 | 1623-7052  | Yes |
| NRIP3   | NM_020645.2  | 53 | 5   | 57  | 3059 | 3007 | 3809  | 115-840  | 841-3809   | No  |
| NRSN1   | NM_080723.4  | 81 | 18  | 98  | 1536 | 1456 | 2408  | 238-825  | 826-2408   | No  |
| NRXN3   | NM_00110525C | 57 | 1   | 57  | 5284 | 5228 | 8659  | 954-2333 | 2334-8659  | Yes |
| NSL1    | NM_001042549 | 51 | 19  | 69  | 6069 | 6019 | 13233 | 35-676   | 677-13233  | Yes |
| NT5DC3  | NM_001031701 | 33 | 267 | 299 | 5033 | 5001 | 7214  | 42-1688  | 1689-7214  | Yes |
| NUAK2   | NM_030952.1  | 67 | 1   | 67  | 2719 | 2653 | 3443  | 128-2014 | 2015-3443  | No  |
| NUDT15  | NM_018283.1  | 34 | 18  | 51  | 1612 | 1579 | 2022  | 181-675  | 676-2022   | Yes |
| NUDT19  | NM_00110557C | 50 | 18  | 67  | 2478 | 2429 | 2984  | 1-1128   | 1129-2984  | Yes |
| NUDT4   | NM_019094.4  | 33 | 267 | 299 | 4645 | 4613 | 4810  | 399-941  | 942-4810   | No  |
| NUGGC   | NM_001010906 | 34 | 257 | 290 | 2823 | 2790 | 3912  | 144-2534 | 2535-3912  | No  |
| NUP43   | NM_198887.2  | 47 | 21  | 67  | 2726 | 2680 | 3894  | 78-1220  | 1221-3894  | Yes |
| NUSAP1  | NM_001243142 | 33 | 267 | 299 | 2294 | 2262 | 2465  | 265-1584 | 1585-2465  | Yes |
| NXN     | NM_001205319 | 35 | 256 | 290 | 1921 | 1887 | 2681  | 62-1045  | 1046-2681  | Yes |
| NXPE3   | NM_001134456 | 43 | 256 | 298 | 5186 | 5144 | 8929  | 957-2636 | 2637-8929  | No  |
| OCLN    | NM_001205254 | 47 | 21  | 67  | 3183 | 3137 | 6221  | 207-1775 | 1776-6221  | Yes |
| OGFOD3  | NM_024648.2  | 43 | 256 | 298 | 3532 | 3490 | 4300  | 153-1112 | 1113-4300  | No  |
| OGFRL1  | XM_005248765 | 57 | 20  | 76  | 2023 | 1967 | 2971  | 98-1456  | 1457-2971  | Yes |
| OLFML1  | NM_198474.3  | 59 | 10  | 68  | 2321 | 2263 | 2921  | 508-1716 | 1717-2921  | No  |
| OLFML2A | NM_001282715 | 46 | 22  | 67  | 3382 | 3337 | 5970  | 175-1491 | 1492-5970  | Yes |
| OPRK1   | NM_000912.3  | 57 | 20  | 76  | 3544 | 3488 | 4959  | 236-1378 | 1379-4959  | No  |
| OPRM1   | NM_000914.4  | 57 | 1   | 57  | 8891 | 8835 | 15279 | 444-1646 | 1647-15279 | Yes |
| OR51E2  | NM_030774.3  | 43 | 10  | 52  | 1741 | 1699 | 2785  | 245-1207 | 1208-2785  | No  |
| OR7D2   | NM_175883.2  | 42 | 257 | 298 | 1385 | 1344 | 3224  | 189-1127 | 1128-3224  | No  |
| ORAI2   | NM_00112634C | 39 | 41  | 79  | 7336 | 7298 | 10788 | 255-1019 | 1020-10788 | No  |
| ORAI3   | NM_152288.2  | 39 | 40  | 78  | 1724 | 1686 | 2205  | 207-1094 | 1095-2205  | No  |
| ORAOV1  | NM_153451.2  | 49 | 28  | 76  | 2055 | 2007 | 2544  | 159-572  | 573-2544   | Yes |
| ORC1    | NM_001190818 | 43 | 256 | 298 | 2906 | 2864 | 3189  | 229-2814 | 2815-3189  | No  |
| OSBPL2  | NM_001278649 | 58 | 10  | 67  | 2725 | 2668 | 3848  | 463-1575 | 1576-3848  | Yes |
| OSGEPL1 | XM_005246763 | 55 | 21  | 75  | 1504 | 1450 | 2055  | 80-1357  | 1358-2055  | Yes |
| OSMR    | NM_003999.2  | 58 | 10  | 67  | 4888 | 4831 | 5556  | 403-3342 | 3343-5556  | No  |
| OSTM1   | NM_014028.3  | 33 | 267 | 299 | 3642 | 3610 | 4467  | 87-1091  | 1092-4467  | Yes |
| OTUD3   | NM_015207.1  | 47 | 21  | 67  | 5103 | 5057 | 6523  | 120-1316 | 1317-6523  | Yes |
| P2RX5   | XM_005256661 | 47 | 21  | 67  | 2859 | 2813 | 4498  | 400-1719 | 1720-4498  | No  |
| P2RY2   | NM_002564.3  | 33 | 267 | 299 | 3638 | 3606 | 8602  | 335-1468 | 1469-8602  | No  |
| PACRGL  | NM_001130727 | 31 | 20  | 50  | 1355 | 1325 | 1796  | 392-763  | 764-1796   | Yes |
| PACS2   | NM_001100913 | 35 | 256 | 290 | 5108 | 5074 | 6712  | 505-3219 | 3220-6712  | Yes |

|          |              |    |     |     |      |      |       |          |            |     |
|----------|--------------|----|-----|-----|------|------|-------|----------|------------|-----|
| PAEP     | XM_005263406 | 33 | 267 | 299 | 766  | 734  | 889   | 48-359   | 360-889    | No  |
| PAFAH1B2 | NM_002572.3  | 37 | 21  | 57  | 2067 | 2031 | 4200  | 143-832  | 833-4200   | Yes |
| PAIP2B   | NM_020459.1  | 59 | 10  | 68  | 3607 | 3549 | 6300  | 188-559  | 560-6300   | Yes |
| PAK2     | NM_002577.4  | 43 | 10  | 52  | 4533 | 4491 | 6139  | 323-1897 | 1898-6139  | Yes |
| PAPLN    | NM_173462.3  | 56 | 21  | 76  | 4628 | 4573 | 5849  | 103-3858 | 3859-5849  | No  |
| PAPOLA   | NM_001252006 | 54 | 23  | 76  | 2100 | 2047 | 4013  | 218-1075 | 1076-4013  | Yes |
| PAPOLG   | NM_022894.3  | 57 | 10  | 66  | 6898 | 6842 | 7386  | 250-2460 | 2461-7386  | Yes |
| PAQR5    | NM_001104554 | 41 | 258 | 298 | 5034 | 4994 | 5480  | 669-1661 | 1662-5480  | No  |
| PAQR7    | NM_178422.5  | 58 | 10  | 67  | 2628 | 2571 | 3023  | 668-1708 | 1709-3023  | No  |
| PAQR8    | NM_133367.4  | 40 | 40  | 79  | 3783 | 3744 | 4758  | 175-1239 | 1240-4758  | Yes |
| PARD6B   | NM_032521.2  | 57 | 18  | 74  | 1990 | 1934 | 4625  | 244-1362 | 1363-4625  | Yes |
| PARD6G   | NM_032510.3  | 50 | 27  | 76  | 2343 | 2294 | 3847  | 167-1297 | 1298-3847  | Yes |
| PARP11   | NM_001286521 | 34 | 257 | 290 | 2690 | 2657 | 4377  | 342-1115 | 1116-4377  | Yes |
| PARP14   | NM_017554.2  | 54 | 14  | 67  | 6453 | 6400 | 7713  | 60-5465  | 5466-7713  | Yes |
| PARP9    | NM_001146106 | 43 | 256 | 298 | 3741 | 3699 | 6801  | 327-2459 | 2460-6801  | Yes |
| PCBD2    | NM_032151.4  | 41 | 17  | 57  | 646  | 606  | 2395  | 21-413   | 414-2395   | Yes |
| PCCB     | XM_005247510 | 39 | 30  | 68  | 3240 | 3202 | 5485  | 52-1704  | 1705-5485  | Yes |
| PCDHA9   | NM_014005.3  | 73 | 4   | 76  | 4667 | 4595 | 6388  | 725-3253 | 3254-6388  | Yes |
| PCDHB11  | NM_018931.2  | 48 | 20  | 67  | 2670 | 2623 | 3271  | Jan-94   | 2395-3271  | No  |
| PCDHB16  | NM_020957.2  | 40 | 40  | 79  | 3973 | 3934 | 4549  | 871-3201 | 3202-4549  | No  |
| PCDHB9   | NM_019119.4  | 46 | 22  | 67  | 3195 | 3150 | 4412  | 193-2586 | 2587-4412  | No  |
| PCYT1B   | NM_001163264 | 33 | 267 | 299 | 4460 | 4428 | 5507  | 231-1286 | 1287-5507  | No  |
| PDCL     | NM_005388.4  | 59 | 18  | 76  | 3043 | 2985 | 3085  | 192-1097 | 1098-3085  | Yes |
| PDDC1    | NM_182612.2  | 40 | 40  | 79  | 2726 | 2687 | 4378  | 26-688   | 689-4378   | Yes |
| PDE11A   | NM_001077196 | 43 | 256 | 298 | 6001 | 5959 | 7786  | 152-1621 | 1622-7786  | No  |
| PDE12    | NM_177966.5  | 46 | 20  | 65  | 2422 | 2377 | 3993  | 127-1956 | 1957-3993  | Yes |
| PDE6A    | NM_000440.2  | 39 | 40  | 78  | 5065 | 5027 | 5659  | 121-2703 | 2704-5659  | Yes |
| PDE6B    | NM_000283.3  | 48 | 20  | 67  | 2898 | 2851 | 3414  | 54-2618  | 2619-3414  | No  |
| PDE7A    | NM_001242318 | 48 | 10  | 57  | 5114 | 5067 | 6641  | 227-1675 | 1676-6641  | Yes |
| PDHA1    | NM_000284.3  | 54 | 23  | 76  | 2161 | 2108 | 3390  | 146-1318 | 1319-3390  | Yes |
| PDK1     | NM_001278549 | 42 | 256 | 297 | 2751 | 2710 | 4734  | 183-1553 | 1554-4734  | Yes |
| PDK3     | NM_001142386 | 33 | 267 | 299 | 3439 | 3407 | 12795 | 230-1477 | 1478-12795 | Yes |
| PDLIM2   | NM_176871.3  | 33 | 267 | 299 | 2593 | 2561 | 4608  | 132-1232 | 1233-4608  | No  |
| PDP2     | NM_020786.2  | 33 | 267 | 299 | 4209 | 4177 | 7042  | 216-1805 | 1806-7042  | Yes |
| PDPN     | NM_001006624 | 37 | 21  | 57  | 2195 | 2159 | 2652  | 228-590  | 591-2652   | Yes |
| PDSS2    | NM_020381.3  | 72 | 5   | 76  | 2176 | 2105 | 3568  | 291-1490 | 1491-3568  | Yes |
| PDXK     | NM_003681.4  | 48 | 10  | 57  | 5405 | 5358 | 7390  | 199-1137 | 1138-7390  | Yes |
| PECAM1   | NM_000442.4  | 59 | 18  | 76  | 3989 | 3931 | 6831  | 214-2430 | 2431-6831  | No  |
| PER2     | NM_022817.2  | 48 | 20  | 67  | 5460 | 5413 | 6342  | 238-4005 | 4006-6342  | Yes |
| PEX13    | NM_002618.3  | 40 | 256 | 295 | 3205 | 3166 | 4524  | 84-1295  | 1296-4524  | Yes |
| PEX2     | NM_000318.2  | 49 | 20  | 68  | 3302 | 3254 | 4392  | 459-1376 | 1377-4392  | No  |

|         |              |    |     |     |       |       |       |           |            |     |
|---------|--------------|----|-----|-----|-------|-------|-------|-----------|------------|-----|
| PEX26   | NM_001127649 | 37 | 21  | 57  | 3071  | 3035  | 4267  | 384-1301  | 1302-4267  | Yes |
| PFAS    | NM_012393.2  | 59 | 18  | 76  | 4918  | 4860  | 5400  | 142-4158  | 4159-5400  | No  |
| PGAM5   | NM_001170543 | 55 | 22  | 76  | 1842  | 1789  | 2851  | 71-940    | 941-2851   | No  |
| PGAP1   | NM_024989.3  | 40 | 40  | 79  | 6731  | 6692  | 11113 | 115-2883  | 2884-11113 | Yes |
| PGPEP1  | NM_017712.2  | 67 | 10  | 76  | 2628  | 2562  | 7084  | 85-714    | 715-7084   | Yes |
| PGS1    | XM_005257828 | 51 | 18  | 68  | 4154  | 4104  | 6169  | 43-1713   | 1714-6169  | Yes |
| PHACTR4 | NM_001048183 | 47 | 5   | 51  | 5137  | 5091  | 6225  | 283-2391  | 2392-6225  | Yes |
| PHC3    | NM_024947.3  | 31 | 257 | 287 | 10377 | 10347 | 12687 | 35-3022   | 3023-12687 | Yes |
| PHKG2   | NM_000294.2  | 48 | 10  | 57  | 3037  | 2990  | 5503  | 211-1431  | 1432-5503  | No  |
| PHLDA1  | NM_007350.3  | 56 | 21  | 76  | 3724  | 3669  | 5913  | 36-1241   | 1242-5913  | Yes |
| PHLPP2  | NM_015020.2  | 33 | 267 | 299 | 4296  | 4264  | 7919  | Jul-78    | 3979-7919  | Yes |
| PIAS2   | XM_005258377 | 49 | 19  | 67  | 4760  | 4712  | 5450  | 74-1954   | 1955-5450  | Yes |
| PIGR    | NM_002644.3  | 43 | 256 | 298 | 3293  | 3251  | 4295  | 185-2479  | 2480-4295  | No  |
| PIGW    | NM_178517.3  | 34 | 257 | 290 | 1767  | 1734  | 2255  | 56-1570   | 1571-2255  | Yes |
| PIK3C2B | NM_002646.3  | 63 | 5   | 67  | 6930  | 6868  | 7606  | 480-5384  | 5385-7606  | No  |
| PIK3CD  | NM_005026.3  | 42 | 257 | 298 | 4161  | 4120  | 5411  | 209-3343  | 3344-5411  | No  |
| PKNOX1  | NM_001286258 | 47 | 1   | 47  | 3274  | 3228  | 5180  | 391-1350  | 1351-5180  | Yes |
| PLA2G4E | NM_001206670 | 43 | 10  | 52  | 3234  | 3192  | 4798  | Jan-07    | 2608-4798  | No  |
| PLAC4   | NM_182832.2  | 36 | 256 | 291 | 6546  | 6511  | 10009 | 5612-6064 | 6065-10009 | No  |
| PLAC8   | NM_001130716 | 56 | 21  | 76  | 1088  | 1033  | 1442  | 162-509   | 510-1442   | No  |
| PLCD3   | NM_133373.3  | 62 | 18  | 79  | 3191  | 3130  | 3477  | 115-2484  | 2485-3477  | No  |
| PLCXD1  | NM_018390.3  | 58 | 10  | 67  | 2807  | 2750  | 5320  | 313-1284  | 1285-5320  | No  |
| PLD6    | NM_178836.3  | 56 | 21  | 76  | 1712  | 1657  | 2591  | 47-805    | 806-2591   | Yes |
| PLEKHA1 | NM_001001974 | 32 | 21  | 52  | 2790  | 2759  | 3891  | 250-1464  | 1465-3891  | Yes |
| PLEKHA2 | NM_021623.1  | 41 | 257 | 297 | 3975  | 3935  | 5656  | 235-1512  | 1513-5656  | Yes |
| PLEKHA5 | NM_001143821 | 49 | 28  | 76  | 3749  | 3701  | 6591  | 109-3633  | 3634-6591  | Yes |
| PLEKHG1 | NM_001029884 | 55 | 10  | 64  | 6442  | 6388  | 7237  | 313-4470  | 4471-7237  | Yes |
| PLEKHG2 | NM_022835.2  | 57 | 1   | 57  | 6381  | 6325  | 7642  | 326-4486  | 4487-7642  | No  |
| PLEKHG3 | XM_005267511 | 39 | 257 | 295 | 6170  | 6132  | 7555  | 331-4353  | 4354-7555  | No  |
| PLEKHH1 | NM_020715.2  | 47 | 21  | 67  | 4693  | 4647  | 6540  | 143-4237  | 4238-6540  | No  |
| PLEKHH2 | NM_172069.3  | 40 | 40  | 79  | 5520  | 5481  | 6972  | 84-4565   | 4566-6972  | Yes |
| PLEKHJ1 | NM_018049.1  | 55 | 19  | 73  | 760   | 706   | 1215  | 82-531    | 532-1215   | Yes |
| PLGLB1  | NM_001032392 | 38 | 30  | 67  | 2685  | 2648  | 3011  | 64-354    | 355-3011   | No  |
| PLGLB2  | NM_002665.4  | 38 | 30  | 67  | 2690  | 2653  | 3016  | 68-358    | 359-3016   | No  |
| PLXDC2  | NM_001282736 | 49 | 19  | 67  | 9131  | 9083  | 12135 | 638-2080  | 2081-12135 | Yes |
| PM20D2  | NM_001010853 | 47 | 21  | 67  | 2053  | 2007  | 4720  | 96-1406   | 1407-4720  | Yes |
| PNMA2   | NM_007257.5  | 52 | 10  | 61  | 2233  | 2182  | 4846  | 771-1865  | 1866-4846  | No  |
| PNO1    | NM_020143.2  | 41 | 257 | 297 | 1338  | 1298  | 1994  | 63-821    | 822-1994   | No  |
| PNPO    | NM_018129.3  | 58 | 10  | 67  | 1840  | 1783  | 3482  | 154-939   | 940-3482   | Yes |
| POLE3   | NM_001278255 | 54 | 22  | 75  | 1888  | 1835  | 2258  | 219-662   | 663-2258   | Yes |
| POLH    | NM_006502.2  | 45 | 23  | 67  | 6186  | 6142  | 8412  | 305-2446  | 2447-8412  | Yes |



|          |              |    |     |     |      |      |       |          |            |     |
|----------|--------------|----|-----|-----|------|------|-------|----------|------------|-----|
| POLI     | NM_007195.2  | 45 | 23  | 67  | 3593 | 3549 | 6074  | 69-2291  | 2292-6074  | Yes |
| POLR2J2  | NM_032959.5  | 58 | 10  | 67  | 1475 | 1418 | 1987  | 129-476  | 477-1987   | Yes |
| POLR2J3  | NM_001097615 | 58 | 10  | 67  | 1445 | 1388 | 1680  | 101-448  | 449-1680   | Yes |
| POLR2M   | NM_001018102 | 43 | 256 | 298 | 1672 | 1630 | 3849  | 323-958  | 959-3849   | No  |
| POMK     | NM_001277971 | 34 | 258 | 291 | 1462 | 1429 | 1527  | 172-1224 | 1225-1527  | No  |
| POU2AF1  | NM_006235.2  | 33 | 267 | 299 | 2551 | 2519 | 3032  | 256-1026 | 1027-3032  | No  |
| POU2F1   | NM_001198783 | 67 | 1   | 67  | 7020 | 6954 | 14038 | 236-2503 | 2504-14038 | Yes |
| POU2F3   | NM_001244682 | 48 | 20  | 67  | 2543 | 2497 | 2903  | 35-1351  | 1352-2903  | No  |
| PPEF2    | NM_006239.2  | 54 | 10  | 63  | 3075 | 3022 | 3430  | 358-2619 | 2620-3430  | No  |
| PPFIBP1  | NM_001198915 | 43 | 256 | 298 | 5403 | 5361 | 5807  | 532-3108 | 3109-5807  | Yes |
| PPHLN1   | NM_001143788 | 37 | 42  | 78  | 1420 | 1384 | 1620  | 106-1152 | 1153-1620  | Yes |
| PPID     | NM_005038.2  | 64 | 4   | 67  | 1572 | 1509 | 1851  | 113-1225 | 1226-1851  | Yes |
| PPIL2    | NM_014337.3  | 41 | 257 | 297 | 2070 | 2030 | 4128  | 117-1679 | 1680-4128  | Yes |
| PPIL6    | NM_001111298 | 43 | 256 | 298 | 3176 | 3134 | 4223  | 582-1595 | 1596-4223  | Yes |
| PPM1D    | NM_003620.3  | 53 | 11  | 63  | 3623 | 3571 | 4790  | 233-2050 | 2051-4790  | Yes |
| PPM1K    | NM_152542.4  | 53 | 24  | 76  | 5694 | 5642 | 6590  | 486-1604 | 1605-6590  | Yes |
| PPP1R12B | NM_001197131 | 33 | 267 | 299 | 5239 | 5207 | 8596  | 27-587   | 588-8596   | Yes |
| PPP1R15B | NM_032833.3  | 76 | 1   | 76  | 4300 | 4225 | 5284  | 406-2547 | 2548-5284  | Yes |
| PPP1R9A  | NM_00116616C | 69 | 10  | 78  | 8527 | 8459 | 10519 | 283-4407 | 4408-10519 | Yes |
| PRICKLE3 | XM_005272603 | 33 | 267 | 299 | 2316 | 2284 | 2441  | 232-1965 | 1966-2441  | No  |
| PRIM2    | NM_000947.3  | 48 | 21  | 68  | 1814 | 1767 | 2360  | 95-1624  | 1625-2360  | Yes |
| PRKAA1   | NM_006251.5  | 48 | 20  | 67  | 2319 | 2272 | 5085  | 7-1686   | 1687-5085  | Yes |
| PRKAG2   | XM_005250002 | 66 | 11  | 76  | 5006 | 4941 | 6616  | 539-2398 | 2399-6616  | Yes |
| PRKAR2A  | XM_005265314 | 48 | 10  | 57  | 2747 | 2700 | 6387  | 240-1388 | 1389-6387  | Yes |
| PRKCA    | NM_002737.2  | 47 | 21  | 67  | 6880 | 6834 | 8787  | 45-2063  | 2064-8787  | Yes |
| PRKX     | XM_005274560 | 56 | 21  | 76  | 2460 | 2405 | 2946  | 382-1458 | 1459-2946  | No  |
| PRND     | NM_012409.3  | 30 | 21  | 50  | 1580 | 1551 | 4038  | 128-658  | 659-4038   | No  |
| PROM2    | NM_001165977 | 33 | 266 | 298 | 2680 | 2648 | 2930  | 134-2638 | 2639-2930  | No  |
| PRR11    | NM_018304.3  | 47 | 21  | 67  | 3132 | 3086 | 6487  | 313-1395 | 1396-6487  | No  |
| PRR23C   | NM_001134657 | 58 | 10  | 67  | 1981 | 1924 | 2791  | 273-1061 | 1062-2791  | No  |
| PRRG4    | NM_024081.5  | 48 | 21  | 68  | 4390 | 4343 | 5538  | 262-942  | 943-5538   | No  |
| PSMB2    | NM_001199779 | 47 | 20  | 66  | 1712 | 1666 | 4391  | 120-650  | 651-4391   | Yes |
| PSMD9    | NM_00126140C | 33 | 20  | 52  | 1307 | 1275 | 2053  | 127-483  | 484-2053   | Yes |
| PSPH     | NM_004577.3  | 48 | 10  | 57  | 1777 | 1730 | 2142  | 730-1407 | 1408-2142  | Yes |
| PSTPIP2  | NM_024430.3  | 50 | 18  | 67  | 2541 | 2492 | 3054  | 97-1101  | 1102-3054  | Yes |
| PTCHD4   | NM_207499.2  | 57 | 1   | 57  | 1869 | 1813 | 3268  | 35-970   | 971-3268   | No  |
| PTGES    | NM_004878.4  | 40 | 40  | 79  | 1230 | 1191 | 1787  | 54-512   | 513-1787   | No  |
| PTGES3L  | NM_001142653 | 46 | 22  | 67  | 1589 | 1544 | 1923  | 347-847  | 848-1923   | No  |
| PTGIS    | NM_000961.3  | 57 | 1   | 57  | 4500 | 4444 | 5603  | 55-1557  | 1558-5603  | Yes |
| PTPN3    | NM_001145368 | 58 | 18  | 75  | 4798 | 4741 | 6599  | 113-2719 | 2720-6599  | No  |
| PTPRB    | NM_001109754 | 35 | 256 | 290 | 9795 | 9761 | 11332 | 46-6693  | 6694-11332 | No  |

|         |              |    |     |     |      |      |      |          |           |     |
|---------|--------------|----|-----|-----|------|------|------|----------|-----------|-----|
| PURB    | NM_033224.4  | 33 | 267 | 299 | 7781 | 7749 | 9098 | 38-976   | 977-9098  | Yes |
| PUS7    | NM_019042.3  | 47 | 5   | 51  | 3006 | 2960 | 3484 | 220-2205 | 2206-3484 | Yes |
| PVR     | NM_001135768 | 40 | 21  | 60  | 2006 | 1967 | 5769 | 300-1418 | 1419-5769 | Yes |
| PVRL4   | NM_030916.2  | 33 | 267 | 299 | 2685 | 2653 | 3520 | 300-1832 | 1833-3520 | Yes |
| PXMP4   | NM_007238.4  | 57 | 1   | 57  | 3013 | 2957 | 5727 | 124-762  | 763-5727  | Yes |
| PYGO1   | NM_015617.2  | 46 | 22  | 67  | 4479 | 4434 | 8399 | 1-1260   | 1261-8399 | Yes |
| QPCTL   | NM_001163377 | 42 | 257 | 298 | 1429 | 1388 | 2063 | 222-1088 | 1089-2063 | No  |
| QTRTD1  | NM_001256835 | 67 | 10  | 76  | 3028 | 2962 | 3917 | 116-1399 | 1400-3917 | Yes |
| R3HDM2  | NM_014925.3  | 76 | 1   | 76  | 3384 | 3309 | 3974 | 36-2966  | 2967-3974 | Yes |
| RAB11A  | NM_001206836 | 35 | 264 | 298 | 2953 | 2919 | 4848 | 128-595  | 596-4848  | Yes |
| RAB21   | NM_014999.2  | 44 | 255 | 298 | 1220 | 1177 | 2627 | 253-930  | 931-2627  | Yes |
| RAB22A  | NM_020673.2  | 49 | 28  | 76  | 6015 | 5967 | 8702 | 263-847  | 848-8702  | Yes |
| RAB2B   | NM_001163380 | 48 | 10  | 57  | 1427 | 1380 | 2883 | 167-679  | 680-2883  | Yes |
| RAB33B  | NM_031296.1  | 51 | 26  | 76  | 1607 | 1558 | 3876 | 390-1079 | 1080-3876 | Yes |
| RAB36   | NM_004914.2  | 56 | 10  | 65  | 2544 | 2489 | 3822 | 41-1042  | 1043-3822 | Yes |
| RAB37   | NM_001006638 | 44 | 25  | 68  | 1680 | 1637 | 2698 | 57-728   | 729-2698  | No  |
| RAB3D   | NM_004283.3  | 64 | 4   | 67  | 3350 | 3287 | 4290 | 262-921  | 922-4290  | No  |
| RAB5B   | NM_001252036 | 52 | 16  | 67  | 3855 | 3804 | 5299 | 181-828  | 829-5299  | Yes |
| RABL2A  | NM_013412.2  | 38 | 30  | 67  | 1547 | 1510 | 2187 | 215-901  | 902-2187  | Yes |
| RABL2B  | NM_001003789 | 38 | 30  | 67  | 1559 | 1522 | 2190 | 217-906  | 907-2190  | Yes |
| RAD21L1 | XM_005260794 | 50 | 18  | 67  | 2290 | 2241 | 2854 | 297-1967 | 1968-2854 | No  |
| RAD52   | NM_134424.2  | 42 | 257 | 298 | 2081 | 2040 | 2673 | 115-1371 | 1372-2673 | Yes |
| RAD54B  | NM_001205262 | 48 | 20  | 67  | 2908 | 2861 | 5380 | 132-485  | 486-5380  | Yes |
| RAD9B   | NM_001286531 | 39 | 28  | 66  | 2039 | 2001 | 2809 | 326-1363 | 1364-2809 | Yes |
| RAET1E  | NM_001243328 | 68 | 1   | 68  | 1923 | 1856 | 2099 | 348-986  | 987-2099  | No  |
| RAP2B   | NM_002886.3  | 43 | 256 | 298 | 7007 | 6965 | 8413 | 483-1034 | 1035-8413 | Yes |
| RAPH1   | NM_213589.2  | 39 | 40  | 78  | 8126 | 8088 | 9749 | 226-3978 | 3979-9749 | Yes |
| RARS2   | XM_005248735 | 56 | 12  | 67  | 2215 | 2160 | 2453 | 767-1978 | 1979-2453 | Yes |
| RASA4   | NM_001079877 | 30 | 261 | 290 | 4309 | 4280 | 5468 | 70-2343  | 2344-5468 | No  |
| RASAL1  | NM_001193520 | 38 | 256 | 293 | 3682 | 3645 | 3832 | 302-2722 | 2723-3832 | No  |
| RASGRF2 | NM_006909.2  | 59 | 21  | 79  | 6192 | 6134 | 8171 | 51-3764  | 3765-8171 | Yes |
| RASGRP4 | NM_001146202 | 76 | 1   | 76  | 2642 | 2567 | 3193 | 215-2194 | 2195-3193 | No  |
| RASSF2  | NM_014737.2  | 67 | 1   | 67  | 4627 | 4561 | 5426 | 197-1177 | 1178-5426 | No  |
| RBBP4   | NM_001135255 | 40 | 28  | 67  | 5498 | 5459 | 7940 | 160-1434 | 1435-7940 | Yes |
| RBM12B  | XM_005250915 | 58 | 21  | 78  | 5681 | 5625 | 6146 | 306-3311 | 3312-6146 | Yes |
| RBM3    | NM_006743.4  | 52 | 1   | 52  | 3827 | 3776 | 4432 | 235-708  | 709-4432  | Yes |
| RBM34   | NM_015014.2  | 33 | 267 | 299 | 1727 | 1695 | 1870 | 31-1323  | 1324-1870 | Yes |
| RBM4    | NM_001198844 | 52 | 28  | 78  | 2549 | 2498 | 3106 | 149-670  | 671-3106  | Yes |
| RBM43   | NM_198557.2  | 35 | 256 | 290 | 1572 | 1538 | 3914 | 149-1222 | 1223-3914 | No  |
| RBM48   | NM_032120.2  | 48 | 20  | 67  | 1435 | 1388 | 1734 | 42-1145  | 1146-1734 | No  |
| RBM7    | NM_001286045 | 63 | 5   | 67  | 2668 | 2606 | 3750 | 144-947  | 948-3750  | No  |

|         |              |    |     |     |      |      |       |           |            |     |
|---------|--------------|----|-----|-----|------|------|-------|-----------|------------|-----|
| RBM8A   | NM_005105.4  | 32 | 21  | 52  | 4419 | 4388 | 4974  | 111-635   | 636-4974   | Yes |
| RBMS2   | NM_002898.3  | 67 | 1   | 67  | 4964 | 4898 | 8504  | 200-1423  | 1424-8504  | No  |
| RBP1    | NM_001130992 | 58 | 10  | 67  | 659  | 602  | 1487  | 112-585   | 586-1487   | Yes |
| RC3H1   | NM_172071.2  | 58 | 10  | 67  | 5833 | 5776 | 10996 | 88-3489   | 3490-10996 | Yes |
| RCHY1   | NM_001009922 | 31 | 21  | 51  | 2576 | 2546 | 4420  | 145-903   | 904-4420   | Yes |
| RCSD1   | XM_005245605 | 42 | 35  | 76  | 4447 | 4406 | 5347  | 187-1347  | 1348-5347  | No  |
| RD3     | NM_001164688 | 35 | 256 | 290 | 3374 | 3340 | 4287  | 1162-1749 | 1750-4287  | No  |
| RDH10   | NM_172037.4  | 47 | 4   | 50  | 2490 | 2444 | 3981  | 689-1714  | 1715-3981  | Yes |
| REEP3   | NM_00100133C | 45 | 20  | 64  | 2933 | 2889 | 5205  | 184-951   | 952-5205   | Yes |
| RELL1   | NM_00108540C | 35 | 256 | 290 | 1658 | 1624 | 3622  | 91-906    | 907-3622   | Yes |
| REPS2   | NM_001080975 | 59 | 18  | 76  | 4122 | 4064 | 7961  | 172-2151  | 2152-7961  | Yes |
| RFFL    | NM_001017368 | 40 | 28  | 67  | 2600 | 2561 | 4137  | 174-1265  | 1266-4137  | Yes |
| RFT1    | NM_052859.3  | 57 | 20  | 76  | 4575 | 4519 | 5112  | 55-1680   | 1681-5112  | Yes |
| RFWD3   | NM_018124.3  | 37 | 41  | 77  | 3967 | 3931 | 4952  | 99-2423   | 2424-4952  | Yes |
| RHD     | NM_001127691 | 38 | 30  | 67  | 1892 | 1855 | 2549  | 63-1028   | 1029-2549  | No  |
| RHNO1   | NM_001252499 | 50 | 18  | 67  | 1100 | 1051 | 1962  | 169-885   | 886-1962   | No  |
| RHOF    | NM_019034.2  | 54 | 23  | 76  | 1862 | 1809 | 2451  | 56-691    | 692-2451   | No  |
| RHPN2   | NM_033103.4  | 45 | 23  | 67  | 3098 | 3054 | 3546  | 67-2127   | 2128-3546  | Yes |
| RINL    | NM_001195833 | 35 | 18  | 52  | 2387 | 2353 | 3062  | 88-1788   | 1789-3062  | No  |
| RIPK1   | NM_003804.3  | 36 | 43  | 78  | 2257 | 2222 | 3864  | Jan-16    | 2017-3864  | Yes |
| RIPPLY3 | NM_018962.2  | 49 | 19  | 67  | 1414 | 1366 | 2260  | 211-783   | 784-2260   | No  |
| RLIM    | NM_016120.3  | 57 | 20  | 76  | 5199 | 5143 | 10590 | 229-2103  | 2104-10590 | Yes |
| RMDN1   | NM_001286707 | 47 | 21  | 67  | 1644 | 1598 | 2952  | 161-976   | 977-2952   | No  |
| RMI1    | NM_024945.2  | 50 | 19  | 68  | 2611 | 2562 | 3508  | 409-2286  | 2287-3508  | Yes |
| RNF115  | NM_014455.3  | 35 | 256 | 290 | 1848 | 1814 | 1949  | 251-1165  | 1166-1949  | Yes |
| RNF125  | NM_017831.3  | 73 | 4   | 76  | 3562 | 3490 | 5888  | 383-1081  | 1082-5888  | Yes |
| RNF135  | NM_001184992 | 33 | 267 | 299 | 1638 | 1606 | 2254  | 137-997   | 998-2254   | No  |
| RNF144A | NM_014746.3  | 50 | 18  | 67  | 4575 | 4526 | 5740  | 443-1321  | 1322-5740  | No  |
| RNF149  | XM_005263921 | 40 | 21  | 60  | 2877 | 2838 | 3164  | 129-1409  | 1410-3164  | Yes |
| RNF152  | XM_005266650 | 55 | 13  | 67  | 6544 | 6490 | 8991  | 595-1206  | 1207-8991  | Yes |
| RNF168  | NM_152617.3  | 40 | 28  | 67  | 3053 | 3014 | 5365  | 596-2311  | 2312-5365  | Yes |
| RNF207  | NM_207396.2  | 49 | 19  | 67  | 2614 | 2566 | 3987  | 175-2079  | 2080-3987  | No  |
| RNF7    | NM_00120137C | 47 | 21  | 67  | 1270 | 1224 | 1962  | 134-427   | 428-1962   | Yes |
| RNF8    | NM_003958.3  | 52 | 19  | 70  | 2691 | 2640 | 5639  | 194-1651  | 1652-5639  | Yes |
| RP2     | NM_006915.2  | 66 | 11  | 76  | 3101 | 3036 | 3831  | 190-1242  | 1243-3831  | Yes |
| RPH3AL  | NM_001190411 | 47 | 22  | 68  | 1838 | 1792 | 2578  | 168-1115  | 1116-2578  | No  |
| RPL15   | NM_001253384 | 48 | 21  | 68  | 2090 | 2043 | 2860  | 381-818   | 819-2860   | Yes |
| RPL27A  | NM_000990.4  | 52 | 1   | 52  | 2925 | 2874 | 4906  | 367-813   | 814-4906   | Yes |
| RPL28   | NM_000991.4  | 56 | 21  | 76  | 2472 | 2417 | 4245  | 43-456    | 457-4245   | No  |
| RPL32   | NM_000994.3  | 30 | 22  | 51  | 1305 | 1276 | 1668  | 95-502    | 503-1668   | Yes |
| RPP30   | NM_006413.4  | 57 | 20  | 76  | 2126 | 2070 | 2371  | 36-842    | 843-2371   | Yes |

|         |              |    |     |     |      |      |       |          |            |     |
|---------|--------------|----|-----|-----|------|------|-------|----------|------------|-----|
| RPS24   | NM_001142285 | 32 | 36  | 67  | 1883 | 1852 | 2820  | 143-1012 | 1013-2820  | Yes |
| RPS29   | NM_001030001 | 30 | 21  | 50  | 971  | 942  | 1414  | 71-274   | 275-1414   | Yes |
| RPS3A   | NM_001267699 | 32 | 259 | 290 | 683  | 652  | 1581  | 81-257   | 258-1581   | No  |
| RRAGD   | NM_021244.4  | 48 | 21  | 68  | 3136 | 3089 | 4926  | 284-1486 | 1487-4926  | Yes |
| RRM2    | NM_001034.3  | 56 | 21  | 76  | 2620 | 2565 | 3284  | 64-1233  | 1234-3284  | Yes |
| RRP15   | NM_016052.3  | 40 | 21  | 60  | 3428 | 3389 | 7782  | 31-879   | 880-7782   | Yes |
| RSL1D1  | NM_015659.2  | 56 | 21  | 75  | 4348 | 4293 | 5137  | 74-1546  | 1547-5137  | Yes |
| RTCA    | NM_001130841 | 41 | 17  | 57  | 2304 | 2264 | 2634  | 219-1358 | 1359-2634  | No  |
| RTN4IP1 | NM_032730.4  | 44 | 256 | 299 | 2016 | 1973 | 2636  | 478-1668 | 1669-2636  | Yes |
| RUFY2   | NM_017987.4  | 57 | 20  | 76  | 3448 | 3392 | 4520  | 328-2253 | 2254-4520  | Yes |
| RUFY3   | NM_001037442 | 43 | 26  | 68  | 3459 | 3417 | 4435  | 596-2458 | 2459-4435  | Yes |
| RWDD2A  | XM_005248647 | 64 | 4   | 67  | 1760 | 1697 | 3847  | 504-1184 | 1185-3847  | No  |
| S100PBP | XM_005271124 | 33 | 20  | 52  | 2756 | 2724 | 3634  | 292-1320 | 1321-3634  | Yes |
| S1PR2   | NM_004230.3  | 43 | 256 | 298 | 1574 | 1532 | 3589  | 112-1173 | 1174-3589  | No  |
| S1PR5   | NM_001166215 | 40 | 10  | 49  | 2426 | 2387 | 2467  | 188-1384 | 1385-2467  | No  |
| SAMD5   | NM_001030060 | 35 | 256 | 290 | 1822 | 1788 | 6324  | 238-759  | 760-6324   | Yes |
| SAMHD1  | NM_015474.3  | 51 | 25  | 75  | 2479 | 2429 | 3189  | 201-2081 | 2082-3189  | Yes |
| SAR1B   | NM_001033503 | 47 | 21  | 67  | 5048 | 5002 | 6651  | 254-850  | 851-6651   | Yes |
| SARM1   | NM_015077.3  | 42 | 258 | 299 | 6212 | 6171 | 7305  | 372-2546 | 2547-7305  | Yes |
| SASH1   | NM_015278.3  | 64 | 4   | 67  | 5631 | 5568 | 7709  | 476-4219 | 4220-7709  | Yes |
| SBSPON  | NM_153225.3  | 35 | 256 | 290 | 2605 | 2571 | 3804  | 206-1000 | 1001-3804  | No  |
| SC5D    | NM_001024956 | 37 | 21  | 57  | 4210 | 4174 | 7019  | 222-1121 | 1122-7019  | No  |
| SCAI    | NM_001144877 | 66 | 10  | 75  | 3829 | 3764 | 12152 | 123-1943 | 1944-12152 | No  |
| SCAMP4  | NM_079834.2  | 36 | 22  | 57  | 1753 | 1718 | 2548  | 108-797  | 798-2548   | Yes |
| SCARB2  | NM_001204255 | 64 | 4   | 67  | 3498 | 3435 | 4340  | 357-1364 | 1365-4340  | Yes |
| SCARF1  | NM_003693.3  | 37 | 21  | 57  | 3080 | 3044 | 3502  | 93-2585  | 2586-3502  | No  |
| SCD5    | NM_001037582 | 47 | 21  | 67  | 1655 | 1609 | 3108  | 321-1313 | 1314-3108  | Yes |
| SCIMP   | XM_005256631 | 35 | 256 | 290 | 1533 | 1499 | 3034  | 948-1319 | 1320-3034  | No  |
| SCN3B   | NM_001040151 | 38 | 42  | 79  | 3266 | 3229 | 5682  | 408-1055 | 1056-5682  | Yes |
| SCN9A   | NM_002977.3  | 53 | 21  | 73  | 9025 | 8973 | 9771  | 342-6275 | 6276-9771  | Yes |
| SCNM1   | NM_001204856 | 35 | 256 | 290 | 1093 | 1059 | 2085  | 286-873  | 874-2085   | No  |
| SCUBE3  | XM_005248943 | 49 | 4   | 52  | 6008 | 5960 | 7776  | 373-3402 | 3403-7776  | No  |
| SDE2    | NM_152608.3  | 57 | 20  | 76  | 2591 | 2535 | 4029  | 54-1409  | 1410-4029  | No  |
| SEC62   | NM_003262.3  | 50 | 18  | 67  | 5781 | 5732 | 6541  | 32-1231  | 1232-6541  | Yes |
| SEC63   | NM_007214.4  | 47 | 21  | 67  | 5803 | 5757 | 6500  | 270-2552 | 2553-6500  | Yes |
| SENP5   | NM_152699.4  | 47 | 21  | 67  | 5338 | 5292 | 6324  | 250-2517 | 2518-6324  | Yes |
| SEPN1   | NM_020451.2  | 37 | 262 | 298 | 3379 | 3343 | 4357  | 56-1828  | 1829-4357  | Yes |
| SERAC1  | NM_032861.3  | 61 | 18  | 78  | 3216 | 3156 | 3969  | 143-2107 | 2108-3969  | Yes |
| SERBP1  | NM_001018067 | 32 | 21  | 52  | 5469 | 5438 | 6764  | 141-1367 | 1368-6764  | Yes |
| SERF1A  | NM_021967.2  | 48 | 20  | 67  | 1034 | 987  | 1935  | 208-540  | 541-1935   | No  |
| SERF1B  | NM_022978.2  | 48 | 20  | 67  | 1028 | 981  | 1917  | 202-534  | 535-1917   | Yes |

|          |              |    |     |     |      |      |       |           |            |     |
|----------|--------------|----|-----|-----|------|------|-------|-----------|------------|-----|
| SERHL2   | XM_005261482 | 67 | 10  | 76  | 1318 | 1252 | 1402  | 160-945   | 946-1402   | No  |
| SERINC3  | XM_005260255 | 38 | 261 | 298 | 3441 | 3404 | 4535  | 283-1683  | 1684-4535  | Yes |
| SERPINB1 | NM_030666.3  | 35 | 256 | 290 | 2230 | 2196 | 2678  | 247-1386  | 1387-2678  | Yes |
| SERPINB9 | NM_004155.5  | 40 | 40  | 79  | 3811 | 3772 | 4167  | 123-1253  | 1254-4167  | Yes |
| SF3B3    | NM_012426.4  | 67 | 10  | 76  | 7405 | 7339 | 9736  | 212-3865  | 3866-9736  | Yes |
| SFMBT2   | NM_001018039 | 50 | 18  | 67  | 3572 | 3523 | 7922  | 92-2776   | 2777-7922  | Yes |
| SFR1     | NM_001002759 | 57 | 1   | 57  | 976  | 920  | 1447  | 14-751    | 752-1447   | No  |
| SFXN1    | NM_022754.5  | 58 | 1   | 57  | 2457 | 2400 | 2991  | 139-1107  | 1108-2991  | Yes |
| SFXN2    | NM_178858.4  | 35 | 256 | 290 | 1730 | 1696 | 2562  | 167-1135  | 1136-2562  | Yes |
| SGCB     | NM_000232.4  | 49 | 19  | 67  | 3445 | 3397 | 4295  | 61-1017   | 1018-4295  | Yes |
| SGK494   | NM_001174103 | 34 | 257 | 290 | 1732 | 1699 | 3779  | 33-1265   | 1266-3779  | No  |
| SGOL1    | NM_001012409 | 67 | 1   | 67  | 2191 | 2125 | 3999  | 156-1739  | 1740-3999  | Yes |
| SGPL1    | NM_003901.3  | 63 | 5   | 67  | 2568 | 2506 | 5783  | 223-1929  | 1930-5783  | Yes |
| SGPP2    | XM_005246297 | 43 | 26  | 68  | 1710 | 1668 | 4733  | 193-1008  | 1009-4733  | No  |
| SGSH     | XM_005257583 | 43 | 256 | 298 | 1389 | 1347 | 1397  | 21-1043   | 1044-1397  | No  |
| SGTB     | NM_019072.2  | 51 | 17  | 67  | 2770 | 2720 | 5453  | 221-1135  | 1136-5453  | Yes |
| SH3BP2   | NM_001122681 | 63 | 5   | 67  | 3756 | 3694 | 9068  | 121-1806  | 1807-9068  | No  |
| SH3TC2   | NM_024577.3  | 59 | 19  | 77  | 5007 | 4949 | 26588 | 153-4019  | 4020-26588 | No  |
| SHE      | NM_001010846 | 35 | 256 | 290 | 1706 | 1672 | 6186  | 25-1512   | 1513-6186  | No  |
| SHISA2   | NM_001007538 | 41 | 257 | 297 | 1448 | 1408 | 2889  | 86-973    | 974-2889   | No  |
| SHISA9   | NM_001145205 | 59 | 18  | 76  | 2533 | 2475 | 4245  | 446-1111  | 1112-4245  | No  |
| SHOX     | NM_000451.3  | 67 | 1   | 67  | 2994 | 2928 | 3757  | 692-1570  | 1571-3757  | No  |
| SHROOM3  | NM_020859.3  | 48 | 21  | 68  | 9038 | 8991 | 11023 | 954-6944  | 6945-11023 | Yes |
| SIGLEC14 | NM_001098612 | 35 | 256 | 290 | 1685 | 1651 | 2113  | 121-1311  | 1312-2113  | No  |
| SIGLEC8  | NM_014442.2  | 57 | 20  | 76  | 2015 | 1959 | 2967  | 68-1567   | 1568-2967  | No  |
| SIKE1    | NM_001102396 | 54 | 23  | 76  | 4714 | 4661 | 5519  | 81-716    | 717-5519   | Yes |
| SIRT5    | NM_001193267 | 47 | 21  | 67  | 1788 | 1742 | 4462  | 291-1169  | 1170-4462  | No  |
| SIX4     | NM_017420.4  | 76 | 1   | 76  | 4174 | 4099 | 6277  | 61-2406   | 2407-6277  | Yes |
| SKA1     | NM_001039535 | 57 | 4   | 60  | 1640 | 1584 | 2938  | 230-997   | 998-2938   | No  |
| SKA2     | NM_001100595 | 42 | 257 | 298 | 2170 | 2129 | 2988  | 357-584   | 585-2988   | No  |
| SKIDA1   | NM_207371.3  | 33 | 267 | 299 | 6059 | 6027 | 6613  | 2254-4980 | 4981-6613  | No  |
| SKIL     | NM_001145097 | 76 | 1   | 76  | 4499 | 4424 | 7061  | 710-2626  | 2627-7061  | Yes |
| SKP2     | NM_001243120 | 42 | 257 | 298 | 2543 | 2502 | 3273  | 616-1248  | 1249-3273  | Yes |
| SLA2     | NM_032214.3  | 57 | 20  | 76  | 1982 | 1926 | 2569  | 424-1209  | 1210-2569  | No  |
| SLC10A6  | XM_005262980 | 30 | 261 | 290 | 1205 | 1176 | 1205  | 92-841    | 842-1205   | No  |
| SLC11A1  | NM_000578.3  | 37 | 256 | 292 | 2485 | 2449 | 3865  | 341-1993  | 1994-3865  | No  |
| SLC11A2  | NM_001174126 | 33 | 267 | 299 | 3550 | 3518 | 3795  | 146-1852  | 1853-3795  | Yes |
| SLC12A2  | NM_001046.2  | 44 | 24  | 67  | 5607 | 5564 | 6891  | 165-3803  | 3804-6891  | Yes |
| SLC12A3  | NM_000339.2  | 33 | 18  | 50  | 3773 | 3741 | 5582  | 30-3122   | 3123-5582  | No  |
| SLC12A6  | NM_001042494 | 47 | 30  | 76  | 6439 | 6393 | 7688  | 528-3803  | 3804-7688  | Yes |
| SLC12A8  | NM_001195483 | 58 | 10  | 67  | 2500 | 2443 | 3449  | 51-2195   | 2196-3449  | Yes |

|          |              |    |     |     |      |      |       |           |            |     |
|----------|--------------|----|-----|-----|------|------|-------|-----------|------------|-----|
| SLC13A1  | NM_022444.3  | 43 | 256 | 298 | 3290 | 3248 | 3811  | 26-1813   | 1814-3811  | No  |
| SLC15A1  | NM_005073.3  | 30 | 28  | 57  | 2502 | 2473 | 3142  | 78-2204   | 2205-3142  | Yes |
| SLC16A4  | NM_001201546 | 67 | 10  | 76  | 1847 | 1781 | 2485  | 251-1570  | 1571-2485  | No  |
| SLC16A5  | XM_005257791 | 67 | 1   | 67  | 2047 | 1981 | 3589  | 129-1631  | 1632-3589  | No  |
| SLC16A7  | NM_001270622 | 67 | 1   | 67  | 5879 | 5813 | 11919 | 307-1743  | 1744-11919 | No  |
| SLC17A5  | NM_012434.4  | 33 | 267 | 299 | 2826 | 2794 | 3333  | 129-1616  | 1617-3333  | Yes |
| SLC1A2   | NM_001195728 | 35 | 256 | 290 | 3947 | 3913 | 11659 | 258-1955  | 1956-11659 | Yes |
| SLC24A2  | NM_001193288 | 41 | 257 | 297 | 9489 | 9449 | 10806 | 154-2088  | 2089-10806 | No  |
| SLC24A4  | NM_153646.3  | 67 | 10  | 76  | 6916 | 6850 | 9757  | 24-1892   | 1893-9757  | No  |
| SLC25A15 | NM_014252.3  | 67 | 10  | 76  | 1874 | 1808 | 4038  | 323-1228  | 1229-4038  | No  |
| SLC25A32 | NM_030780.4  | 53 | 5   | 57  | 1994 | 1942 | 3133  | 399-1346  | 1347-3133  | Yes |
| SLC25A34 | NM_207348.1  | 47 | 21  | 67  | 2102 | 2056 | 3172  | 173-1087  | 1088-3172  | No  |
| SLC25A35 | NM_201520.1  | 35 | 42  | 76  | 2213 | 2179 | 2785  | 46-933    | 934-2785   | No  |
| SLC25A45 | NM_001077241 | 34 | 1   | 34  | 1641 | 1608 | 2231  | 276-1016  | 1017-2231  | No  |
| SLC25A53 | NM_001012755 | 57 | 20  | 76  | 2429 | 2373 | 6240  | 182-1105  | 1106-6240  | No  |
| SLC27A1  | NM_198580.1  | 58 | 10  | 67  | 2427 | 2370 | 3562  | 51-1991   | 1992-3562  | No  |
| SLC2A10  | NM_030777.3  | 48 | 20  | 67  | 2312 | 2265 | 4241  | 98-1723   | 1724-4241  | No  |
| SLC2A4   | NM_001042.2  | 35 | 256 | 290 | 2286 | 2252 | 3159  | 201-1730  | 1731-3159  | No  |
| SLC30A4  | NM_013309.4  | 56 | 21  | 76  | 3022 | 2967 | 4290  | 313-1602  | 1603-4290  | Yes |
| SLC30A5  | NM_001251969 | 50 | 18  | 67  | 780  | 731  | 1256  | 308-541   | 542-1256   | Yes |
| SLC30A6  | NM_001193513 | 35 | 256 | 290 | 2073 | 2039 | 4965  | 61-1566   | 1567-4965  | Yes |
| SLC30A7  | NM_001144884 | 43 | 25  | 67  | 1812 | 1770 | 7918  | 188-1318  | 1319-7918  | Yes |
| SLC35E1  | NM_024881.4  | 35 | 256 | 290 | 4241 | 4207 | 5109  | 19-1251   | 1252-5109  | Yes |
| SLC35E2  | NM_182838.2  | 42 | 10  | 51  | 3723 | 3682 | 6308  | 424-1224  | 1225-6308  | Yes |
| SLC35F1  | NM_001029858 | 43 | 256 | 298 | 2676 | 2634 | 4852  | 202-1428  | 1429-4852  | Yes |
| SLC35F2  | NM_017515.4  | 31 | 269 | 299 | 2483 | 2453 | 3184  | 422-1546  | 1547-3184  | Yes |
| SLC35F6  | NM_017877.3  | 48 | 32  | 79  | 2618 | 2571 | 3912  | 77-1192   | 1193-3912  | No  |
| SLC36A2  | NM_181776.2  | 54 | 23  | 76  | 2896 | 2843 | 3439  | 131-1582  | 1583-3439  | No  |
| SLC41A2  | NM_032148.3  | 34 | 257 | 290 | 2940 | 2907 | 3548  | 168-1889  | 1890-3548  | Yes |
| SLC44A1  | NM_00128673C | 58 | 10  | 67  | 7676 | 7619 | 9650  | 257-2215  | 2216-9650  | Yes |
| SLC47A1  | NM_018242.2  | 47 | 21  | 67  | 2373 | 2327 | 3279  | 87-1799   | 1800-3279  | Yes |
| SLC4A8   | NM_00103996C | 56 | 21  | 76  | 7555 | 7500 | 11794 | 179-3460  | 3461-11794 | Yes |
| SLC52A1  | XM_005256709 | 35 | 261 | 295 | 3176 | 3142 | 3176  | 1413-2465 | 2466-3176  | No  |
| SLC5A5   | NM_000453.2  | 41 | 28  | 68  | 2686 | 2646 | 3594  | 348-2279  | 2280-3594  | No  |
| SLC6A14  | NM_007231.4  | 53 | 21  | 73  | 3817 | 3765 | 4579  | 132-2060  | 2061-4579  | No  |
| SLC7A14  | NM_020949.2  | 40 | 28  | 67  | 7075 | 7036 | 10133 | 317-2632  | 2633-10133 | Yes |
| SLC9A7   | NM_001257291 | 47 | 21  | 67  | 3247 | 3201 | 10041 | 144-2324  | 2325-10041 | Yes |
| SLFN13   | NM_144682.5  | 52 | 40  | 91  | 5567 | 5516 | 8469  | 277-2970  | 2971-8469  | No  |
| SLU7     | NM_006425.4  | 43 | 256 | 298 | 2229 | 2187 | 3570  | 156-1916  | 1917-3570  | Yes |
| SLX4     | NM_032444.2  | 50 | 18  | 67  | 6560 | 6511 | 7304  | 628-6132  | 6133-7304  | No  |
| SMAD2    | NM_001003652 | 31 | 4   | 34  | 6346 | 6316 | 10551 | 401-1804  | 1805-10551 | Yes |

|         |              |    |     |     |      |      |       |           |            |     |
|---------|--------------|----|-----|-----|------|------|-------|-----------|------------|-----|
| SMAD4   | NM_005359.5  | 37 | 21  | 57  | 4415 | 4379 | 8789  | 539-2197  | 2198-8789  | Yes |
| SMAD9   | NM_001127217 | 38 | 20  | 57  | 4075 | 4038 | 5592  | 344-1747  | 1748-5592  | Yes |
| SMARCA5 | NM_003601.3  | 47 | 22  | 68  | 6229 | 6183 | 7926  | 463-3621  | 3622-7926  | Yes |
| SMARCE1 | XM_005257607 | 43 | 10  | 52  | 4856 | 4814 | 6630  | 1677-2807 | 2808-6630  | Yes |
| SMC5    | NM_015110.3  | 48 | 20  | 67  | 5462 | 5415 | 5965  | 118-3423  | 3424-5965  | Yes |
| SMIM12  | NM_001164824 | 30 | 49  | 78  | 2034 | 2005 | 6021  | 396-674   | 675-6021   | No  |
| SMIM14  | XM_005262645 | 37 | 28  | 64  | 3419 | 3383 | 5198  | 1-369     | 370-5198   | No  |
| SMIM17  | NM_001193628 | 38 | 20  | 57  | 1385 | 1348 | 2542  | 153-509   | 510-2542   | No  |
| SMU1    | NM_018225.2  | 48 | 21  | 67  | 2176 | 2129 | 7091  | 109-1650  | 1651-7091  | Yes |
| SNAP23  | NM_003825.3  | 30 | 261 | 290 | 1727 | 1698 | 2650  | 423-1058  | 1059-2650  | Yes |
| SNAPC1  | NM_003082.3  | 40 | 40  | 79  | 2181 | 2142 | 2684  | 105-1211  | 1212-2684  | Yes |
| SNAPC3  | NM_001039697 | 33 | 267 | 299 | 2072 | 2040 | 3095  | 97-1332   | 1333-3095  | Yes |
| SNIP1   | NM_024700.3  | 35 | 256 | 290 | 3705 | 3671 | 4605  | 116-1306  | 1307-4605  | Yes |
| SNTB2   | NM_006750.3  | 43 | 256 | 298 | 3659 | 3617 | 9771  | 21-1643   | 1644-9771  | Yes |
| SNTN    | NM_001080537 | 48 | 20  | 67  | 1266 | 1219 | 1586  | 21-464    | 465-1586   | No  |
| SNX1    | NM_001242933 | 47 | 21  | 67  | 4334 | 4288 | 7858  | 131-1804  | 1805-7858  | Yes |
| SNX15   | NM_013306.4  | 47 | 4   | 50  | 1529 | 1483 | 1957  | 131-1159  | 1160-1957  | No  |
| SNX20   | NM_182854.2  | 58 | 21  | 78  | 1355 | 1298 | 1555  | 174-1124  | 1125-1555  | No  |
| SNX21   | NM_001042632 | 48 | 20  | 67  | 2011 | 1964 | 3166  | 90-548    | 549-3166   | No  |
| SNX22   | NM_024798.2  | 67 | 1   | 67  | 1260 | 1194 | 3614  | 60-641    | 642-3614   | No  |
| SNX27   | NM_030918.5  | 35 | 256 | 290 | 4712 | 4678 | 7085  | 17-1603   | 1604-7085  | Yes |
| SOAT1   | NM_001252511 | 56 | 21  | 76  | 5530 | 5475 | 6879  | 347-1825  | 1826-6879  | Yes |
| SP140L  | NM_138402.4  | 55 | 22  | 76  | 2284 | 2230 | 2668  | 92-1834   | 1835-2668  | No  |
| SP4     | NM_003112.3  | 40 | 28  | 67  | 3965 | 3926 | 5811  | 182-2536  | 2537-5811  | Yes |
| SPAG9   | NM_001130527 | 42 | 257 | 298 | 5871 | 5830 | 8243  | 210-4145  | 4146-8243  | Yes |
| SPAST   | NM_014946.3  | 57 | 11  | 67  | 3768 | 3712 | 5221  | 222-2072  | 2073-5221  | Yes |
| SPATA5  | NM_145207.2  | 33 | 267 | 299 | 4686 | 4654 | 8152  | 74-2755   | 2756-8152  | Yes |
| SPATS2L | NM_001100422 | 43 | 4   | 46  | 3121 | 3079 | 6335  | 413-2089  | 2090-6335  | Yes |
| SPC24   | XM_005259753 | 67 | 10  | 76  | 807  | 741  | 982   | 112-567   | 568-982    | Yes |
| SPCS3   | NM_021928.3  | 67 | 1   | 67  | 4103 | 4037 | 4596  | 139-681   | 682-4596   | Yes |
| SPECC1  | NM_001033554 | 33 | 20  | 52  | 2911 | 2879 | 4901  | 204-2333  | 2334-4901  | No  |
| SPG7    | NM_199367.1  | 42 | 258 | 299 | 2171 | 2130 | 2319  | 22-1491   | 1492-2319  | Yes |
| SPN     | NM_001030288 | 46 | 18  | 63  | 1638 | 1593 | 6944  | 166-1368  | 1369-6944  | No  |
| SPP2    | XM_005246102 | 40 | 28  | 67  | 1175 | 1136 | 1658  | 85-720    | 721-1658   | No  |
| SPRED1  | NM_152594.2  | 59 | 18  | 76  | 5108 | 5050 | 7255  | 336-1670  | 1671-7255  | Yes |
| SPRED3  | NM_001042522 | 35 | 256 | 290 | 3488 | 3454 | 5075  | 104-1336  | 1337-5075  | Yes |
| SPRYD4  | NM_207344.3  | 47 | 21  | 67  | 1590 | 1544 | 2122  | 76-699    | 700-2122   | Yes |
| SPRYD7  | NM_001127482 | 63 | 3   | 65  | 2523 | 2461 | 3103  | 263-736   | 737-3103   | No  |
| SPTBN2  | XM_005274192 | 44 | 33  | 76  | 9141 | 9098 | 11166 | 619-7791  | 7792-11166 | No  |
| SPTSSA  | NM_138288.3  | 59 | 18  | 76  | 1638 | 1580 | 2538  | 56-271    | 272-2538   | No  |
| SRD5A3  | NM_024592.4  | 34 | 257 | 290 | 2694 | 2661 | 4089  | 117-1073  | 1074-4089  | Yes |

|               |              |    |     |     |       |       |       |          |            |     |
|---------------|--------------|----|-----|-----|-------|-------|-------|----------|------------|-----|
| SREK1         | NM_001077199 | 41 | 258 | 298 | 5789  | 5749  | 6782  | 160-2034 | 2035-6782  | No  |
| SRFBP1        | NM_152546.2  | 39 | 40  | 78  | 1521  | 1483  | 2836  | 73-1362  | 1363-2836  | Yes |
| SRL           | NM_001098814 | 42 | 257 | 298 | 2019  | 1978  | 4219  | 14-1435  | 1436-4219  | No  |
| SRSF1         | NM_001078166 | 30 | 23  | 52  | 3673  | 3644  | 5668  | 210-815  | 816-5668   | No  |
| SS18          | NM_001007559 | 33 | 267 | 299 | 3164  | 3132  | 3440  | 79-1335  | 1336-3440  | Yes |
| SSBP1         | XM_005250048 | 45 | 32  | 76  | 1047  | 1003  | 1420  | 76-555   | 556-1420   | Yes |
| SSR1          | NM_003144.3  | 38 | 256 | 293 | 5277  | 5240  | 9874  | 189-1049 | 1050-9874  | Yes |
| SSR3          | NM_007107.3  | 36 | 255 | 290 | 3294  | 3259  | 3734  | 96-653   | 654-3734   | Yes |
| ST6GAL2       | NM_001142351 | 33 | 257 | 289 | 3587  | 3555  | 6801  | 120-1709 | 1710-6801  | No  |
| ST8SIA1       | NM_003034.3  | 67 | 1   | 67  | 8068  | 8002  | 9737  | 483-1553 | 1554-9737  | No  |
| ST8SIA4       | NM_005668.5  | 38 | 20  | 57  | 2207  | 2170  | 6332  | 331-1410 | 1411-6332  | Yes |
| STAMBPL1      | XM_005269995 | 48 | 20  | 67  | 2871  | 2824  | 4511  | 853-2238 | 2239-4511  | Yes |
| STAR          | XM_005273619 | 33 | 267 | 299 | 1602  | 1570  | 2020  | 448-1332 | 1333-2020  | No  |
| STARD4        | NM_139164.1  | 42 | 257 | 298 | 947   | 906   | 2264  | 85-702   | 703-2264   | Yes |
| STAT2         | NM_005419.3  | 31 | 267 | 297 | 3747  | 3717  | 4576  | 204-2759 | 2760-4576  | Yes |
| STEAP2        | NM_001040665 | 37 | 21  | 57  | 3712  | 3676  | 6708  | 170-1642 | 1643-6708  | Yes |
| STEAP4        | NM_001205315 | 31 | 19  | 49  | 3269  | 3239  | 4587  | 224-1603 | 1604-4587  | No  |
| STK11         | XM_005259618 | 34 | 257 | 290 | 3428  | 3395  | 4542  | 626-1840 | 1841-4542  | Yes |
| STK17B        | NM_004226.3  | 48 | 20  | 67  | 3239  | 3192  | 5324  | 325-1443 | 1444-5324  | Yes |
| STK4          | NM_006282.2  | 47 | 21  | 67  | 4727  | 4681  | 6344  | 91-1554  | 1555-6344  | Yes |
| STMN1         | NM_001145454 | 35 | 256 | 290 | 1771  | 1737  | 2265  | 177-701  | 702-2265   | Yes |
| STOM          | NM_001270526 | 57 | 20  | 76  | 1472  | 1416  | 3107  | 118-711  | 712-3107   | Yes |
| STON1         | NM_001198595 | 33 | 258 | 290 | 4027  | 3995  | 5651  | 213-2420 | 2421-5651  | No  |
| STON2         | NM_033104.3  | 63 | 5   | 67  | 10196 | 10134 | 12957 | 310-3027 | 3028-12957 | Yes |
| STRIP2        | NM_020704.2  | 58 | 10  | 67  | 3884  | 3827  | 5115  | 41-2545  | 2546-5115  | No  |
| STX11         | NM_003764.3  | 43 | 256 | 298 | 2649  | 2607  | 5509  | 193-1056 | 1057-5509  | Yes |
| STX1B         | NM_052874.3  | 43 | 256 | 298 | 1975  | 1933  | 4544  | 113-979  | 980-4544   | No  |
| STX2          | NM_001980.3  | 42 | 257 | 298 | 1455  | 1414  | 3351  | 176-1039 | 1040-3351  | Yes |
| STYX          | NM_001130701 | 48 | 29  | 76  | 3101  | 3054  | 4631  | 63-734   | 735-4631   | Yes |
| STYXL1        | XM_005250419 | 34 | 19  | 52  | 1128  | 1095  | 1593  | 194-1042 | 1043-1593  | Yes |
| SULT1E1       | NM_005420.2  | 55 | 22  | 76  | 1276  | 1222  | 1805  | 114-998  | 999-1805   | No  |
| SUMF2         | NM_001042469 | 38 | 261 | 298 | 1658  | 1621  | 2019  | 32-949   | 950-2019   | Yes |
| SUPT7L        | NM_001282729 | 50 | 18  | 67  | 3317  | 3268  | 4542  | 607-1851 | 1852-4542  | Yes |
| SUSD5         | NM_015551.1  | 58 | 10  | 67  | 2767  | 2710  | 5005  | 419-2308 | 2309-5005  | Yes |
| SV2B          | NM_00116758C | 40 | 40  | 79  | 9365  | 9326  | 10788 | 415-2013 | 2014-10788 | Yes |
| SV2C          | XM_005248470 | 40 | 40  | 79  | 2517  | 2478  | 3252  | 443-2473 | 2474-3252  | No  |
| SVOP          | NM_018711.2  | 40 | 259 | 298 | 2704  | 2665  | 3486  | 173-1819 | 1820-3486  | No  |
| SYDE2         | NM_032184.1  | 37 | 31  | 67  | 4123  | 4087  | 4711  | 50-3634  | 3635-4711  | Yes |
| SYNJ2BP       | NM_018373.2  | 43 | 256 | 298 | 6037  | 5995  | 7074  | 128-565  | 566-7074   | Yes |
| SYNJ2BP-COX16 | NM_001202547 | 40 | 18  | 57  | 1586  | 1547  | 1955  | 128-703  | 704-1955   | No  |
| SYNPO2        | NM_001286754 | 58 | 19  | 76  | 4620  | 4563  | 7263  | 242-3934 | 3935-7263  | No  |



|         |              |    |     |     |       |       |       |           |            |     |
|---------|--------------|----|-----|-----|-------|-------|-------|-----------|------------|-----|
| SYNRG   | NM_001163544 | 48 | 20  | 67  | 5647  | 5600  | 7947  | 84-3794   | 3795-7947  | No  |
| SYS1    | NM_001099791 | 47 | 31  | 77  | 561   | 515   | 2967  | 220-450   | 451-2967   | Yes |
| SYT11   | NM_152280.4  | 34 | 18  | 51  | 1956  | 1923  | 5298  | 294-1589  | 1590-5298  | Yes |
| SYT13   | NM_001247987 | 47 | 21  | 67  | 3234  | 3188  | 5388  | 777-1625  | 1626-5388  | No  |
| SYT15   | NM_031912.4  | 58 | 10  | 67  | 2622  | 2565  | 5511  | 154-1419  | 1420-5511  | Yes |
| SYT5    | XM_005259184 | 33 | 267 | 299 | 2468  | 2436  | 3016  | 371-1531  | 1532-3016  | No  |
| TAB1    | XM_005261305 | 48 | 10  | 57  | 1860  | 1813  | 2174  | 50-1363   | 1364-2174  | No  |
| TADA3   | NM_133480.2  | 54 | 4   | 57  | 2322  | 2269  | 2846  | 824-1933  | 1934-2846  | No  |
| TAF11   | NM_001270488 | 62 | 18  | 79  | 1120  | 1059  | 1490  | 115-579   | 580-1490   | Yes |
| TAF1D   | XM_005274251 | 33 | 20  | 52  | 1655  | 1623  | 4131  | 202-1038  | 1039-4131  | No  |
| TAF7L   | NM_001168474 | 56 | 22  | 77  | 1600  | 1545  | 2203  | 117-1247  | 1248-2203  | No  |
| TAF8    | NM_138572.2  | 59 | 18  | 76  | 3936  | 3878  | 4323  | 30-962    | 963-4323   | Yes |
| TAL1    | NM_001287347 | 40 | 34  | 73  | 3657  | 3618  | 4664  | 217-1212  | 1213-4664  | No  |
| TANGO2  | NM_001283106 | 48 | 20  | 67  | 2006  | 1959  | 2463  | 352-1182  | 1183-2463  | No  |
| TAPBP   | NM_003190.4  | 33 | 267 | 299 | 2077  | 2045  | 3779  | 347-1693  | 1694-3779  | Yes |
| TAS2R20 | NM_176889.2  | 36 | 14  | 49  | 1680  | 1645  | 1914  | 1-930     | 931-1914   | No  |
| TAT     | NM_000353.2  | 35 | 256 | 290 | 2242  | 2208  | 2757  | 100-1464  | 1465-2757  | No  |
| TATDN3  | NM_001042552 | 42 | 10  | 51  | 1441  | 1400  | 2588  | 95-919    | 920-2588   | Yes |
| TBC1D15 | NM_001146213 | 48 | 20  | 67  | 3396  | 3349  | 5760  | 76-2100   | 2101-5760  | Yes |
| TBC1D20 | NM_144628.2  | 35 | 18  | 52  | 2952  | 2918  | 4456  | 139-1350  | 1351-4456  | Yes |
| TBC1D24 | NM_001199107 | 73 | 4   | 76  | 4578  | 4506  | 6607  | 141-1820  | 1821-6607  | Yes |
| TBCCD1  | NM_001134415 | 57 | 1   | 57  | 2446  | 2390  | 3080  | 481-2154  | 2155-3080  | Yes |
| TBL1Y   | XM_005262573 | 49 | 19  | 67  | 2569  | 2521  | 2675  | 1137-2231 | 2232-2675  | No  |
| TBXA2R  | NM_001060.5  | 42 | 256 | 297 | 2070  | 2029  | 2619  | 388-1419  | 1420-2619  | No  |
| TCTN2   | NM_001143850 | 67 | 1   | 67  | 2380  | 2315  | 2927  | 129-2219  | 2220-2927  | Yes |
| TDGF1   | NM_001174136 | 49 | 19  | 67  | 966   | 918   | 1784  | 43-561    | 562-1784   | No  |
| TEDDM1  | NM_172000.3  | 35 | 256 | 290 | 1164  | 1130  | 2500  | 132-953   | 954-2500   | No  |
| TENM4   | NM_001098816 | 32 | 268 | 299 | 11351 | 11320 | 13566 | 464-8773  | 8774-13566 | No  |
| TEP1    | NM_007110.4  | 47 | 21  | 67  | 9124  | 9078  | 10694 | 41-7924   | 7925-10694 | Yes |
| TERF1   | NM_003218.3  | 64 | 4   | 67  | 1804  | 1741  | 2900  | 26-1285   | 1286-2900  | Yes |
| TERF2   | NM_005652.4  | 57 | 1   | 57  | 1890  | 1834  | 2996  | 18-1646   | 1647-2996  | Yes |
| TES     | NM_015641.3  | 37 | 21  | 57  | 2252  | 2216  | 2799  | 216-1481  | 1482-2799  | Yes |
| TFB1M   | XM_005267005 | 52 | 25  | 76  | 3058  | 3007  | 5087  | 70-1110   | 1111-5087  | Yes |
| TFDP2   | NM_001178138 | 40 | 28  | 67  | 5922  | 5883  | 9946  | 673-1833  | 1834-9946  | Yes |
| TFPI    | NM_006287.4  | 40 | 40  | 79  | 2883  | 2844  | 3927  | 296-1210  | 1211-3927  | Yes |
| TGIF2   | NM_001199513 | 43 | 10  | 52  | 2342  | 2300  | 3328  | 87-800    | 801-3328   | Yes |
| TGS1    | NM_024831.6  | 33 | 267 | 299 | 3383  | 3351  | 3708  | 388-2949  | 2950-3708  | Yes |
| THAP5   | NM_001130475 | 35 | 18  | 52  | 2124  | 2090  | 3306  | 155-1342  | 1343-3306  | Yes |
| THEM4   | NM_053055.4  | 49 | 19  | 67  | 4841  | 4793  | 5172  | 428-1150  | 1151-5172  | Yes |
| THNSL1  | NM_024838.4  | 49 | 19  | 67  | 3130  | 3082  | 3787  | 330-2561  | 2562-3787  | Yes |
| THOC2   | XM_005262449 | 57 | 20  | 76  | 5779  | 5723  | 6784  | 33-4892   | 4893-6784  | Yes |

|                |              |    |     |     |      |      |      |          |           |     |
|----------------|--------------|----|-----|-----|------|------|------|----------|-----------|-----|
| THSD1          | XM_005266471 | 33 | 20  | 52  | 1824 | 1792 | 2059 | 197-1486 | 1487-2059 | No  |
| TIGD6          | NM_001243253 | 49 | 245 | 293 | 3248 | 3200 | 3988 | 763-2328 | 2329-3988 | Yes |
| TIMM10B        | NM_012192.3  | 54 | 4   | 57  | 2410 | 2357 | 2861 | 71-382   | 383-2861  | No  |
| TIMM23B        | XM_003118952 | 57 | 1   | 57  | 1578 | 1522 | 2308 | 111-677  | 678-2308  | Yes |
| TINAGL1        | NM_001204414 | 57 | 21  | 77  | 1920 | 1864 | 2159 | 127-1437 | 1438-2159 | No  |
| TLCD2          | NM_001164407 | 56 | 21  | 76  | 4592 | 4537 | 5901 | 127-921  | 922-5901  | No  |
| TM4SF20        | NM_024795.3  | 56 | 21  | 76  | 1163 | 1108 | 2310 | 39-728   | 729-2310  | No  |
| TMED10         | NM_006827.5  | 49 | 28  | 76  | 3343 | 3295 | 4163 | 68-727   | 728-4163  | Yes |
| TMED4          | XM_005249651 | 37 | 21  | 57  | 1352 | 1316 | 2198 | 77-613   | 614-2198  | Yes |
| TMEM105        | NM_178520.3  | 46 | 22  | 67  | 2184 | 2139 | 3335 | 551-940  | 941-3335  | No  |
| TMEM119        | NM_181724.2  | 42 | 257 | 298 | 1892 | 1851 | 2701 | 164-1015 | 1016-2701 | No  |
| TMEM120B       | NM_001080825 | 42 | 27  | 68  | 2367 | 2326 | 7510 | 145-1164 | 1165-7510 | Yes |
| TMEM127        | NM_001193304 | 66 | 11  | 76  | 3394 | 3329 | 4570 | 254-970  | 971-4570  | Yes |
| TMEM128        | NM_032927.2  | 71 | 9   | 79  | 1122 | 1052 | 1750 | 583-1008 | 1009-1750 | Yes |
| TMEM136        | NM_001198670 | 33 | 267 | 299 | 3531 | 3499 | 4462 | 495-1298 | 1299-4462 | Yes |
| TMEM159        | NM_020422.4  | 52 | 1   | 52  | 1687 | 1636 | 1922 | 362-847  | 848-1922  | Yes |
| TMEM169        | NM_001142310 | 44 | 256 | 299 | 2217 | 2174 | 3477 | 327-1220 | 1221-3477 | No  |
| TMEM170A       | XM_005255795 | 67 | 1   | 67  | 1979 | 1913 | 4770 | 85-450   | 451-4770  | Yes |
| TMEM170B       | NM_001100829 | 48 | 20  | 67  | 5048 | 5001 | 8413 | 52-450   | 451-8413  | Yes |
| TMEM184C       | NM_018241.2  | 40 | 18  | 57  | 2325 | 2286 | 2986 | 570-1886 | 1887-2986 | Yes |
| TMEM185B       | NM_024121.2  | 63 | 5   | 67  | 2821 | 2759 | 5938 | 433-1485 | 1486-5938 | No  |
| TMEM192        | NM_001100389 | 34 | 18  | 51  | 2957 | 2924 | 4511 | 100-915  | 916-4511  | Yes |
| TMEM209        | NM_032842.3  | 65 | 4   | 68  | 2345 | 2281 | 3560 | 124-1809 | 1810-3560 | Yes |
| TMEM236        | NM_001098844 | 50 | 18  | 67  | 2027 | 1978 | 5454 | 36-1091  | 1092-5454 | No  |
| TMEM248        | NM_017994.4  | 33 | 267 | 299 | 2577 | 2545 | 4238 | 265-1209 | 1210-4238 | No  |
| TMEM33         | NM_018126.2  | 57 | 20  | 76  | 5763 | 5707 | 7717 | 366-1109 | 1110-7717 | Yes |
| TMEM41B        | NM_015012.3  | 67 | 10  | 76  | 1830 | 1764 | 3973 | 328-1203 | 1204-3973 | Yes |
| TMEM52B        | NM_001079815 | 31 | 22  | 52  | 2122 | 2092 | 2563 | 348-899  | 900-2563  | No  |
| TMPO           | NM_001032283 | 33 | 267 | 299 | 3179 | 3147 | 4186 | 296-1660 | 1661-4186 | Yes |
| TMPRSS3        | NM_001256317 | 47 | 21  | 67  | 1891 | 1845 | 2460 | 202-1563 | 1564-2460 | No  |
| TMTC1          | NM_001193451 | 43 | 19  | 61  | 5598 | 5556 | 8750 | 60-2708  | 2709-8750 | Yes |
| TNFAIP2        | NM_006291.2  | 43 | 256 | 298 | 3317 | 3275 | 4180 | 132-2096 | 2097-4180 | No  |
| TNFAIP8L1      | NM_001167942 | 48 | 21  | 68  | 2762 | 2717 | 3845 | 147-707  | 708-3845  | No  |
| TNFAIP8L2-SCN1 | NM_001204848 | 35 | 256 | 290 | 956  | 922  | 1948 | 149-736  | 737-1948  | No  |
| TNFRSF10B      | NM_003842.4  | 72 | 5   | 76  | 3737 | 3666 | 4154 | 294-1616 | 1617-4154 | Yes |
| TNFRSF9        | NM_001561.5  | 37 | 43  | 79  | 4057 | 4021 | 6001 | 262-1029 | 1030-6001 | No  |
| TNFSF15        | NM_001204344 | 30 | 20  | 49  | 4246 | 4217 | 6412 | 1-579    | 580-6412  | No  |
| TNFSF9         | NM_003811.3  | 40 | 22  | 61  | 1545 | 1506 | 1680 | 39-803   | 804-1680  | No  |
| TNNI1          | NM_003281.3  | 47 | 21  | 67  | 1993 | 1947 | 6162 | 94-657   | 658-6162  | No  |
| TNS4           | NM_032865.5  | 34 | 19  | 52  | 3165 | 3132 | 4090 | 165-2312 | 2313-4090 | No  |
| TOR1AIP2       | NM_001199260 | 40 | 40  | 79  | 4718 | 4679 | 8331 | 815-2227 | 2228-8331 | Yes |

|          |              |    |     |     |      |      |       |          |            |     |
|----------|--------------|----|-----|-----|------|------|-------|----------|------------|-----|
| TOR1B    | NM_014506.1  | 34 | 19  | 52  | 1335 | 1302 | 2774  | 61-1071  | 1072-2774  | Yes |
| TOR4A    | NM_017723.2  | 75 | 2   | 76  | 3791 | 3717 | 4069  | 118-1389 | 1390-4069  | No  |
| TOX4     | NM_014828.2  | 57 | 11  | 67  | 3030 | 2974 | 4538  | 104-1969 | 1970-4538  | Yes |
| TP53     | NM_000546.5  | 39 | 40  | 78  | 2405 | 2367 | 2591  | 203-1384 | 1385-2591  | Yes |
| TP53BP1  | XM_005254634 | 50 | 18  | 67  | 7414 | 7365 | 10261 | 24-5942  | 5943-10261 | Yes |
| TPM3     | NM_001043351 | 50 | 18  | 67  | 2413 | 2364 | 3212  | 131-877  | 878-3212   | Yes |
| TPMT     | NM_000367.2  | 54 | 4   | 57  | 1419 | 1366 | 3258  | 156-893  | 894-3258   | Yes |
| TRAF3IP1 | NM_00113949C | 58 | 10  | 67  | 3328 | 3271 | 3985  | 120-1997 | 1998-3985  | Yes |
| TRAF3IP2 | NM_001164281 | 67 | 1   | 67  | 5650 | 5584 | 6241  | 508-2202 | 2203-6241  | Yes |
| TRAF5    | NM_00103391C | 48 | 20  | 67  | 2934 | 2887 | 4013  | 86-1759  | 1760-4013  | Yes |
| TRAF6    | NM_004620.3  | 65 | 4   | 68  | 4747 | 4683 | 7947  | 289-1857 | 1858-7947  | Yes |
| TRAPPC2  | NM_001011658 | 67 | 10  | 76  | 1789 | 1723 | 2869  | 273-695  | 696-2869   | Yes |
| TRDMT1   | NM_004412.5  | 35 | 256 | 290 | 5449 | 5415 | 7687  | 438-1613 | 1614-7687  | Yes |
| TRIM13   | NM_001007278 | 49 | 4   | 52  | 2170 | 2122 | 6975  | 419-1651 | 1652-6975  | Yes |
| TRIM16   | NM_006470.3  | 43 | 256 | 298 | 2501 | 2459 | 2920  | 558-2252 | 2253-2920  | Yes |
| TRIM16L  | NM_00103733C | 47 | 21  | 67  | 1659 | 1613 | 1982  | 278-1324 | 1325-1982  | Yes |
| TRIM45   | NM_001145635 | 33 | 267 | 299 | 2840 | 2808 | 3527  | 589-2277 | 2278-3527  | Yes |
| TRIM5    | NM_033034.2  | 47 | 21  | 67  | 2519 | 2473 | 3399  | 304-1785 | 1786-3399  | Yes |
| TRIM59   | NM_173084.2  | 42 | 27  | 68  | 2145 | 2104 | 3886  | 196-1407 | 1408-3886  | Yes |
| TRIM6    | NM_001003818 | 59 | 18  | 76  | 2072 | 2014 | 3430  | 264-1814 | 1815-3430  | No  |
| TRIM65   | NM_001256124 | 30 | 32  | 61  | 2233 | 2204 | 3393  | 67-1554  | 1555-3393  | Yes |
| TRIM66   | NM_014818.1  | 41 | 21  | 61  | 7577 | 7537 | 9753  | 196-3846 | 3847-9753  | No  |
| TRIM68   | NM_018073.6  | 57 | 20  | 76  | 2654 | 2598 | 3372  | 291-1748 | 1749-3372  | No  |
| TRIM7    | NM_203293.2  | 33 | 267 | 299 | 2544 | 2512 | 2978  | 184-1719 | 1720-2978  | Yes |
| TRIP11   | NM_004239.3  | 39 | 40  | 78  | 6982 | 6944 | 8106  | 375-6314 | 6315-8106  | Yes |
| TRMT5    | NM_020810.2  | 37 | 263 | 299 | 3114 | 3078 | 5302  | 92-1621  | 1622-5302  | Yes |
| TRPM6    | NM_00117731C | 30 | 21  | 50  | 7063 | 7034 | 8250  | 73-6126  | 6127-8250  | No  |
| TRPM7    | NM_017672.4  | 42 | 257 | 298 | 7587 | 7546 | 10404 | 283-5880 | 5881-10404 | Yes |
| TRPV1    | NM_018727.5  | 67 | 10  | 76  | 3136 | 3070 | 4074  | 159-2678 | 2679-4074  | Yes |
| TSPAN31  | NM_005981.3  | 35 | 256 | 290 | 1300 | 1266 | 1749  | 155-787  | 788-1749   | Yes |
| TSPYL1   | NM_003309.3  | 41 | 256 | 296 | 2259 | 2219 | 5259  | 288-1601 | 1602-5259  | Yes |
| TTC21B   | NM_024753.4  | 58 | 19  | 76  | 4621 | 4564 | 5491  | 134-4084 | 4085-5491  | Yes |
| TTC26    | NM_00114492C | 42 | 257 | 298 | 2518 | 2477 | 4216  | 115-1578 | 1579-4216  | Yes |
| TTC39C   | NM_001135993 | 43 | 23  | 65  | 4774 | 4732 | 5253  | 453-2204 | 2205-5253  | Yes |
| TTL      | NM_153712.4  | 39 | 21  | 59  | 3641 | 3603 | 5181  | 180-1313 | 1314-5181  | Yes |
| TUFT1    | NM_001126337 | 45 | 21  | 65  | 2532 | 2488 | 3083  | 63-1160  | 1161-3083  | Yes |
| TVP23A   | NM_001079512 | 67 | 1   | 67  | 1554 | 1488 | 3339  | 272-913  | 914-3339   | No  |
| TVP23C   | NM_001135036 | 30 | 20  | 49  | 1731 | 1702 | 4244  | 184-795  | 796-4244   | No  |
| TXNDC15  | NM_024715.3  | 43 | 25  | 67  | 2983 | 2941 | 3689  | 659-1741 | 1742-3689  | Yes |
| TXNL4B   | NM_001142317 | 40 | 10  | 49  | 1483 | 1444 | 2514  | 263-712  | 713-2514   | Yes |
| TXNRD2   | NM_001282512 | 48 | 20  | 67  | 1478 | 1431 | 2081  | 190-1206 | 1207-2081  | Yes |

|        |              |    |     |     |       |       |       |          |             |     |
|--------|--------------|----|-----|-----|-------|-------|-------|----------|-------------|-----|
| TYSND1 | NM_001040273 | 54 | 5   | 58  | 2507  | 2454  | 3481  | 155-1351 | 1352-3481   | Yes |
| UAP1L1 | NM_207309.2  | 38 | 18  | 55  | 3148  | 3111  | 3401  | 33-1556  | 1557-3401   | No  |
| UBA52  | NM_00103393C | 33 | 267 | 299 | 2234  | 2202  | 2823  | 115-501  | 502-2823    | No  |
| UBE2G1 | NM_003342.4  | 56 | 21  | 76  | 3002  | 2947  | 4208  | 359-871  | 872-4208    | No  |
| UBE2W  | NM_001001481 | 36 | 40  | 75  | 5450  | 5415  | 8459  | 2-577    | 578-8459    | Yes |
| UBR2   | NM_001184801 | 39 | 22  | 60  | 1972  | 1934  | 2493  | 299-1618 | 1619-2493   | Yes |
| UBXN2B | NM_001077619 | 48 | 10  | 57  | 1895  | 1848  | 5088  | 123-1118 | 1119-5088   | Yes |
| UEVLD  | XM_005253001 | 66 | 11  | 76  | 797   | 732   | 1016  | 53-700   | 701-1016    | Yes |
| UFD1L  | XM_005261276 | 33 | 267 | 299 | 4742  | 4710  | 5059  | 212-1030 | 1031-5059   | Yes |
| UFM1   | NM_001286703 | 54 | 4   | 57  | 2184  | 2131  | 2630  | 150-401  | 402-2630    | Yes |
| UGDH   | NM_00118470C | 40 | 11  | 50  | 1856  | 1817  | 3013  | 324-1607 | 1608-3013   | Yes |
| UGGT1  | NM_020120.3  | 47 | 21  | 67  | 9514  | 9468  | 10802 | 179-4846 | 4847-10802  | No  |
| UHMK1  | NM_001184763 | 45 | 20  | 64  | 3604  | 3560  | 8194  | 78-1115  | 1116-8194   | Yes |
| ULBP1  | NM_025218.2  | 59 | 18  | 76  | 1398  | 1340  | 3160  | 44-778   | 779-3160    | Yes |
| ULBP3  | XM_005267138 | 34 | 1   | 34  | 1054  | 1021  | 1671  | 129-521  | 522-1671    | Yes |
| ULK2   | NM_014683.3  | 55 | 1   | 55  | 6954  | 6900  | 9165  | 510-3620 | 3621-9165   | No  |
| UMPS   | NM_000373.3  | 42 | 257 | 298 | 1939  | 1898  | 6738  | 107-1549 | 1550-6738   | Yes |
| UNC45B | NM_001033576 | 32 | 18  | 49  | 4948  | 4917  | 5688  | 98-2887  | 2888-5688   | No  |
| UPK3BL | NM_001114403 | 58 | 10  | 67  | 1107  | 1050  | 1360  | 51-842   | 843-1360    | No  |
| UQCRQ  | NM_014402.4  | 56 | 21  | 76  | 864   | 810   | 1585  | 75-323   | 324-1585    | Yes |
| USP13  | NM_003940.2  | 34 | 257 | 290 | 6196  | 6163  | 7933  | 82-2673  | 2674-7933   | Yes |
| USP15  | NM_001252078 | 37 | 43  | 79  | 6509  | 6473  | 8367  | 76-3021  | 3022-8367   | Yes |
| USP26  | XM_005262478 | 34 | 266 | 299 | 3702  | 3669  | 4060  | 471-3212 | 3213-4060   | Yes |
| USP28  | NM_020886.2  | 47 | 30  | 76  | 4209  | 4163  | 4642  | 34-3267  | 3268-4642   | Yes |
| USP3   | NM_001256702 | 37 | 21  | 57  | 2889  | 2853  | 5474  | 230-1660 | 1661-5474   | Yes |
| USP33  | NM_015017.4  | 76 | 1   | 76  | 3584  | 3509  | 4551  | 375-3203 | 3204-4551   | Yes |
| USP4   | NM_001251877 | 33 | 267 | 299 | 1404  | 1372  | 1673  | 80-1021  | 1022-1673   | Yes |
| USP46  | NM_001134223 | 49 | 19  | 67  | 6291  | 6243  | 8057  | 283-1362 | 1363-8057   | Yes |
| USP9X  | NM_00103959C | 49 | 28  | 76  | 10519 | 10471 | 12401 | 634-8346 | 8347-12401  | Yes |
| UTP11L | NM_016037.3  | 58 | 22  | 79  | 1205  | 1148  | 2067  | 92-853   | 854-2067    | Yes |
| UTP15  | NM_00128443C | 45 | 21  | 65  | 4189  | 4145  | 5038  | 256-1755 | 1756-5038   | Yes |
| UTY    | XM_005262532 | 59 | 18  | 76  | 3668  | 3610  | 3833  | 356-3586 | 3587-3833   | No  |
| UVSSA  | NM_020894.2  | 61 | 18  | 78  | 3480  | 3420  | 4665  | 448-2577 | 2578-4665   | No  |
| VAPA   | NM_003574.5  | 34 | 257 | 290 | 4064  | 4031  | 6994  | 300-1184 | 1185-6994   | Yes |
| VENTX  | NM_014468.3  | 76 | 1   | 76  | 1189  | 1114  | 2422  | 12-788   | 789-2422    | No  |
| VGLL3  | NM_016206.2  | 31 | 22  | 52  | 8869  | 8839  | 10396 | 365-1345 | 1346-10396  | Yes |
| VHL    | NM_000551.3  | 48 | 20  | 67  | 3527  | 3480  | 4560  | 214-855  | 856-4560    | Yes |
| VIPR2  | NM_003382.4  | 38 | 20  | 57  | 1901  | 1866  | 3961  | 187-1503 | 1504-3961   | No  |
| VMA21  | NM_00101798C | 53 | 24  | 76  | 1888  | 1837  | 4760  | 125-430  | 431-4760    | Yes |
| VMAC   | NM_001017921 | 48 | 20  | 67  | 1042  | 995   | 1708  | 51-560   | 561-1708    | No  |
| VPS13C | NM_017684.4  | 34 | 257 | 290 | 11681 | 11648 | 13312 | 92-11224 | 11225-13312 | Yes |

|          |              |    |     |     |      |      |       |          |            |     |
|----------|--------------|----|-----|-----|------|------|-------|----------|------------|-----|
| VPS33A   | NM_022916.4  | 67 | 1   | 67  | 2239 | 2173 | 2628  | 114-1904 | 1905-2628  | Yes |
| VPS53    | NM_001128159 | 33 | 35  | 67  | 3119 | 3087 | 13106 | 148-2646 | 2647-13106 | Yes |
| VSIG1    | NM_001170553 | 67 | 1   | 67  | 1923 | 1857 | 3236  | 162-1433 | 1434-3236  | No  |
| VSIG10   | NM_019086.5  | 43 | 256 | 298 | 2393 | 2351 | 5003  | 335-1957 | 1958-5003  | No  |
| VTI1A    | XM_005269544 | 63 | 4   | 66  | 1409 | 1347 | 2061  | 341-952  | 953-2061   | Yes |
| VWA2     | NM_001272046 | 43 | 10  | 52  | 4217 | 4175 | 5857  | 327-2594 | 2595-5857  | No  |
| WDR31    | XM_005251690 | 51 | 10  | 60  | 2936 | 2886 | 4759  | 306-1409 | 1410-4759  | No  |
| WDR33    | NM_018383.4  | 34 | 19  | 52  | 5566 | 5533 | 6315  | 200-4210 | 4211-6315  | Yes |
| WDR55    | NM_017706.4  | 47 | 21  | 67  | 2104 | 2058 | 2580  | 115-1266 | 1267-2580  | Yes |
| WDR76    | NM_001167941 | 63 | 5   | 67  | 2284 | 2222 | 3927  | 202-1890 | 1891-3927  | Yes |
| WDR87    | XM_005259304 | 52 | 1   | 52  | 9159 | 9108 | 9268  | 171-8909 | 8910-9268  | No  |
| WFDC8    | NM_181510.2  | 47 | 21  | 67  | 918  | 872  | 1269  | 80-805   | 806-1269   | No  |
| WHAMM    | NM_001080435 | 35 | 256 | 290 | 2743 | 2709 | 3859  | 100-2529 | 2530-3859  | Yes |
| WHSC1    | NM_133334.2  | 30 | 23  | 52  | 5981 | 5952 | 8390  | 30-1973  | 1974-8390  | Yes |
| WNK3     | NM_001002838 | 57 | 20  | 76  | 6397 | 6341 | 11185 | 440-5671 | 5672-11185 | Yes |
| WNT9B    | XM_005257637 | 40 | 40  | 79  | 1486 | 1447 | 2654  | 54-1043  | 1044-2654  | No  |
| WWC3     | NM_015691.3  | 37 | 40  | 76  | 5603 | 5567 | 6463  | 199-3477 | 3478-6463  | No  |
| WWTR1    | NM_001168278 | 67 | 1   | 67  | 2468 | 2402 | 5052  | 258-1460 | 1461-5052  | Yes |
| XIAP     | NM_001167.3  | 33 | 267 | 299 | 3718 | 3686 | 8460  | 160-1653 | 1654-8460  | Yes |
| XKR5     | NM_207411.4  | 33 | 19  | 51  | 3425 | 3393 | 4908  | 152-2212 | 2213-4908  | No  |
| XPNPEP3  | NM_022098.3  | 48 | 20  | 67  | 4526 | 4479 | 8027  | 102-1625 | 1626-8027  | Yes |
| XRCC2    | NM_005431.1  | 47 | 5   | 51  | 1306 | 1260 | 3094  | 87-929   | 930-3094   | Yes |
| YAF2     | NM_001190980 | 39 | 22  | 60  | 1456 | 1418 | 5095  | 170-523  | 524-5095   | Yes |
| YES1     | NM_005433.3  | 43 | 256 | 298 | 3228 | 3186 | 4685  | 222-1853 | 1854-4685  | Yes |
| YIPF6    | NM_001195214 | 56 | 19  | 74  | 4799 | 4744 | 6153  | 286-867  | 868-6153   | Yes |
| YTHDC1   | NM_001031732 | 41 | 18  | 58  | 4618 | 4578 | 6249  | 354-2537 | 2538-6249  | Yes |
| ZBTB24   | NM_014797.2  | 55 | 21  | 75  | 3433 | 3379 | 5597  | 169-2262 | 2263-5597  | Yes |
| ZBTB25   | XM_005268049 | 54 | 4   | 57  | 2789 | 2736 | 3921  | 343-2025 | 2026-3921  | Yes |
| ZBTB3    | NM_024784.3  | 47 | 4   | 50  | 2679 | 2633 | 2990  | 123-1847 | 1848-2990  | Yes |
| ZBTB40   | NM_001083621 | 41 | 20  | 60  | 6506 | 6466 | 8992  | 512-4231 | 4232-8992  | Yes |
| ZBTB44   | NM_014155.4  | 38 | 42  | 79  | 3121 | 3084 | 9351  | 395-1756 | 1757-9351  | Yes |
| ZBTB8A   | NM_001040441 | 58 | 10  | 67  | 4676 | 4619 | 7333  | 486-1811 | 1812-7333  | Yes |
| ZBTB8OS  | XM_005270799 | 42 | 257 | 298 | 1422 | 1381 | 1959  | 399-917  | 918-1959   | Yes |
| ZC3H12B  | NM_001010888 | 33 | 20  | 52  | 3130 | 3098 | 7273  | 68-2578  | 2579-7273  | No  |
| ZC3H12D  | NM_207360.2  | 53 | 26  | 78  | 3214 | 3162 | 4907  | 271-1854 | 1855-4907  | Yes |
| ZC3H6    | NM_198581.2  | 58 | 10  | 67  | 8953 | 8896 | 11557 | 395-3964 | 3965-11557 | Yes |
| ZC3HAV1  | NM_020119.3  | 33 | 267 | 299 | 3562 | 3530 | 7190  | 389-3097 | 3098-7190  | Yes |
| ZC3HAV1L | NM_080660.3  | 40 | 40  | 79  | 1568 | 1529 | 1802  | 13-915   | 916-1802   | No  |
| ZCCHC4   | NM_024936.2  | 38 | 30  | 67  | 1982 | 1945 | 2814  | 37-1578  | 1579-2814  | Yes |
| ZCCHC8   | NM_017612.4  | 62 | 4   | 65  | 3173 | 3112 | 4260  | 234-2357 | 2358-4260  | Yes |
| ZDBF2    | NM_001285549 | 67 | 1   | 67  | 8351 | 8285 | 10214 | 308-7366 | 7367-10214 | Yes |

|         |              |    |     |     |       |       |       |           |            |     |
|---------|--------------|----|-----|-----|-------|-------|-------|-----------|------------|-----|
| ZDHHC20 | NM_001286638 | 38 | 20  | 57  | 2881  | 2844  | 5333  | 362-1240  | 1241-5333  | Yes |
| ZFAND5  | NM_00110242C | 33 | 18  | 50  | 5109  | 5077  | 5887  | 699-1340  | 1341-5887  | Yes |
| ZFP3    | NM_153018.2  | 38 | 256 | 293 | 1859  | 1822  | 5011  | 126-1634  | 1635-5011  | No  |
| ZFP30   | NM_014898.2  | 42 | 10  | 51  | 4065  | 4024  | 4611  | 559-2118  | 2119-4611  | Yes |
| ZFP42   | NM_174900.3  | 32 | 21  | 52  | 2064  | 2033  | 2646  | 409-1341  | 1342-2646  | No  |
| ZFP64   | NM_018197.2  | 47 | 21  | 67  | 2630  | 2584  | 3281  | 350-2395  | 2396-3281  | Yes |
| ZFX     | NM_001178084 | 52 | 1   | 52  | 4211  | 4160  | 7396  | 100-2517  | 2518-7396  | Yes |
| ZIK1    | XM_005258766 | 42 | 20  | 61  | 3686  | 3645  | 4255  | 218-1642  | 1643-4255  | No  |
| ZKSCAN3 | NM_001242894 | 56 | 21  | 76  | 2725  | 2670  | 4842  | 334-1950  | 1951-4842  | Yes |
| ZKSCAN7 | NM_025169.1  | 33 | 267 | 299 | 1399  | 1367  | 1792  | 417-1247  | 1248-1792  | No  |
| ZMYM6   | NM_007167.3  | 48 | 10  | 57  | 4737  | 4690  | 5159  | 229-4206  | 4207-5159  | Yes |
| ZNF117  | NM_015852.3  | 50 | 18  | 67  | 4543  | 4494  | 6404  | 1286-2737 | 2738-6404  | Yes |
| ZNF2    | NM_001017396 | 57 | 1   | 57  | 3367  | 3311  | 3908  | 538-1689  | 1690-3908  | Yes |
| ZNF208  | NM_007153.3  | 32 | 20  | 51  | 6126  | 6095  | 9088  | 150-3992  | 3993-9088  | No  |
| ZNF234  | NM_001144824 | 30 | 10  | 39  | 3504  | 3475  | 4482  | 190-2292  | 2293-4482  | Yes |
| ZNF250  | NM_001109689 | 50 | 18  | 67  | 3363  | 3314  | 6367  | 118-1785  | 1786-6367  | Yes |
| ZNF260  | NM_001012756 | 57 | 1   | 57  | 4656  | 4600  | 5474  | 923-2161  | 2162-5474  | No  |
| ZNF264  | NM_003417.4  | 67 | 1   | 67  | 10124 | 10058 | 12172 | 415-2298  | 2299-12172 | Yes |
| ZNF273  | NM_021148.2  | 49 | 19  | 67  | 2760  | 2712  | 4325  | 77-1786   | 1787-4325  | Yes |
| ZNF28   | NM_006969.3  | 47 | 21  | 67  | 4006  | 3960  | 4608  | 158-2314  | 2315-4608  | Yes |
| ZNF286A | NM_001130842 | 35 | 256 | 290 | 2666  | 2632  | 5472  | 397-1962  | 1963-5472  | No  |
| ZNF286B | NM_001145045 | 35 | 256 | 290 | 2524  | 2490  | 5328  | 252-1820  | 1821-5328  | No  |
| ZNF316  | NM_001278559 | 58 | 10  | 67  | 6108  | 6051  | 7239  | 557-3571  | 3572-7239  | No  |
| ZNF320  | NM_207333.2  | 37 | 21  | 57  | 2095  | 2059  | 6145  | 192-1721  | 1722-6145  | Yes |
| ZNF329  | NM_024620.3  | 37 | 21  | 57  | 2365  | 2329  | 3426  | 238-1863  | 1864-3426  | Yes |
| ZNF331  | NM_001079906 | 36 | 22  | 57  | 2805  | 2770  | 4151  | 423-1814  | 1815-4151  | Yes |
| ZNF345  | NM_001242472 | 41 | 4   | 44  | 2381  | 2341  | 2965  | 215-1681  | 1682-2965  | Yes |
| ZNF391  | XM_005249081 | 36 | 256 | 291 | 2644  | 2609  | 3884  | 351-1427  | 1428-3884  | Yes |
| ZNF43   | NM_001256648 | 35 | 256 | 290 | 5299  | 5265  | 5771  | 702-3113  | 3114-5771  | Yes |
| ZNF440  | NM_152357.2  | 58 | 10  | 67  | 3261  | 3204  | 4181  | 157-1944  | 1945-4181  | Yes |
| ZNF443  | XM_005259705 | 43 | 256 | 298 | 4335  | 4293  | 5282  | Jan-22    | 2023-5282  | Yes |
| ZNF445  | NM_181489.5  | 54 | 23  | 76  | 6387  | 6334  | 10264 | 349-3444  | 3445-10264 | Yes |
| ZNF451  | NM_001257273 | 42 | 257 | 298 | 7726  | 7685  | 9558  | 245-1924  | 1925-9558  | Yes |
| ZNF461  | NM_153257.2  | 39 | 14  | 52  | 3007  | 2969  | 3192  | 229-1920  | 1921-3192  | Yes |
| ZNF468  | NM_001008801 | 35 | 256 | 290 | 3236  | 3202  | 3935  | 152-1720  | 1721-3935  | Yes |
| ZNF486  | NM_052852.3  | 56 | 21  | 76  | 2073  | 2018  | 3897  | 118-1509  | 1510-3897  | No  |
| ZNF490  | NM_020714.2  | 33 | 267 | 299 | 2851  | 2819  | 6098  | 130-1719  | 1720-6098  | Yes |
| ZNF492  | NM_020855.2  | 48 | 20  | 67  | 2910  | 2863  | 4245  | 245-1840  | 1841-4245  | Yes |
| ZNF493  | NM_145326.2  | 47 | 21  | 67  | 1172  | 1126  | 1765  | 120-431   | 432-1765   | Yes |
| ZNF497  | NM_001207009 | 34 | 28  | 61  | 2430  | 2397  | 3481  | 187-1683  | 1684-3481  | Yes |
| ZNF500  | NM_021646.1  | 46 | 29  | 74  | 2276  | 2231  | 3252  | 248-1690  | 1691-3252  | Yes |

|         |              |    |     |     |      |      |       |          |            |     |
|---------|--------------|----|-----|-----|------|------|-------|----------|------------|-----|
| ZNF501  | NM_00125828C | 40 | 40  | 79  | 2925 | 2886 | 3400  | 721-1536 | 1537-3400  | Yes |
| ZNF506  | NM_001099269 | 49 | 28  | 76  | 1844 | 1796 | 3341  | 149-1483 | 1484-3341  | No  |
| ZNF527  | NM_032453.1  | 56 | 21  | 76  | 2234 | 2179 | 5126  | 112-1941 | 1942-5126  | Yes |
| ZNF528  | NM_032423.2  | 48 | 20  | 67  | 3703 | 3656 | 3995  | 427-2313 | 2314-3995  | Yes |
| ZNF529  | NM_001145649 | 58 | 10  | 67  | 3759 | 3702 | 5242  | 285-1976 | 1977-5242  | Yes |
| ZNF543  | NM_213598.3  | 43 | 256 | 298 | 2468 | 2426 | 3671  | 358-2160 | 2161-3671  | Yes |
| ZNF548  | NM_001172773 | 37 | 21  | 57  | 2575 | 2539 | 4565  | 251-1888 | 1889-4565  | Yes |
| ZNF550  | NM_00127709C | 33 | 267 | 299 | 2814 | 2782 | 4323  | 182-1450 | 1451-4323  | Yes |
| ZNF552  | NM_024762.3  | 58 | 19  | 76  | 2007 | 1950 | 2352  | 171-1394 | 1395-2352  | Yes |
| ZNF554  | NM_001102651 | 54 | 23  | 76  | 2933 | 2880 | 3698  | 199-1815 | 1816-3698  | Yes |
| ZNF555  | NM_001172775 | 48 | 10  | 57  | 4429 | 4382 | 8544  | 139-2022 | 2023-8544  | Yes |
| ZNF557  | NM_001044387 | 43 | 256 | 298 | 4444 | 4402 | 5990  | 474-1766 | 1767-5990  | Yes |
| ZNF566  | NM_001145343 | 39 | 29  | 67  | 4671 | 4633 | 5253  | 136-1395 | 1396-5253  | Yes |
| ZNF585B | NM_152279.3  | 41 | 28  | 68  | 3555 | 3515 | 6210  | 253-2562 | 2563-6210  | Yes |
| ZNF587  | NM_001204817 | 49 | 28  | 76  | 2216 | 2168 | 6943  | 227-1951 | 1952-6943  | Yes |
| ZNF595  | NM_001286052 | 34 | 257 | 290 | 2384 | 2351 | 2815  | 205-2055 | 2056-2815  | Yes |
| ZNF619  | NM_001145082 | 41 | 28  | 68  | 3246 | 3206 | 4171  | 308-2158 | 2159-4171  | Yes |
| ZNF626  | NM_001076675 | 37 | 21  | 57  | 3966 | 3930 | 6088  | 151-1737 | 1738-6088  | No  |
| ZNF639  | NM_016331.1  | 35 | 257 | 291 | 2635 | 2601 | 3013  | 446-1903 | 1904-3013  | Yes |
| ZNF652  | NM_001145365 | 67 | 1   | 67  | 4906 | 4840 | 11492 | 465-2285 | 2286-11492 | Yes |
| ZNF655  | NM_00100996C | 33 | 267 | 299 | 2570 | 2538 | 4585  | 221-1696 | 1697-4585  | Yes |
| ZNF660  | XM_005265090 | 56 | 21  | 76  | 4815 | 4760 | 5899  | 399-1394 | 1395-5899  | No  |
| ZNF662  | NM_001134656 | 34 | 257 | 290 | 2615 | 2582 | 5524  | 187-1545 | 1546-5524  | No  |
| ZNF670  | NM_00120422C | 33 | 43  | 75  | 2419 | 2387 | 4195  | 218-1384 | 1385-4195  | Yes |
| ZNF674  | NM_001039891 | 67 | 1   | 67  | 3066 | 3000 | 4095  | 228-1973 | 1974-4095  | Yes |
| ZNF677  | NM_182609.2  | 56 | 12  | 67  | 2809 | 2754 | 3509  | 152-1906 | 1907-3509  | Yes |
| ZNF681  | NM_138286.2  | 67 | 1   | 67  | 3347 | 3281 | 6513  | 143-2080 | 2081-6513  | Yes |
| ZNF69   | NM_021915.2  | 45 | 5   | 49  | 657  | 613  | 1671  | 70-519   | 520-1671   | Yes |
| ZNF7    | NM_001282796 | 37 | 21  | 57  | 1248 | 1212 | 1929  | 138-584  | 585-1929   | Yes |
| ZNF70   | NM_021916.2  | 56 | 21  | 76  | 3480 | 3425 | 4042  | 462-1802 | 1803-4042  | No  |
| ZNF701  | NM_001172655 | 67 | 10  | 76  | 4560 | 4494 | 5538  | 226-1821 | 1822-5538  | Yes |
| ZNF709  | NM_152601.3  | 56 | 21  | 76  | 2282 | 2227 | 4916  | 162-2087 | 2088-4916  | Yes |
| ZNF713  | NM_182633.1  | 61 | 4   | 64  | 1608 | 1548 | 2065  | 39-1331  | 1332-2065  | Yes |
| ZNF714  | NM_182515.3  | 34 | 1   | 34  | 5070 | 5037 | 8808  | 379-2046 | 2047-8808  | Yes |
| ZNF716  | NM_001159279 | 60 | 17  | 76  | 1963 | 1904 | 5210  | 113-1600 | 1601-5210  | No  |
| ZNF737  | NM_001159293 | 67 | 10  | 76  | 5761 | 5695 | 8419  | 181-1791 | 1792-8419  | No  |
| ZNF747  | NM_023931.2  | 59 | 18  | 76  | 1810 | 1752 | 2392  | 195-770  | 771-2392   | Yes |
| ZNF764  | NM_001172679 | 34 | 18  | 51  | 2216 | 2183 | 2814  | 140-1363 | 1364-2814  | Yes |
| ZNF765  | NM_001040185 | 64 | 4   | 67  | 4021 | 3958 | 4577  | 124-1695 | 1696-4577  | Yes |
| ZNF770  | NM_014106.3  | 44 | 21  | 64  | 3138 | 3095 | 5453  | 355-2430 | 2431-5453  | Yes |
| ZNF772  | NM_001024596 | 38 | 20  | 57  | 4769 | 4732 | 5434  | 262-1731 | 1732-5434  | Yes |

|               |              |    |     |     |      |      |       |          |            |     |
|---------------|--------------|----|-----|-----|------|------|-------|----------|------------|-----|
| ZNF776        | NM_173632.3  | 44 | 35  | 78  | 4115 | 4072 | 5292  | 264-1820 | 1821-5292  | Yes |
| ZNF780B       | NM_001005851 | 67 | 10  | 76  | 4343 | 4277 | 8664  | 66-2567  | 2568-8664  | Yes |
| ZNF783        | NM_00119522C | 38 | 20  | 57  | 2576 | 2539 | 4455  | 164-1804 | 1805-4455  | Yes |
| ZNF785        | NM_152458.6  | 46 | 4   | 49  | 2621 | 2576 | 3265  | 161-1378 | 1379-3265  | No  |
| ZNF793        | NM_001013659 | 53 | 5   | 57  | 2224 | 2172 | 7136  | 443-1663 | 1664-7136  | Yes |
| ZNF805        | NM_001023563 | 43 | 256 | 298 | 5460 | 5418 | 10126 | 208-2091 | 2092-10126 | Yes |
| ZNF814        | NM_001144989 | 33 | 266 | 298 | 5451 | 5419 | 6283  | 273-2840 | 2841-6283  | Yes |
| ZNF816-ZNF321 | NM_001202473 | 50 | 1   | 50  | 2235 | 2186 | 2680  | 211-912  | 913-2680   | No  |
| ZNF829        | NM_001037232 | 34 | 257 | 290 | 2342 | 2309 | 5056  | 366-1664 | 1665-5056  | No  |
| ZNF835        | NM_00100585C | 32 | 20  | 51  | 2392 | 2361 | 2774  | 228-1841 | 1842-2774  | No  |
| ZNF839        | NM_001267827 | 54 | 21  | 74  | 3443 | 3390 | 3781  | 351-2786 | 2787-3781  | Yes |
| ZNF85         | NM_001256172 | 30 | 22  | 51  | 495  | 466  | 1580  | 149-412  | 413-1580   | Yes |
| ZNF850        | NM_001193552 | 53 | 5   | 57  | 6222 | 6170 | 7721  | 160-3432 | 3433-7721  | No  |
| ZNF99         | NM_001080409 | 64 | 4   | 67  | 5138 | 5075 | 7881  | 156-2750 | 2751-7881  | No  |
| ZNHIT3        | NM_001281432 | 33 | 267 | 299 | 554  | 522  | 2064  | 74-520   | 521-2064   | Yes |
| ZNRF3         | NM_001206998 | 57 | 10  | 66  | 5445 | 5389 | 6696  | Jan-11   | 2812-6696  | Yes |
| ZSCAN2        | NM_181877.3  | 42 | 257 | 298 | 3178 | 3137 | 3765  | 227-2071 | 2072-3765  | No  |
| ZSCAN22       | NM_181846.2  | 35 | 256 | 290 | 2833 | 2799 | 4643  | 148-1623 | 1624-4643  | Yes |
| ZSCAN29       | NM_152455.3  | 31 | 22  | 52  | 3560 | 3530 | 5607  | 148-2706 | 2707-5607  | Yes |
| ZSWIM1        | NM_080603.4  | 47 | 11  | 57  | 2037 | 1991 | 2787  | 114-1571 | 1572-2787  | Yes |
| ZSWIM7        | NM_001042697 | 35 | 256 | 290 | 907  | 873  | 2008  | 99-521   | 522-2008   | Yes |
| ZYG11A        | NM_001004339 | 57 | 1   | 57  | 3671 | 3615 | 4286  | 374-2653 | 2654-4286  | Yes |
| ZYG11B        | NM_024646.2  | 33 | 267 | 299 | 6517 | 6485 | 8143  | 196-2430 | 2431-8143  | Yes |
